# Supplementary material for: The transcriptomic response to a short day to long day shift in leaves of the reference legume Medicago truncatula
Source: PeerJ. 2019 Mar 22;7:e6626. doi: 10.7717/peerj.6626 (PMC6432905; doi:10.7717/peerj.6626)
Supplement: Table S5 — Contrasts LD expression against SD expression for genes with differential patterns of expression at individual timepoints. [file peerj-07-6626-s012.csv]

timepoint	gene	baseMean	effectSize	log2FoldChange	lfcSE	stat	padj	description
ZT0	Medtr1g091023	41.33308875248744	8.09	10.222306817262055	1.7081083274140498	5.984577589840496	1.1360143112246127e-8	cytochrome P450 family protein
ZT0	Medtr3g082630	28.77593858110529	3.09	7.900544200845804	1.2080559378978	6.539882759563225	3.825896696854141e-10	B-box type zinc finger protein
ZT0	Medtr5g082130	48.497689509609494	10.75	7.439596780960574	0.8201561587507743	9.070951551826715	1.6310668781675006e-18	hypothetical protein
ZT0	Medtr1g091010	4.852765153817732	0.95	7.1167903477402525	1.6167211509780683	4.40199000516249	3.3978360305067105e-5	cytochrome P450 family protein
ZT0	Medtr2g041550	1260.8165067292375	130.04	6.885319014579541	0.53784620032426	12.801650379659609	7.343032634992803e-36	auxin-binding protein ABP19a
ZT0	Medtr0036s0220	14.642485434133043	0.51	6.469605252849706	1.2543480965432805	5.157743110288585	1.0039971049580463e-6	UDP-glucosyltransferase family protein
ZT0	Medtr2g041390	4.815652992869562	1.96	6.037820796716483	1.7221446402301896	3.5059893667871247	0.0011046351461015008	frigida interacting protein
ZT0	Medtr4g069080	643.9322452691325	35.54	5.61411762960804	0.22644335721126774	24.79259139569356	1.2305337377338865e-132	cytochrome C biogenesis protein Ccs1
ZT0	Medtr1g038430	170.92619953147408	6.79	5.305544716922308	0.40011665005009056	13.259994844648697	2.083966643257891e-38	DnaJ heat shock amino-terminal domain protein
ZT0	Medtr2g101850	27.426260747633997	31.31	5.152643164695885	0.5818796065140122	8.855170566236032	1.081793671234154e-17	cytoplasmic dynein light chain
ZT0	Medtr5g094440	10.233868330652466	0.35	4.9099051149289	1.4041620159228003	3.496679912468764	0.001139420780108067	nucleic acid-binding protein
ZT0	Medtr7g090590	1421.7998638583313	453.49	4.850364484539949	0.36843761936266994	13.164683055248803	7.117921176995303e-38	GASA/GAST/Snakin
ZT0	Medtr2g022700	123.94275510510991	0.22	4.831870163471979	1.2624947002195104	3.8272399580226835	3.4694028330723077e-4	glucose-6-phosphate/phosphate translocator-like protein
ZT0	Medtr1g082580	90.57633563787391	5.31	4.789561486340007	0.5618754960764252	8.524239835667332	1.7915776729069745e-16	Serine/Threonine kinase family protein
ZT0	Medtr1g067560	3.1921665800233776	0.59	4.745759028339942	1.3690657038662861	3.4664216735089948	0.0012652067352245371	copper chaperone
ZT0	Medtr1g068630	4.075029388095469	0.72	4.647094067385041	1.3090268088897206	3.550037352807598	9.489142727082816e-4	nodulin MtN21/EamA-like transporter family protein
ZT0	Medtr3g020880	3.6939379862682515	1.74	4.586796431833498	1.402767650652	3.2698190820850312	0.0024382776288972554	subtilisin inhibitor 1
ZT0	Medtr3g462220	112.38582711796678	5.72	4.577554594367668	0.6698157067714198	6.834050841285806	5.6123605029821705e-11	maternal effect embryo arrest protein, putative
ZT0	Medtr4g007620	2.534755225303986	0.51	4.5126171333261444	1.532830685356219	2.943976250238913	0.00664243989882155	Novel GRP family
ZT0	Medtr2g076490	3.3276798853638545	0.25	4.374553051646804	1.4601612464663567	2.995938333682928	0.005700083196860961	epidermis-specific secreted EP1-like glycoprotein
ZT0	Medtr4g108880	81.88576902076164	3.06	4.361997656943788	0.3648033525480659	11.957120532133976	2.082316266451142e-31	two-component response regulator-like APRR7 protein
ZT0	Medtr3g099150	195.61262864528211	0.71	4.323091537857575	0.76759866742841	5.631968528997958	8.351775997131032e-8	nodulin-like/MFS transporter
ZT0	Medtr3g019160	12.24251465305261	1.82	4.317567348152276	0.9310306646219775	4.637406169543643	1.1986174383384016e-5	NADPH:quinone oxidoreductase-like protein
ZT0	Medtr5g069480	244.47788433360603	30.76	4.247725395008278	0.20982563602843016	20.244072532837386	1.4478321557760593e-88	zinc finger constans-like protein
ZT0	Medtr1g066750	38.064550880288174	3.73	4.213063772625944	0.5593203201488413	7.532470430369491	4.2177512734160373e-13	hypothetical protein
ZT0	Medtr8g090285	3.1939692740017516	0.09	4.167579175678923	1.4199639774062196	2.9349893673300365	0.006824169191903643	MFS transporter
ZT0	Medtr2g073370	28.789077390670172	0.18	4.162208743154827	1.300729756931954	3.1999027630245624	0.0030456360270476913	B-box type zinc finger protein
ZT0	Medtr4g025970	17.54474744680476	0.15	4.149014657969127	1.3399489256449504	3.0963976152838097	0.004207189475842272	cytochrome P450 family 71 protein
ZT0	Medtr2g034140	459.08118577660196	45.1	3.983008071364195	0.18710026292529597	21.288094463846377	7.203891863179595e-98	iron-sulfur-binding 4Fe-4S ferredoxin
ZT0	Medtr2g025710	5.875040910301912	0.49	3.971316795808396	1.1826547568801642	3.357967972229448	0.0018226732733869623	MBOAT (membrane bound O-acyl transferase) family protein, putative
ZT0	Medtr3g463730	419.96491100409116	51.82	3.9649745018978053	0.3030242961194078	13.084675231240842	1.9967663008459094e-37	ammonium transporter 1 protein
ZT0	Medtr1g031740	333.06794302707567	59.31	3.8902285458611074	0.2471563311412821	15.739951017630757	7.980154328994912e-54	transmembrane protein, putative
ZT0	Medtr3g098980	52.06700627409717	3.41	3.859649580835019	0.45323040268216236	8.515866451134086	1.9212013822242982e-16	omega-hydroxypalmitate O-feruloyl transferase
ZT0	Medtr5g005960	6.502252070118236	0.22	3.8040635678379044	1.3028766727622418	2.9197418661068446	0.007138455523566234	membrane-associated kinase regulator-like protein, putative
ZT0	Medtr4g064730	14.105272478578938	0.88	3.800571545080385	0.7943315324202861	4.784616233854201	6.097346582758077e-6	myb-like DNA-binding domain, shaqkyf class protein
ZT0	Medtr7g083060	138.75518046125362	14.62	3.7618429848412123	0.31569463228222444	11.916081555286638	3.3811191224643858e-31	heavy metal transport/detoxification superfamily protein
ZT0	Medtr4g012330	5.516248833453043	4.81	3.7330237461866655	0.8082466577407986	4.618668955119677	1.305102645333506e-5	hypothetical protein
ZT0	Medtr1g105480	23721.085361073212	1360.24	3.7160479619949203	0.10479451538884414	35.460328703333175	1.4349822910075375e-271	thiazole biosynthetic enzyme
ZT0	Medtr4g122090	18.11884149751481	2.49	3.7063065883841375	0.7892272925800252	4.696120652731139	9.180682280163253e-6	hypothetical protein
ZT0	Medtr3g103970	128.80188897146206	7.8	3.6954176451234857	0.24404944722636884	15.14208570075469	7.26103041273557e-50	early flowering protein
ZT0	Medtr4g060990	114.86039200539635	4.04	3.689993251665457	0.44349423459962056	8.320273328911984	9.562566022151426e-16	tyrosine phosphatase-like protein PTPLB protein
ZT0	Medtr1g079870	1858.2582153101487	45.38	3.6866996512728525	0.15095751129202065	24.42210142257244	1.053300673248539e-128	hypothetical protein
ZT0	Medtr5g024700	2.8236760174108104	0.12	3.6656084810660152	1.3797573526759852	2.656705161930619	0.014995856761741732	seven transmembrane MLO family protein
ZT0	Medtr1g098580	65.5846638251574	8.02	3.6550735811649955	0.39353439016716407	9.287812380545464	2.3490484805651017e-19	cupredoxin superfamily protein, putative
ZT0	Medtr4g082950	577.1718114239053	17.24	3.6344293692430023	0.19604954253693882	18.53832109074276	2.2959861495121517e-74	glycogen/starch/alpha-glucan phosphorylase family protein
ZT0	Medtr5g013440	18.46037893816088	4.03	3.6291458501929075	0.5271263815224332	6.8847737040049095	3.994061101657436e-11	expansin-B1-like protein
ZT0	Medtr1g041390	150.86188161997765	9.72	3.6094697583859454	0.2945381058706392	12.254678380973973	6.068448439315253e-33	chlorophyllase enzyme
ZT0	Medtr2g034790	9.64782249691211	0.75	3.588964543511486	0.9435768906997307	3.8035740159448035	3.7917782568101284e-4	myb transcription factor
ZT0	Medtr5g077900	23.42060427419592	1.47	3.566649444627481	0.8071730574575109	4.418692387803377	3.161735994376074e-5	Ulp1 protease family, carboxy-terminal domain protein
ZT0	Medtr3g009020	52.99436142660323	5.73	3.5628576763511264	0.2974682944645467	11.9772686456027	1.6455499235676755e-31	glycoside hydrolase family 5 protein
ZT0	Medtr3g070490	42.895253710249605	14.45	3.5535704237736025	0.35475729423376917	10.016905872080416	2.420676120266735e-22	early flowering protein
ZT0	Medtr1g090673	5.549822492899686	0.07	3.5471419153931647	1.2118134677712191	2.927135247900081	0.006983890881435089	LRR and NB-ARC domain disease resistance protein
ZT0	Medtr1g112240	223.6015164900321	3.2	3.5301155220452385	0.3181057427069533	11.097302085794993	3.459145790974581e-27	PPR containing plant-like protein
ZT0	Medtr2g074870	9.859445168096485	0.37	3.5161686517027793	0.8316136540661935	4.228127610111251	7.094672859711777e-5	cysteine-rich RLK (receptor-like kinase) protein
ZT0	Medtr3g117320	12.164627975702611	3.05	3.454589990369951	0.6380942468754516	5.413918096403471	2.700230860380772e-7	salt tolerance-like protein
ZT0	Medtr2g012800	20.31567109016055	3.46	3.453191691961275	0.8177303304934003	4.222897895786373	7.245330926979714e-5	hypothetical protein
ZT0	Medtr8g027985	1142.745609657539	8.12	3.4426583620838755	0.1632770916894829	21.08476043063686	5.054286767685065e-96	ubiquitin ligase cop1, putative
ZT0	Medtr4g070080	1386.5144645238802	169.78	3.412520104313062	0.1656524842663995	20.60047646991581	1.0483913268048504e-91	RNA-binding (RRM/RBD/RNP motif) family protein
ZT0	Medtr8g008840	282.48974684537455	118.32	3.4123287600606327	0.22091782994200393	15.446144663635563	7.3520739331624e-52	ethphon-induced protein
ZT0	Medtr7g097190	17.064547657827752	0.9	3.3650461073107354	0.5561024991569153	6.0511256691209745	7.709845867267558e-9	phytochelatin synthase
ZT0	Medtr4g084270	1081.2749625219742	4.32	3.3530951008203247	0.2652345891558029	12.641997831024463	5.38223642124528e-35	phosphoglucomutase/phosphomannomutase family protein
ZT0	Medtr4g039540	152.87258022126753	15.83	3.3420321176445094	0.4164465160489851	8.025117245191213	1.0117385627709393e-14	hypothetical protein
ZT0	Medtr5g095910	61.126615223882816	1.35	3.3295721700358776	0.368164924616273	9.043697395959674	2.075796526901332e-18	LRR and NB-ARC domain disease resistance protein
ZT0	Medtr8g105590	85.64662111828142	0.47	3.3232386808074	0.6012977131200409	5.52677751519065	1.4808242800928087e-7	flavin-binding kelch repeat F-box protein, putative
ZT0	Medtr7g088330	206.13157717588092	9.47	3.3140215579205625	0.1971646090820414	16.80839970900446	2.7611074827825852e-61	cytochrome P450 family protein
ZT0	Medtr1113s0020	8.402092572348538	0.61	3.3056409245883014	1.6122130673555455	2.0503747249800077	0.0651176613086617	hypothetical protein
ZT0	Medtr5g012600	3.6226836121391774	0.07	3.269145471604049	1.5301333116654525	2.136510228671378	0.05383321520608797	pectinesterase
ZT0	Medtr2g089530	62.3482177108276	4.49	3.2501818552628414	0.3775073931925938	8.609584643564023	8.773277298927656e-17	hypothetical protein
ZT0	Medtr3g005210	10.092434730211869	0.95	3.2482548729371548	0.7208671286397855	4.5060382751344665	2.1544469274240044e-5	cinnamyl-alcohol dehydrogenase-like protein
ZT0	Medtr2g084855	2.7752381611167785	0.56	3.247875595324755	1.4631186764097968	2.219830590430571	0.04466268114853473	phytosulfokine precursor protein
ZT0	Medtr7g103050	23.69331828826891	2.8	3.2433369627568194	0.8163171414688526	3.9731334771690228	1.9808305600469456e-4	hypothetical protein
ZT0	Medtr4g051000	61.908297758937735	4.49	3.240788891257469	0.3777679713648757	8.57878151911211	1.135800539493657e-16	hypothetical protein
ZT0	Medtr6g018770	6.070772996261337	0.19	3.239370606101001	1.0338046919417618	3.133445448014553	0.0037546842015885383	DUF4378 domain protein
ZT0	Medtr3g462340	3599.266041531742	19.68	3.228808006211404	0.1666345506512743	19.37658182887003	3.6180032954136092e-81	glycogen/starch/alpha-glucan phosphorylase family protein
ZT0	Medtr5g070700	19.973457742155173	0.19	3.2218897044580017	1.1104329015326448	2.9014717593571624	0.007529565520330019	cytochrome P450 family 71 protein
ZT0	Medtr4g070190	99.72535693620145	8.08	3.219735336505176	0.33276608268251	9.675671602556637	6.512611248851495e-21	RNA-binding (RRM/RBD/RNP motif) family protein
ZT0	Medtr2g088080	258.3141766829016	5.73	3.2181458046965044	0.27607212791331165	11.656902234285027	6.764613763322295e-30	L-ascorbate oxidase-like protein
ZT0	Medtr3g086750	79.27025998205553	4.89	3.211436149137316	0.24503174612495487	13.106204399733706	1.5116347070636203e-37	glycoside hydrolase family 5 protein
ZT0	Medtr2g024300	404.01177005911865	19.06	3.2093429132310276	0.26772125161228183	11.987628527446335	1.4575995351260943e-31	chaperonin-like RbcX protein
ZT0	Medtr5g018580	522.6540491239342	26.15	3.1984967434094638	0.17646691662369093	18.12519198842318	4.053777422039456e-71	thioredoxin-like protein
ZT0	Medtr3g025260	494.1236834670126	1.87	3.1726572872362784	0.39245563257671656	8.08411709218135	6.341134696991498e-15	flavonoid hydroxylase
ZT0	Medtr2g010580	273.50316394653515	38.48	3.1674781488622403	0.29150399105472985	10.865985530426396	4.12703058652591e-26	CAP, cysteine-rich secretory protein, antigen 5
ZT0	Medtr2g009480	3967.511019754017	1146.51	3.167045288302082	0.3269191257377034	9.687549730091636	5.83993956850299e-21	leguminosin group485 secreted peptide
ZT0	Medtr2g091080	5.927755148801425	0.11	3.161596914513702	1.153928488450284	2.7398551523411117	0.011929695945524064	frigida-LIKE protein
ZT0	Medtr7g102490	2.4701224364241474	0.05	3.1296401738406407	1.4886678663541253	2.102309215221658	0.058117122041913175	UDP-glucosyltransferase family protein
ZT0	Medtr5g076960	1301.3754242737427	182.38	3.1158239430187766	0.09994616162190764	31.175023557240895	6.633581143919218e-210	myb transcription factor
ZT0	Medtr5g091960	811.2180457990003	35.04	3.1084946714449346	0.2588296750058589	12.009807883792963	1.1205349705112468e-31	peroxisomal small heat shock protein
ZT0	Medtr4g082883	736.7430137531485	23.19	3.100086672938067	0.4391395416476421	7.059456912731222	1.2157781949118945e-11	hypothetical protein
ZT0	Medtr4g066000	3.6630861837293494	0.09	3.085335823394072	1.3520107969714725	2.282034899651155	0.038582058194028275	transducin/WD40 domain protein
ZT0	Medtr4g099050	31.828032157086124	6.41	3.071675858737067	0.4368698071108086	7.031101277177438	1.4768396703612588e-11	ethphon-induced protein
ZT0	Medtr1g087030	7071.0012912987195	1093.02	3.03416165448996	0.08787400115890825	34.528547858007386	1.7083871320424133e-257	calvin cycle protein CP12-1
ZT0	Medtr8g102940	2.257285974905219	0.22	3.022162034772245	1.5862997790336726	1.9051645059253917	0.08817735607492284	hypothetical protein
ZT0	Medtr4g076140	32.463293890805524	1.88	3.0174033357761822	0.3562276895197939	8.470434569091854	2.8008519654163143e-16	GRAS family transcription factor
ZT0	Medtr7g006060	281.0127358331424	4.39	3.012485516178636	0.22064706612812368	13.652959765299434	1.1270507852767209e-40	S-adenosylmethionine-dependent methyltransferase, putative
ZT0	Medtr6g032995	67.10534515820918	2.36	3.0028528423842875	0.42042553112867564	7.1424131506067665	6.86607932891858e-12	transmembrane amino acid transporter family protein
ZT0	Medtr5g026350	510.3218324503993	5.93	3.0019282153137294	0.17936738755941267	16.736198570765197	9.100336072660781e-61	nodulin-like/MFS transporter
ZT0	Medtr1g114300	473.026566145883	13.41	2.996595327156274	0.1609347175064973	18.61994337570633	5.312521546738614e-75	PPR containing plant-like protein
ZT0	Medtr4g012510	3.5730925078981497	2.01	2.9823526936336178	0.9815832085843773	3.0383085891767814	0.005013182855570363	hypothetical protein
ZT0	Medtr4g076090	200.67414985449474	92.66	2.979950769762713	0.24469757089784008	12.178097064178974	1.5215353525820878e-32	transmembrane protein, putative
ZT0	Medtr1g087540	89.2161392599647	5.67	2.968660654780708	0.34679440162897157	8.560290018628441	1.3275698143098627e-16	myb transcription factor, putative
ZT0	Medtr1g090670	172.36023823696004	23.87	2.965595791928435	0.20875551778686485	14.206071405289741	5.488004544510302e-44	myb-like transcription factor family protein
ZT0	Medtr5g095050	8.058559645732807	0.18	2.9610706105751854	1.0230263009778442	2.8944227609250035	0.007686517650016143	hypothetical protein
ZT0	Medtr8g033410	26.69561422659294	0.68	2.954969100984117	0.6779970302870064	4.3583805960525135	4.1019827884088e-5	D-glycerate dehydrogenase/hydroxypyruvate reductase
ZT0	Medtr8g011650	601.9995463309403	18.79	2.912150710365026	0.21308676322127126	13.666502162506555	9.473686052718943e-41	auxin-induced in root cultures protein, putative
ZT0	Medtr5g015680	62.83114714260704	1.88	2.8896815622569547	0.4042849392215493	7.147635941672814	6.6238169029476155e-12	BTB/POZ and TAZ domain protein
ZT0	Medtr8g097220	57.23417744076521	2.44	2.8804015122785054	0.3404884216045751	8.459616625741385	3.053519901615732e-16	amidase C869.01-like protein, putative
ZT0	Medtr6g011550	17.87741100812905	0.33	2.8568245338883447	0.921635591475114	3.09973330057261	0.004163544840130668	aldose 1-epimerase family protein
ZT0	Medtr1g031900	189.4865675580402	4.27	2.8464657507643327	0.22463092606331822	12.671744717652905	3.7132931728443576e-35	glucan endo-1,3-beta-glucosidase-like protein
ZT0	Medtr4g079850	2380.354314097351	71.72	2.841085106099504	0.11847173999930317	23.981120781345954	4.165472667700167e-124	ATP synthase I, related protein
ZT0	Medtr3g089020	490.437897161195	5.24	2.823336613190644	0.16981227482622185	16.626222197894222	5.491143363144102e-60	RNA-metabolising metallo-beta-lactamase
ZT0	Medtr3g064270	5.5108245926753145	0.25	2.8202081577603924	0.819855775290301	3.4398832608842587	0.0013854187038425956	zinc finger CCCH domain protein
ZT0	Medtr7g015340	3230.8842379528905	532.38	2.8019774143629297	0.08813208872367531	31.792930985081966	3.3059694590247657e-218	RALF
ZT0	Medtr7g108940	2115.4716758103573	32.74	2.77772431257596	0.09972343119893858	27.85427937226377	1.8193878273293752e-167	RelA-SpoT-like protein RSH1
ZT0	Medtr2g091140	76.04035946537513	4.57	2.753302037682434	0.2552270636377521	10.78765707068683	9.484645424268605e-26	DUF455 family protein
ZT0	Medtr1g090170	7.610889408021104	0.26	2.7512252805333994	1.0443128965149975	2.634483677942293	0.015915364588826263	AP2 domain class transcription factor
ZT0	Medtr5g076990	96.95818948028065	11.89	2.735330046597242	0.20271023842656857	13.49379324808061	9.522594011964824e-40	anaphase-promoting complex subunit 11 RING-H2 finger protein
ZT0	Medtr7g098700	131.8708054670562	3.4	2.7211798192944396	0.23703560777365754	11.480046583941354	5.004661831901499e-29	tyrosine/DOPA decarboxylase
ZT0	Medtr8g044230	497.76685656634595	7.98	2.7208533725366637	0.22717534085722374	11.976886937947542	1.651106261682783e-31	LRR receptor-like kinase
ZT0	Medtr4g068560	33.25599491348379	52.58	2.7056051466272693	0.4656750427053307	5.81007118377894	3.081618916765309e-8	hypothetical protein
ZT0	Medtr3g099720	11.777732387470769	0.29	2.704645064648246	0.7632011623553397	3.543816752455347	9.697449558979496e-4	MATE efflux family protein
ZT0	Medtr2g007860	4.141206978920288	0.25	2.7034422226489205	1.4822177290065923	1.8239170735468222	0.10372385737534301	hypothetical protein
ZT0	Medtr5g031860	5.130260488882795	0.17	2.681846542802607	1.0347065324110651	2.5918909940129486	0.017824994304821283	UDP-glucosyltransferase family protein
ZT0	Medtr4g068770	797.5414862755663	63.4	2.6458598800857978	0.1089074086912657	24.294581166524384	2.2804564119462152e-127	structural constituent of ribosome protein
ZT0	Medtr8g080520	14.696879230703834	0.91	2.627391532997491	0.5830512431061556	4.506278931848747	2.1524980231397553e-5	cytochrome P450 family 78 protein
ZT0	Medtr4g116500	18.608880693112752	4.07	2.6054396027918467	0.49952597866642917	5.21582402930778	7.489014788192756e-7	hypothetical protein
ZT0	Medtr1g110860	10.103380519894607	7.42	2.603947372875024	0.677975514075976	3.840769052587374	3.2960527798221034e-4	hypothetical protein
ZT0	Medtr4g082900	125.04299240114725	3.8	2.5953227353749195	0.6485634812341835	4.001647965803057	1.770084035666682e-4	hypothetical protein
ZT0	Medtr7g093490	715.6711869901864	136.53	2.5946073614428573	0.1433449867398959	18.100440206889523	6.2240775914797935e-71	thioredoxin
ZT0	Medtr3g112160	1293.8531617216845	117.62	2.5918638450732954	0.1383199042048116	18.738184211257824	5.94923419252308e-76	wound-responsive family protein
ZT0	Medtr1g090867	489.8153423695459	29.67	2.5847561225079994	0.15215967729276555	16.987129366308743	1.4312277375290732e-62	tyrosine phosphatase
ZT0	Medtr5g059130	52.640777789905854	1.06	2.5785745279066634	0.5257498147862136	4.904565737137145	3.464771045735453e-6	flavonol synthase/flavanone 3-hydroxylase
ZT0	Medtr4g012460	8.730591980736591	7.28	2.5782422331557773	0.569706542237862	4.52556192005132	1.981785949757755e-5	hypothetical protein
ZT0	Medtr4g084790	11.168775125866896	1.38	2.5773518572427476	0.7356312678935397	3.503592043637467	0.0011134617222004581	PPR domain protein
ZT0	Medtr7g088740	3961.844466318421	35.72	2.5717769115578886	0.11853114162646139	21.697056792573356	1.1781281747647128e-101	4-alpha-glucanotransferase DPE2
ZT0	Medtr6g088810	262.0470706200725	9.74	2.568218792714115	0.25774399769726086	9.964223476236585	4.0545059925924066e-22	pectinesterase
ZT0	Medtr2g069470	187.2022496826505	9.97	2.557273200969541	0.20236860103770427	12.636709389976378	5.739202533342509e-35	ribosome silencing factor
ZT0	Medtr1g089920	4.328641633386868	0.09	2.553731246033118	1.5063199512238112	1.695344500986219	0.13243354011232264	E3 ubiquitin ligase-like protein
ZT0	Medtr5g430430	58.577534048988404	13.54	2.548102919010667	0.29782065544949593	8.555830068820635	1.3765097473126174e-16	hypothetical protein
ZT0	Medtr6g047590	308.8137691181863	10.61	2.5394607742095463	0.2321724322930657	10.937822157128654	1.9303858290948802e-26	MATE efflux family protein
ZT0	Medtr3g033420	540.858739100026	22.95	2.5279379975169807	0.14934307268655958	16.927052269927533	3.901519120708744e-62	RNA polymerase sigma factor
ZT0	Medtr5g030290	58.97005273796331	13.55	2.5223302141066135	0.2965669201306297	8.505096296632125	2.1013751439730157e-16	hypothetical protein
ZT0	Medtr5g013620	59.577498278544724	0.37	2.522079730456746	0.6062804527732251	4.159922555510976	9.370474331528761e-5	beta-amylase
ZT0	Medtr8g009020	94.54408222532334	8.49	2.5220790717937187	0.24511220996945696	10.289487708947632	1.6083758623497984e-23	helix loop helix DNA-binding domain protein
ZT0	Medtr1g061080	210.316125979485	16.24	2.5149624780747355	0.20576249102080507	12.222647896600563	8.932406731673043e-33	FKBP-type peptidyl-prolyl cis-trans isomerase
ZT0	Medtr8g096120	20.486984337293876	2.93	2.504371669142744	0.5563816557574253	4.501175844364314	2.200813305740863e-5	hypothetical protein
ZT0	Medtr8g463380	421.6230649614455	20.37	2.4937863082965053	0.14886934488734468	16.75150992424701	7.067497925837946e-61	TCP family transcription factor
ZT0	Medtr3g116720	99.50945790274496	24.55	2.4857675997967736	0.3158732981900655	7.86950848343329	3.372313212186496e-14	MYB family transcription factor
ZT0	Medtr1g062540	19.815387152915267	1.22	2.4792095702145254	0.46712102903113834	5.307424449198285	4.700298029087913e-7	phenazine biosynthesis PhzC/PhzF family protein
ZT0	Medtr8g069760	3365.263246719626	14.17	2.4706077372524295	0.16612221699999774	14.872229505897234	3.8623143070901324e-48	alpha-glucan water dikinase
ZT0	Medtr7g104720	4.574813284700615	0.23	2.470065813676976	0.9756864590341896	2.531618421887334	0.02082809236330548	glutaredoxin (GRX) family protein
ZT0	Medtr3g111540	50.794334380132675	1.52	2.4633550268154822	0.43165573576796795	5.706758471384319	5.509983635139139e-8	transmembrane protein, putative
ZT0	Medtr8g030600	455.9280198700504	12.51	2.456692725796833	0.1334923701005676	18.403244499637417	2.6963609699838864e-73	anion transporter 4
ZT0	Medtr3g008920	155.43541239326737	0.29	2.4548126492431446	0.9111384851115311	2.694225619218197	0.01352945252152648	major intrinsic protein (MIP) family transporter
ZT0	Medtr7g016960	47.94392836049856	0.31	2.452787824650337	0.5448652334069558	4.5016412761618945	2.1964995653441884e-5	pentatricopeptide (PPR) repeat protein
ZT0	Medtr5g016010	193.27157309774984	17.75	2.450074494961525	0.18838479511115072	13.005691321934624	5.558431912172476e-37	peroxidase family protein
ZT0	Medtr8g093750	727.4318590591126	41.58	2.4341628554762	0.1050265937900093	23.176633342437796	6.778459279588889e-116	TPR repeat protein
ZT0	Medtr4g081570	3.3138034888610064	0.73	2.432188279826044	1.0834901774770254	2.2447718773875245	0.04210764108938762	hypothetical protein
ZT0	Medtr6g066190	43.77159254084432	3.47	2.424023692015912	0.3558230624037499	6.812441205020572	6.48062416086873e-11	Kunitz type trypsin inhibitor / Alpha-fucosidase
ZT0	Medtr7g012250	61.72499986896558	2.39	2.4185467781935173	0.2805318417024428	8.621291485188497	7.95775792004359e-17	calcium/lipid-binding (CaLB) phosphatase
ZT0	Medtr4g019370	18.867484522082254	1.4	2.4128596452487248	0.453297113151915	5.322909798545518	4.3382930043500083e-7	myb transcription factor
ZT0	Medtr4g092780	115.1145464105969	6.96	2.410068943234936	0.26743167077246877	9.011905494489566	2.749008218636038e-18	glucose-6-phosphate 1-epimerase-like protein
ZT0	Medtr3g062010	14.511087045985102	0.17	2.399373703802859	0.5796884314736108	4.139074671032288	1.0209165530821318e-4	LRR and NB-ARC domain disease resistance protein
ZT0	Medtr6g051780	702.1668428276092	97.25	2.3882727441308815	0.18204856561480973	13.118877020894223	1.2857153105910752e-37	transmembrane protein, putative
ZT0	Medtr5g013640	261.49114335595493	7.89	2.387137951154621	0.19836322707009302	12.034175821867978	8.405876236008455e-32	beta-amylase
ZT0	Medtr1g070440	562.8560471650012	79.23	2.3850091384240195	0.13529994900640274	17.62756864240322	2.6026218122024805e-67	linker histone H1 and h5 family protein
ZT0	Medtr8g077180	1241.0419366562962	62.53	2.3688550942213964	0.14193176414740705	16.69009829090237	1.9038052981214782e-60	soluble inorganic pyrophosphatase
ZT0	Medtr5g096820	90.18387426324354	0.35	2.361003777723578	0.48194695407523397	4.898887227649157	3.559947026266157e-6	galactinol-raffinose galactosyltransferase
ZT0	Medtr7g087760	20.33301916910873	0.1	2.360012206655422	1.3593213209806594	1.7361694915171573	0.1226664368980259	hypothetical protein
ZT0	Medtr3g099500	175.18156261888737	4.79	2.359720122271923	0.15870382677792375	14.868703358828952	4.0601936994962277e-48	isoamylase-type starch debranching enzyme
ZT0	Medtr4g067330	2.9109066306002447	0.24	2.347293470222291	1.5083834286842706	1.5561649813865848	0.16986410060096746	transmembrane protein, putative
ZT0	Medtr4g114320	325.52865073393326	16.75	2.3472516530737852	0.15304524196916694	15.336978940819808	3.861803025844406e-51	substrate carrier family protein
ZT0	Medtr0204s0020	26.558644593777775	0.84	2.3348133590212483	0.45171665621345164	5.16875640272598	9.494116317989083e-7	sugar porter (SP) family MFS transporter
ZT0	Medtr7g009930	74.75516301187486	3.46	2.3306420765600895	0.2846056698268817	8.189021947376379	2.763076227212257e-15	aldose 1-epimerase family protein
ZT0	Medtr4g127790	39.80012838839547	1.51	2.329315722388662	0.3498002309765369	6.6589885200644785	1.7808169304862287e-10	lysine-tRNA ligase
ZT0	Medtr7g056123	10.322751861636226	3.4	2.3277925013480245	0.9736786179687951	2.390719543789578	0.02965841416551911	hypothetical protein
ZT0	Medtr5g018720	7.138680794701667	1.76	2.3259387028622256	0.7535918113697923	3.086470245257048	0.0043365430519470205	DUF4228 domain protein
ZT0	Medtr4g130730	539.2872584841635	55.74	2.3143057586626714	0.20635155388439594	11.215354161855316	9.464776188298718e-28	YbaB/EbfC DNA-binding family protein
ZT0	Medtr4g085810	165.00497022639797	0.82	2.313073594104845	0.31036450056450476	7.45276470053026	7.522074595876087e-13	receptor-like kinase
ZT0	Medtr1g088970	245.6939827245634	13.81	2.3051209555772543	0.18518550361131841	12.447631756400433	5.925828165277677e-34	transmembrane protein, putative
ZT0	Medtr1g012700	5.307748953637237	1.2	2.2991553103339917	0.7288016641466208	3.1547064495608037	0.00351564628060884	Lipid transfer protein
ZT0	Medtr8g020670	215.06949677747176	19.34	2.295094246053007	0.17621704122864612	13.024246860864402	4.384363856124189e-37	germin family 3 protein
ZT0	Medtr4g101260	27.648711053915104	9.63	2.286601789536455	0.31985400017020743	7.148892270597399	6.572121347860828e-12	Lipid transfer protein
ZT0	Medtr5g012000	5.576138288816038	0.2	2.278864384913671	1.2297997282349429	1.853036988538278	0.09790938144640057	plant invertase/pectin methylesterase inhibitor
ZT0	Medtr6g007095	112.64974347524051	3.64	2.2753483355061035	0.22601670094677945	10.067169045361315	1.4715907318553493e-22	GDSL-like lipase/acylhydrolase
ZT0	Medtr6g014150	465.3854419351434	12.93	2.2735068078201555	0.15978148746257254	14.228849937028563	3.990888237033758e-44	UDP-glucosyltransferase family protein
ZT0	Medtr3g076530	146.30603488609228	2.84	2.270508728290839	0.26481662664634875	8.573890382355057	1.1826633539937325e-16	cytochrome P450 family 71 protein
ZT0	Medtr7g052120	205.48812236790283	83.85	2.261286561587048	0.177601198254846	12.732383473799828	1.7538462744900943e-35	stomagen protein, putative
ZT0	Medtr5g019780	75.17864141863085	2.38	2.261044665149646	0.2365959898584154	9.556563771443075	1.993797234362498e-20	cupin family protein
ZT0	Medtr4g080130	11.842287903962179	0.64	2.260116713094037	0.5221972893923489	4.32808970671603	4.666724921788851e-5	aspartate aminotransferase
ZT0	Medtr4g012490	9.639976477539328	6.26	2.2564401995375842	0.5063948251278477	4.45589111019827	2.6904173670077253e-5	hypothetical protein
ZT0	Medtr4g066010	446.67080471290245	3.63	2.253018257773658	0.1915932320126463	11.75938332531989	2.1001942385044688e-30	hypothetical protein
ZT0	Medtr8g013680	1893.18491439984	188.33	2.2436541140923865	0.16220108770062325	13.832546661052788	9.871624032138571e-42	major intrinsic protein (MIP) family transporter
ZT0	Medtr1g064230	2665.225620463572	79.02	2.242458125604349	0.14857085302613726	15.093526623353544	1.5043169832405782e-49	RNA-binding (RRM/RBD/RNP motif) family protein
ZT0	Medtr6g032880	600.5359559547652	14.71	2.2380486272518474	0.18974928859366336	11.794766893932833	1.3917120469498094e-30	NDH-dependent cyclic electron flow protein, putative
ZT0	Medtr2g037855	8.3246138402167	9.53	2.229308186225816	0.70226025083758	3.174475820846956	0.0033029643552582593	hypothetical protein
ZT0	Medtr4g096730	6.349391830702837	1.61	2.228429688896343	0.8257879441962218	2.698549554468706	0.013364818093645833	FBD protein
ZT0	Medtr0019s0100	176.30362674878012	3.67	2.218401233291235	0.2826390354143209	7.8488848153592015	3.9509086679270115e-14	functional resistance protein KR1, putative
ZT0	Medtr1g032100	38.15100530006271	0.98	2.218245413674507	0.3566991030062011	6.218814106846643	2.8245003073695717e-9	ankyrin repeat plant-like protein
ZT0	Medtr5g074620	109.56910305470092	4.59	2.2080701562610163	0.2873604962146214	7.683972520049768	1.3733472347769581e-13	tRNA pseudouridine synthase
ZT0	Medtr2g097030	228.8125520957928	9.81	2.2079793152734566	0.4721051044582262	4.676880835269231	1.0012193588514432e-5	expansin A10
ZT0	Medtr8g087320	77.08933046305305	5.49	2.2078327723264954	0.24909437062699719	8.863439052312359	1.0095025279209544e-17	hypothetical protein
ZT0	Medtr1g010210	28.169356503691805	1.42	2.2021508895345345	0.35532598485825345	6.197550934567918	3.2101656797832535e-9	sulfate transporter-like protein
ZT0	Medtr0170s0030	35.003950670416046	1.54	2.2011194233069564	0.3819671615140801	5.762588109883416	4.0319498494454204e-8	transmembrane protein, putative
ZT0	Medtr0374s0050	67.18924789970221	3.2	2.194212553200244	0.3524960623993831	6.2247859969402155	2.7254480908444744e-9	aldo/keto reductase family oxidoreductase
ZT0	Medtr3g058610	31.992747463385086	2.94	2.1935668719246784	0.28290935811741286	7.753603085177216	8.141577648974193e-14	naringenin 3-dioxygenase (flavanone-3-hydroxylase)
ZT0	Medtr8g097000	8.989536210259844	0.11	2.1932182657140618	0.8511472476515949	2.5767788966778458	0.01854341042362714	DEAD-box ATP-dependent RNA helicase family protein
ZT0	Medtr2g072160	65.23121551183682	0.61	2.1884542803023703	0.2855213149841054	7.664766745782881	1.5850185036115076e-13	callose synthase-like protein
ZT0	Medtr2g014650	83.02123332647773	2.39	2.186125239369741	0.320447325487268	6.822104806290855	6.078448780192311e-11	receptor-like kinase
ZT0	Medtr4g128260	52.22591862188868	2.15	2.1831875147036586	0.35393760600162166	6.1682835553045345	3.820897126939682e-9	P-loop nucleoside triphosphate hydrolase superfamily protein
ZT0	Medtr5g034980	41.282525175705025	1.28	2.1724882678535	0.42704590032274325	5.0872476851121275	1.4226899270126425e-6	nodulin MtN21/EamA-like transporter family protein
ZT0	Medtr5g079860	497.7334048537016	9.89	2.1676138342980016	0.1795030141672637	12.075640313639443	5.146397900909283e-32	23S rRNA m2A2503 methyltransferase
ZT0	Medtr4g081420	197.06831116895552	9.28	2.1493576053397017	0.18344046631787794	11.716921835638766	3.4138795487979644e-30	C2H2-like zinc finger protein
ZT0	Medtr4g095450	467.6057727624857	50.02	2.1460199795582215	0.28034934021292535	7.654806599253343	1.7074418877792254e-13	class III peroxidase
ZT0	Medtr7g007280	146.81847847220075	12.11	2.1421309605961225	0.23701434001822239	9.037980404187481	2.1841132356420373e-18	neoxanthin synthase
ZT0	Medtr1g031690	221.5647687697835	4.43	2.141985910426368	0.2267680522016865	9.445712875468434	5.570619304527065e-20	DNA gyrase subunit A
ZT0	Medtr3g078410	50.910894639614625	0.85	2.1402667345192685	0.4528117917737021	4.726614397861996	7.973260119355888e-6	alpha-N-acetylglucosaminidase family protein
ZT0	Medtr1g064235	166.1177151337385	20.54	2.1381733019112428	0.4810271809586014	4.445015555358523	2.8200016700037052e-5	hypothetical protein
ZT0	Medtr7g108855	11.730850212828274	1.21	2.1375664626776367	0.5315499775837372	4.02138378858439	1.6374628478967745e-4	anaphase-promoting complex subunit 11 RING-H2 finger protein
ZT0	Medtr7g065640	8.957238638775738	0.62	2.134918940246989	0.757859543350102	2.8170377466114966	0.009606276929213526	glutathione S-transferase, amino-terminal domain protein
ZT0	Medtr6g014160	13.460540068444722	0.39	2.13269241409797	0.6435840841078384	3.313774325315071	0.0021106204930958013	UDP-glucosyltransferase family protein
ZT0	Medtr1g100587	101.77995308152819	21.76	2.132265056216761	0.22359057183435407	9.536471232769324	2.3997068310158644e-20	heavy metal-associated domain protein, putative
ZT0	Medtr3g464530	19.419859013423995	0.47	2.1312740448308984	0.6511509462718809	3.273087533748294	0.002413896152275554	2OG-Fe(II) oxygenase family oxidoreductase
ZT0	Medtr6g008800	79.30327403999759	0.58	2.125379337439279	0.4825153487926816	4.404791148628255	3.356833994872703e-5	ABC transporter B family protein
ZT0	Medtr3g005060	1102.302097503471	50.32	2.125048919998289	0.10195135112950773	20.843754363773577	6.886014623174273e-94	dienelactone hydrolase family protein
ZT0	Medtr5g095920	5.35973431015195	1.14	2.124227655976668	0.8125256524642834	2.6143514971301705	0.01678464941680835	hypothetical protein
ZT0	Medtr3g048270	481.13671237227163	9.66	2.115107288228177	0.13029189615654116	16.233605854403635	3.228827870695635e-57	DUF1296 family protein
ZT0	Medtr4g075510	273.5311712933053	37.35	2.1071219517487014	0.15891337800748534	13.259563028415702	2.092133562114899e-38	transmembrane protein, putative
ZT0	Medtr3g014240	27.102642049605326	1.43	2.1016410811157864	0.5568426097869927	3.774210242135961	4.231984003437649e-4	thioredoxin
ZT0	Medtr7g100050	255.72576599617594	14.19	2.0947777116267514	0.19783817525971342	10.588339226627104	7.690118164825855e-25	nodulin MtN21/EamA-like transporter family protein
ZT0	Medtr3g033150	197.2633617915511	24.16	2.0862655970568666	0.15823726725804502	13.184413717501165	5.529674226444546e-38	RNA polymerase sigma factor
ZT0	Medtr5g020440	34.115172044723685	0.45	2.0768560377972802	0.7645982723207135	2.7162709006568817	0.012734223233639461	GTP-binding ERG-like protein
ZT0	Medtr3g033620	475.27532942039346	19.82	2.073981051970527	0.15910268693121146	13.035487281664947	3.7903417601941655e-37	DUF3411 domain protein
ZT0	Medtr6g071210	234.13063039895195	10.37	2.066811031996135	0.15312066921802378	13.49792319058681	9.039073747353793e-40	dihydroorotate dehydrogenase family protein
ZT0	Medtr7g101840	409.5472659313313	7.17	2.065543189045663	0.1209171796642381	17.082297112629053	2.8841458100020767e-63	RNA polymerase sigma factor
ZT0	Medtr1g098650	63.71740477256207	1.25	2.0604542172699913	0.3424400153732867	6.016978521111013	9.418966263140125e-9	plant inositol phosphorylceramide synthase
ZT0	Medtr5g081720	2.86920396554481	0.05	2.0523279144515074	1.4842709613412193	1.3827178243768776	0.2264386191982867	glycoside hydrolase family 17 protein
ZT0	Medtr1g111990	31.767611116693	8.49	2.0479452803577063	0.29615225271075896	6.915177114515686	3.249667792220093e-11	transmembrane protein, putative
ZT0	Medtr1g067600	217.0996635852213	4.08	2.045608055709369	0.2764459135035973	7.399668274288852	1.1066209674255899e-12	hypothetical protein
ZT0	Medtr5g093240	549.7406265649383	109.44	2.041931969468327	0.13445177243545875	15.18709595627325	3.7024434152381923e-50	hypothetical protein
ZT0	Medtr1g050545	489.6377171031211	14.33	2.041151486853235	0.12709170628216354	16.06046174501394	5.183100854004099e-56	serine carboxypeptidase-like protein
ZT0	Medtr4g019770	54.40594045982932	1.93	2.039699820323063	0.2836533611065459	7.190818442503528	4.8938184840449415e-12	RHO guanyl-nucleotide exchange factor
ZT0	Medtr2g025140	211.82045618672822	10.9	2.037992539069443	0.18447607148718997	11.047462809890556	5.955149229103158e-27	ubiquinol oxidase
ZT0	Medtr4g115360	14595.394477567766	1335.43	2.0372735205562114	0.2222784624061275	9.16541125263808	7.048943507400599e-19	Lipid transfer protein
ZT0	Medtr7g105850	636.0742383829006	20.23	2.0348447677408883	0.1415431697893409	14.37614242191519	4.9187756148730865e-45	eukaryotic aspartyl protease family protein
ZT0	Medtr5g031310	19.19489885042019	0.83	2.0330912884917836	0.4579122205158715	4.439914895045513	2.8834588334544638e-5	cinnamyl alcohol dehydrogenase-like protein
ZT0	Medtr4g013345	88.85428284736467	8.57	2.032358139004065	0.229412716448209	8.85896026370831	1.0475488192149104e-17	disease resistance response protein
ZT0	Medtr4g010140	3414.449525816302	228.88	2.026475697182295	0.11308140381646455	17.920503538064867	1.5424674345002413e-69	post-illumination chlorophyll fluorescence increase
ZT0	Medtr4g120050	12.440720401101027	0.8	2.0251457660547154	0.5259797990626159	3.8502348753010365	3.177209762810337e-4	hypothetical protein
ZT0	Medtr5g007640	297.3371188706691	2.09	2.0173442210266113	0.2650944967409744	7.6099060743526925	2.384463751889789e-13	4-coumarate:CoA ligase-like protein
ZT0	Medtr3g010130	22.44323175830964	4.97	2.004363668092156	0.6005782249145961	3.337389843558151	0.0019517240027539613	heavy metal transport/detoxification superfamily protein
ZT0	Medtr4g094918	259.48133057509386	25.91	2.0032203667324793	0.23977971124061148	8.354419797938242	7.222688629442133e-16	papain family cysteine protease
ZT0	Medtr3g465070	7.818583285327958	0.75	2.003083253821121	1.2066296543187363	1.6600646657835234	0.14123359524863852	transmembrane protein, putative
ZT0	Medtr2g078540	881.5421503335941	58.62	2.0026477734915447	0.11364088308693916	17.622599535410604	2.824621513134668e-67	transmembrane protein, putative
ZT0	Medtr7g077340	5.689566861033817	0.94	2.000218903428457	1.0015647901772886	1.9970938705566867	0.07289746067320547	Bowman birk trypsin inhibitor
ZT0	Medtr3g072920	40.59728691870102	1.85	1.999314820142535	0.2804041882053118	7.130117538325203	7.467533061701448e-12	nucleic acid-binding protein
ZT0	Medtr7g084480	281.9964679838625	16.13	1.9949518840027824	0.16048620001428396	12.43067555855409	7.264350441535835e-34	histidine biosynthesis hisIE protein
ZT0	Medtr8g080660	377.64680734134885	11.3	1.9896374117122373	0.1719087363847925	11.573800456881525	1.747280553130164e-29	polysaccharide biosynthesis protein
ZT0	Medtr5g017160	137.30644702929177	38.31	1.98136627020385	0.26935121301260123	7.356069601628838	1.5158714629379618e-12	RALF
ZT0	Medtr1g106095	158.48696694301168	68.23	1.9782660200609958	0.17003708405989953	11.63432101296271	8.737901536394615e-30	transmembrane protein, putative
ZT0	Medtr5g044990	285.39710920697945	2.58	1.977848988746243	0.3204981041639719	6.171172194311465	3.755369361320585e-9	pfkB family carbohydrate kinase
ZT0	Medtr4g132260	1351.4533972425522	74.72	1.974925060296164	0.15352876326110404	12.863550896566782	3.361629822096289e-36	lactoylglutathione lyase-like protein
ZT0	Medtr8g094690	172.45970768543913	12.79	1.9661223231978484	0.20194437678648428	9.73595974537399	3.700560093220905e-21	transcription factor TGA5-like protein
ZT0	Medtr3g085830	26.98790044419569	0.53	1.963268657609675	0.41634740498005307	4.7154578943604415	8.401290237071967e-6	ankyrin repeat protein
ZT0	Medtr4g007600	369.17370628952415	21.88	1.9574007736857886	0.15742053746483986	12.434214780412482	6.969599954955615e-34	hypothetical protein
ZT0	Medtr1g093985	127.6492102474864	162.02	1.955874988733129	0.20219850213843035	9.673043905113037	6.678088190267771e-21	hypothetical protein
ZT0	Medtr7g070210	260.8881304352611	7.13	1.9550471362830308	0.13571876375149086	14.405135165118645	3.25743630132096e-45	MATE efflux family protein
ZT0	Medtr8g088880	175.07761851060553	8.88	1.9487748418835178	0.2099998368269172	9.27988741005407	2.522598622226327e-19	glutelin type-B-like protein
ZT0	Medtr1g093960	127.92428730287611	162.03	1.9469071872749095	0.20210690839050965	9.633056102729096	9.724929158315107e-21	hypothetical protein
ZT0	Medtr3g065370	24.427367187135516	1.8	1.9458007824010484	0.40893893111396473	4.758169580725942	6.897146995820035e-6	salt stress response/antifungal domain protein
ZT0	Medtr4g058910	198.54089220603072	11.29	1.9427600441003103	0.22153555085234192	8.769518195276932	2.2545936344112843e-17	GATA type zinc finger transcription factor family protein
ZT0	Medtr4g126330	13.822154403627504	0.26	1.9426196672664637	0.8681440266944653	2.2376697961778977	0.042833193012076574	beta-galactosidase
ZT0	Medtr7g102790	48.26458699011806	4.31	1.9424816817939357	0.31629118741536194	6.141434725599918	4.488827519982433e-9	PLATZ transcription factor family protein
ZT0	Medtr7g103040	24.95477048023402	2.57	1.9377978038210883	0.6700897434488209	2.89184817819718	0.007744845074913327	hypothetical protein
ZT0	Medtr4g036110	205.73306821722255	10.6	1.9355810853586266	0.18723539374150963	10.337688012293334	9.865951982770191e-24	calmodulin-binding protein, putative
ZT0	Medtr4g104660	48.004783523707815	2.66	1.934834636438691	0.2938668400014717	6.584052274931739	2.880573400311871e-10	cytochrome P450 family 71 protein
ZT0	Medtr3g091340	445.4349253199243	30.23	1.9323294393272115	0.13887325017609586	13.914338700051694	3.2381776695659445e-42	CCT motif protein
ZT0	Medtr7g087110	223.24087937111625	6.08	1.914455959112301	0.26950883336248244	7.103499856486733	8.96817686440104e-12	O-acetylserine (thiol) lyase
ZT0	Medtr4g019790	730.0431371665967	23.58	1.9137995914299266	0.16573420647516224	11.547402507500697	2.3305610082247665e-29	glutathione S-transferase, amino-terminal domain protein
ZT0	Medtr3g063240	719.9983597117712	13.01	1.9119196440429982	0.1284870508969919	14.880251594970336	3.435310298956973e-48	DMT(drug/metabolite transporter) superfamily permease
ZT0	Medtr3g464000	50.78283528374981	1.11	1.9092316338082196	0.3469351749764225	5.5031365266954255	1.6823671956873631e-7	glycosyltransferase family 90 protein
ZT0	Medtr1g011470	74.12877832334165	1.3	1.9063759696856237	0.42464374381830666	4.489353716939038	2.3175802743550114e-5	carboxy-terminal domain cyclin
ZT0	Medtr2g011720	581.0315759889035	89.48	1.9029126999846981	0.15863381223773146	11.995631152915617	1.3266359085206066e-31	receptor-interacting protein, putative
ZT0	Medtr8g107010	4685.831848792063	428.27	1.900737832623838	0.06470123319526916	29.377149997858414	2.559029043826476e-186	FKBP-type peptidyl-prolyl cis-trans isomerase
ZT0	Medtr3g088885	65.16991778218099	0.75	1.8957673454737616	0.3616710175885599	5.241689970387406	6.568828708705047e-7	four ACT domain ACT domain protein which protein
ZT0	Medtr7g081270	264.27424224959185	14.44	1.895038896290181	0.20616901343491578	9.191676599298537	5.573638182692067e-19	transcription termination factor family protein
ZT0	Medtr1g073230	512.3123489722041	16.92	1.8883559348797716	0.12888395719196963	14.651598042315769	9.486015628414955e-47	O-linked N-acetylglucosamine transferase, ogt protein, putative
ZT0	Medtr6g007530	11.320355629964029	1.3	1.8870260194713653	0.615066519922004	3.068003148197137	0.0045862029522253	DNA helicase, putative
ZT0	Medtr3g065930	410.9506973133161	20.62	1.8829480025559484	0.12007242285220142	15.68176903429101	1.9638825562788987e-53	5'-AMP-activated kinase-like protein, putative
ZT0	Medtr3g090160	69.86840206057178	4.28	1.8782381509618138	0.23782558875055207	7.897544418283097	2.724094530525675e-14	translocon at the outer envelope membrane ofs protein
ZT0	Medtr0022s0290	129.9774744385567	2.33	1.8715363532937874	0.2509735264354941	7.457106651345614	7.297323628751085e-13	cytochrome P450 family 71 protein
ZT0	Medtr7g021130	12.223707296631375	0.38	1.870670932740567	0.5916581116627699	3.161743067264498	0.003438121699520139	serine carboxypeptidase-like protein
ZT0	Medtr1g037680	13.76768436941937	0.62	1.8674412757963879	0.6789800997077806	2.7503623104713926	0.011581337165656829	thioredoxin-like protein
ZT0	Medtr1g018590	203.47662463075673	8.92	1.8655191097471207	0.16615857379412005	11.227341852720794	8.304972601679326e-28	3-oxo-delta(4,5)-steroid 5-beta-reductase-like protein
ZT0	Medtr4g070660	24.439715031817787	2.96	1.8651205634896744	0.3652508377225931	5.1064100909912975	1.2941262967240079e-6	transmembrane protein, putative
ZT0	Medtr2g020750	40.60971804143112	0.89	1.8634903033170411	0.31337500516860933	5.946518620125439	1.4173375171124372e-8	inosine-uridine preferring nucleoside hydrolase
ZT0	Medtr2g010430	2928.4027271730065	159.34	1.861192381966714	0.12120021422443891	15.356345645727593	2.8742688794690256e-51	inorganic pyrophosphatase
ZT0	Medtr5g017550	618.5944098595661	42.98	1.8560195722855677	0.12155865240877062	15.268510595562125	1.0856329173907306e-50	EF hand calcium-binding family protein
ZT0	Medtr7g075120	52.469147937118386	19.05	1.8529284797812304	0.2725763886395835	6.797831936321092	7.145763140553158e-11	hypothetical protein
ZT0	Medtr8g078250	203.10457479532562	10.73	1.8528838134870977	0.2794447210148434	6.630591577318353	2.1343598459826724e-10	PQ-loop protein/transmembrane family protein
ZT0	Medtr4g109490	296.2592263362428	31.71	1.852343464618684	0.18393644644944215	10.070562416393262	1.4235913147937851e-22	carbohydrate-binding X8 domain protein
ZT0	Medtr6g092540	1030.8934291396233	73.26	1.8508116976544955	0.12975281991359203	14.2641346745838	2.4249565738733234e-44	MYB-like transcription factor family protein
ZT0	Medtr5g027510	98.75854190457383	2.75	1.848589232786555	0.2153040996359243	8.585945348520948	1.0703122999222627e-16	ERD (early-responsive to dehydration stress) family protein
ZT0	Medtr1g046510	56.28334416746501	2.75	1.8479388209005267	0.27271868341759026	6.77598908055353	8.258801451112811e-11	hydroxyethylthiazole kinase family protein
ZT0	Medtr7g100340	29.239770247325247	0.67	1.8470460401385242	0.7733991145047261	2.3882184573243874	0.02983306483694417	hypothetical protein
ZT0	Medtr6g007750	216.2741103295966	10.99	1.84239676493719	0.13264595453456704	13.889581264666976	4.536863152691412e-42	nodulin MtN21/EamA-like transporter family protein
ZT0	Medtr2g093740	39.09644634469511	0.81	1.8419878193355392	0.3002037656557068	6.135791852284927	4.641298208601375e-9	auxin response factor-like protein
ZT0	Medtr1g072690	927.0907381029284	35.99	1.8357186516871717	0.13915220546387644	13.192163541839944	5.00750632117552e-38	peptidoglycan-binding domain protein
ZT0	Medtr8g102380	96.13568555977618	2.81	1.8355969339824667	0.4273370742596165	4.2954310415559736	5.35556762284022e-5	pectinesterase
ZT0	Medtr5g057990	875.4665777348425	7.22	1.8352970304456875	0.21893688765758618	8.38276751844606	5.718174600644274e-16	alpha-glucosidase
ZT0	Medtr3g111380	301.11710170583376	8.57	1.8338634275354924	0.20988546106768788	8.737448597947777	2.9594857897290614e-17	rhamnogalacturonate lyase B-like protein
ZT0	Medtr1g056190	33.90313544983717	8.42	1.8320083575895494	0.30669803209097424	5.973329352977818	1.2123248170301706e-8	hypothetical protein
ZT0	Medtr8g068690	145.2511975294166	11.74	1.831798000187262	0.25066471073364266	7.307761809893289	2.1385705955976505e-12	caffeic acid O-methyltransferase
ZT0	Medtr7g109590	8.430386007260166	0.45	1.8271210978584493	0.703450582828418	2.5973695131675103	0.017564986312721735	transmembrane protein, putative
ZT0	Medtr7g056330	51.292909065324885	2.17	1.8234656452793336	0.3167501855378071	5.756794245229214	4.16139127282917e-8	mediator of RNA polymerase II transcription subunit 33A
ZT0	Medtr4g082990	9.422533634493554	0.32	1.8213416686262707	0.6087938590750549	2.9917214858136854	0.005770532285930693	UDP-glucose 6-dehydrogenase family protein
ZT0	Medtr1g090693	506.699127226931	7.05	1.8199487247070805	0.12165604405640112	14.95978879490222	1.081221816202986e-48	alpha-1,6-glucosidase, pullulanase-type protein
ZT0	Medtr2g084010	6.442484228709268	0.35	1.8171792580817165	0.8069694310001218	2.251856375562561	0.041454486244822314	lignin biosynthetic peroxidase
ZT0	Medtr4g064380	57.041651144327766	1.14	1.816704333892985	0.36774884840099364	4.940068043155499	2.9166209077352643e-6	haloacid dehalogenase-like hydrolase
ZT0	Medtr6g033675	76.85966275479271	1.22	1.8110189403468404	0.32351442414473336	5.597954233832336	1.0066569128338656e-7	UDP-glucosyl transferase 88A1
ZT0	Medtr5g048470	64.39131246671926	3.41	1.8099109338047183	0.2973106144659325	6.087609542820773	6.19787187294474e-9	flavonol synthase/flavanone 3-hydroxylase
ZT0	Medtr6g092660	23.27365380377685	2.19	1.803655658492817	0.41817016963824005	4.31320976351126	4.9717620908129184e-5	homotetrameric cytidine deaminase
ZT0	Medtr8g027770	1120.0634740117866	14.1	1.7934745298851413	0.1308001265933814	13.71156570406479	5.138008857334664e-41	DEAD-box ATP-dependent RNA helicase family protein
ZT0	Medtr4g107580	84.44125939565271	1.71	1.7851089003572072	0.23471178087055672	7.605536005632767	2.4634414526609257e-13	peptide/nitrate transporter
ZT0	Medtr8g103220	10.470580222784962	2.03	1.7850244510300015	0.5613681855984893	3.1797748729328865	0.0032469138978512167	transmembrane protein, putative
ZT0	Medtr8g071110	25.422129084143673	0.75	1.7819039393460319	0.4315813253351384	4.128779061425607	1.064985903399366e-4	prli-interacting factor L-like protein
ZT0	Medtr4g095065	204.6188867848417	4.9	1.7809750348240523	0.14697625237522308	12.117433980268537	3.145472525052181e-32	pentatricopeptide (PPR) repeat protein
ZT0	Medtr2g047975	358.77080389500196	29.57	1.7796074398881314	0.15359687276719267	11.586221827481403	1.5150953130402847e-29	transmembrane protein, putative
ZT0	Medtr3g078860	140.16488322934575	5	1.7790911924368888	0.25339506006210755	7.021017663094264	1.5830628224400845e-11	superoxide dismutase
ZT0	Medtr2g082930	1259.4480398646187	110.62	1.7756646724260896	0.10434539018679735	17.017183693954518	8.655768574205762e-63	hypothetical protein
ZT0	Medtr2g072270	58.736369163345756	1.01	1.7738715709502895	0.3668852908189242	4.834948730135332	4.82000682205926e-6	cytochrome P450 family monooxygenase
ZT0	Medtr8g039530	134.6675463464146	3.44	1.7690888235024502	0.1902238719980583	9.300035820533125	2.1006775996686885e-19	inositol polyphosphate multikinase beta-like protein
ZT0	Medtr8g056860	355.867482104696	5.32	1.7688606951196288	0.21690252211423022	8.155095099300278	3.6286143414739555e-15	ATP-dependent zinc metalloprotease FTSH protein
ZT0	Medtr1g090300	85.32652412451995	2.61	1.7644644081557768	0.2243050519622731	7.866360533210595	3.4524956472181055e-14	6-phosphofructokinase
ZT0	Medtr2g086530	246.19956733241622	10.35	1.7632123773241064	0.17246628168433442	10.223519403933805	3.1126179137964676e-23	glycoside hydrolase family 17 protein
ZT0	Medtr2g091325	21.111880100849653	0.34	1.762907007874982	0.5390151856793566	3.270607312580764	0.002432650843748935	hypothetical protein
ZT0	Medtr7g012120	130.73896781279055	2.43	1.7614806085767392	0.2800835252127378	6.28912609993324	1.840940836139084e-9	UDP-glucosyltransferase family protein
ZT0	Medtr5g031430	3.748819452533059	0.04	1.759832512891519	1.5174203802257729	1.1597527855989902	0.316250005818981	cinnamyl alcohol dehydrogenase-like protein
ZT0	Medtr3g006290	478.9328481932304	14.92	1.7593027552017222	0.14572838879842476	12.072477913930928	5.334545130023282e-32	rhodanese-related sulfurtransferase
ZT0	Medtr8g063760	114.44782290523855	3.42	1.7580598145794488	0.19969300123463143	8.80381287130738	1.678668314692562e-17	NHL repeat protein
ZT0	Medtr7g117405	122.0456831710706	2.05	1.7558501999562128	0.22731234453447216	7.724394394647301	1.0133942145949692e-13	UDP-glucosyltransferase family protein
ZT0	Medtr0067s0010	41.99964565214223	1.94	1.7557878488802297	0.30012877911459146	5.850114920868206	2.455995376939236e-8	DUF247 domain protein
ZT0	Medtr1g034320	6.306105271631575	0.08	1.7554000577878286	1.0600424151304773	1.6559715278673655	0.14229965792901478	fatty acid hydroperoxide lyase
ZT0	Medtr1g101020	166.0337742558091	8.86	1.7548329864749685	0.1985181451116039	8.839660402269162	1.2346364436168487e-17	pectinacetylesterase family protein
ZT0	Medtr5g097010	5330.300695918993	41.56	1.7527262856093926	0.10981089776233866	15.9613145992375	2.494508249295221e-55	glucose-1-phosphate adenylyltransferase family protein
ZT0	Medtr4g118770	6.721497091587386	0.22	1.7515535374595357	0.7976305192897977	2.195945986393677	0.047192231975182033	Na+/H+ exchanger 1
ZT0	Medtr1g022255	90.50874485931837	2.1	1.7499686076813712	0.19042864231540502	9.189629177647111	5.675018710123533e-19	methyltransferase PMT16, putative
ZT0	Medtr7g055710	20.638232726785066	0.45	1.7493087872612532	0.4658877307485971	3.754786125083035	4.549260470685847e-4	UDP-glucosyltransferase family protein
ZT0	Medtr6g086510	89.55946118020576	4.3	1.7489792632822847	0.20952308986717136	8.347429700426156	7.65425745533716e-16	nudix hydrolase-like protein
ZT0	Medtr3g093570	491.34919575775666	16.66	1.7437745058386163	0.13585193354630695	12.835846059152535	4.755019983756557e-36	alpha/beta fold hydrolase
ZT0	Medtr2g072790	285.6150838023149	8.9	1.7428634214143994	0.14491223673983847	12.027027258873723	9.154691090212897e-32	caffeic acid O-methyltransferase
ZT0	Medtr7g069440	57.61959611638897	1.54	1.742248408936982	0.2962041520519059	5.881917579034057	2.047641350378559e-8	transporter TRS120
ZT0	Medtr4g109830	16.4635918610531	0.78	1.7271333840821406	0.5996783399334228	2.8800996618852195	0.008008780313825264	MADS-box transcription factor
ZT0	Medtr3g101420	12.548447525386065	0.48	1.7190055339480148	0.5807762764945472	2.959841170379063	0.006336632490141398	gibberellin receptor GID1
ZT0	Medtr0110s0040	2057.226362601047	58.62	1.716231107408946	0.10678567696867762	16.071735050313453	4.337749216373693e-56	glycoside hydrolase family 1 protein
ZT0	Medtr7g084250	383.9174403351487	22.67	1.7152469881767411	0.1369048179702486	12.528755478492286	2.1786949669060453e-34	tyrosine kinase family protein
ZT0	Medtr5g019120	17.438575465875797	0.44	1.714626418456441	0.5626998310133201	3.0471422309985603	0.004882224998939265	PQ-loop protein/transmembrane family protein
ZT0	Medtr3g037390	125.0048508547185	2.75	1.7118734790889425	0.19089612420282237	8.967565403633442	4.064844852605211e-18	timing of cab expression 1/PRR response regulator
ZT0	Medtr2g063080	851.1354315480644	10.55	1.7116298735327278	0.16180744474439304	10.578189873998609	8.529365277188587e-25	DEAD-box ATP-dependent RNA helicase
ZT0	Medtr2g082580	2260.489324939557	183.16	1.7113800183317958	0.10996704659980668	15.56266237248209	1.2423458377059162e-52	oxygen-evolving enhancer protein
ZT0	Medtr4g071420	426.62794848729817	8.21	1.7107380239697987	0.12824718429523588	13.339380769807272	7.357271164169239e-39	MATE family efflux protein
ZT0	Medtr5g092570	132.97801239756504	1.61	1.7099156892349916	0.2133388238864596	8.015023510887172	1.0922828836760896e-14	heat shock 70 kDa protein
ZT0	Medtr7g076660	744.3981315509509	16.35	1.7090677205627718	0.13453596652888264	12.703426188980204	2.512782361074225e-35	NAD(P)-binding rossmann-fold protein
ZT0	Medtr5g097300	58.8351443441075	11.66	1.7061253660073905	0.2491173197423232	6.848682250483977	5.089159861353722e-11	hypothetical protein
ZT0	Medtr4g073090	328.16700160439893	14.45	1.705546684861032	0.10350208711834001	16.478379637996866	6.2677119334940066e-59	3-oxo-delta(4,5)-steroid 5-beta-reductase-like protein
ZT0	Medtr3g095410	13.612068879226346	0.08	1.702856590078382	0.6700275576729826	2.541472467180951	0.020317974181429714	endonuclease or glycosyl hydrolase
ZT0	Medtr4g083080	420.7206140991803	18.03	1.7012037534576094	0.1497094429398312	11.363369738416097	1.852026022366168e-28	alpha/beta fold hydrolase
ZT0	Medtr2g100100	27.710661112309385	0.49	1.7009338091812114	0.5546766590846678	3.066532152241825	0.004605739389453747	CA-responsive protein, putative
ZT0	Medtr1g084140	3114.3208458822946	69.63	1.6964277048606942	0.09711581695659367	17.468088700926234	4.0216627189766127e-66	solute carrier family 40 protein
ZT0	Medtr5g079330	11.60483152269098	10.35	1.6959106580411196	0.48642970786979506	3.4864454834963987	0.0011807200467331914	hypothetical protein
ZT0	Medtr3g117120	205.99305178541883	29.47	1.6953519560329224	0.16742665769791715	10.125938003802206	8.232206381440336e-23	BZIP transcription factor bZIP124
ZT0	Medtr4g081665	26.14455267785799	0.03	1.6918618455680752	1.2522293557194375	1.3510798463880904	0.2379716460153116	Serine/Threonine kinase family protein
ZT0	Medtr1g089910	5.014307844104034	0.17	1.6898008635604265	1.0530791662115877	1.6046285196576635	0.15602615986896748	E3 ubiquitin ligase-like protein
ZT0	Medtr3g014380	11.189203094455985	0.45	1.6881164157111903	0.5259856204615028	3.209434535929	0.00295510972836587	translation elongation factor G, putative
ZT0	Medtr8g079840	521.4642141297331	13.12	1.6880476083226774	0.180070045909537	9.374394279716645	1.0689996217501066e-19	transcription factor
ZT0	Medtr4g077900	2541.4511871160475	47.75	1.6847596503911941	0.0956951386560497	17.605488367038237	3.776628324426897e-67	acyl:CoA ligase
ZT0	Medtr4g100975	39.692131729817454	9.44	1.6833094832059223	0.3036434655521676	5.54370396262231	1.3513724739410855e-7	transmembrane protein, putative
ZT0	Medtr4g094285	170.02404446767702	4.58	1.681170704682626	0.3365061281583908	4.995958658712189	2.2272386563088414e-6	beta-xylosidase/alpha-L-arabinofuranosidase-like protein
ZT0	Medtr6g005460	37.38052749550458	0.15	1.6795927894208662	0.5074072629162188	3.3101473159208488	0.0021361033159833847	polyribonucleotide nucleotidyltransferase
ZT0	Medtr3g087700	700.2097899398605	18.69	1.6794537924562054	0.15897791337382502	10.56406991898989	9.884022320319696e-25	DUF581 family protein
ZT0	Medtr1g105640	54.0181201369861	0.57	1.6767276183716273	0.3189443220084318	5.257117003410082	6.071894885788437e-7	cysteine-rich receptor-kinase-like protein
ZT0	Medtr3g115120	234.54827581413844	5.93	1.6763815382560097	0.1525949890752662	10.985822984194773	1.1541663421892523e-26	DUF630 family protein
ZT0	Medtr2g438010	136.41350105720417	3.46	1.674864439717139	0.23754209329248474	7.050811148889239	1.2914686720743142e-11	mTERF protein
ZT0	Medtr6g060230	207.850009171767	4.84	1.6726048298264917	0.15998667520162793	10.454650849631959	3.0172569746755805e-24	LRR receptor-like kinase
ZT0	Medtr3g449590	1469.9886807113398	30.79	1.6723427626148364	0.08021783292679811	20.84751858281829	6.45484772976776e-94	polygalacturonase/glycoside hydrolase family protein
ZT0	Medtr7g084740	66.10079927413355	3.07	1.6687771399055138	0.29231453881207015	5.708840712087794	5.4466387030249354e-8	plant/MAC12-16 protein
ZT0	Medtr5g012790	23.357778720357594	0.84	1.6682792403779982	0.386087316941768	4.320989494274473	4.808492072264475e-5	electron transporter, putative
ZT0	Medtr4g132040	33.89587471943294	0.4	1.6676887117381816	0.4492564023764251	3.7121089491805406	5.322696714368999e-4	calcium-dependent kinase
ZT0	Medtr3g107397	248.41148091610887	49.59	1.6676697067853041	0.153027054551733	10.897874965119481	2.954480124237618e-26	chaperon protein P13.9, putative
ZT0	Medtr3g026310	17.855053935374166	0.69	1.665200094780784	0.4315770826131675	3.8584071348231	3.0806902793562013e-4	HXXXD-type acyl-transferase family protein
ZT0	Medtr1g097270	1435.3542740421885	89.47	1.6635941818754527	0.12290393470217517	13.535727606335211	5.439662433634501e-40	integral membrane protein, putative
ZT0	Medtr3g072390	23.540040341679322	1.85	1.6631292948831005	0.4351660908826067	3.8218264927534467	3.540552917135777e-4	adenine nucleotide alpha hydrolase superfamily protein
ZT0	Medtr7g016040	102.04272213859483	6.47	1.6603190355846391	0.22241158160258018	7.465074541627997	6.88098287478784e-13	cytochrome P450 family protein
ZT0	Medtr2g034750	106.50385864299172	7.18	1.6595970372239595	0.30482474085525874	5.444430240693596	2.3020658079650556e-7	cAMP-regulated phosphoprotein-like protein
ZT0	Medtr4g066340	56.10560814810948	1.44	1.6575693025404776	0.3039338697987303	5.453716966911735	2.1917618664932444e-7	cyanogenic beta-glucosidase, putative
ZT0	Medtr8g018735	2004.5446663329442	22.99	1.6575521692276587	0.38888009835245224	4.262373354280978	6.155993769029837e-5	seed linoleate 9S-lipoxygenase
ZT0	Medtr4g134400	14.310217953594007	1.53	1.6565593160678258	0.5817158599478772	2.8477121394219105	0.008799092013430222	homeobox/lipid-binding domain protein
ZT0	Medtr6g016245	11.734184312093003	0.34	1.6543812852069346	0.6055379729053846	2.732085119731099	0.01219152424652654	transmembrane amino acid transporter family protein
ZT0	Medtr5g037380	1865.8250178959256	119.54	1.653112091167046	0.07891124065026082	20.94900647290206	8.286989773160859e-95	glutathione S-transferase, amino-terminal domain protein
ZT0	Medtr7g009670	20.555631039470704	0.68	1.652573437003202	0.5144260787945297	3.212460458606079	0.002927616264083486	KDPG and KHG aldolase
ZT0	Medtr1g110870	1108.794465380807	72.3	1.6517542716940572	0.16470319773166123	10.028671540337296	2.1546196963095126e-22	zinc finger constans-like protein
ZT0	Medtr3g079820	414.621993265518	77.13	1.6503850252743428	0.15481112395888752	10.66063589663381	3.633453951157821e-25	DUF3148 family protein
ZT0	Medtr1g032500	28.44839008424461	0.71	1.6499088680881002	0.36696960354229224	4.4960368710700385	2.250800143615315e-5	cleavage and polyadenylation specificity factor, putative
ZT0	Medtr0121s0060	45.331734384865	0.71	1.648649749707428	0.4704475633503507	3.5044282894492302	0.0011102536719621613	stress responsive A/B barrel domain protein
ZT0	Medtr4g077930	19.98984130770117	0.21	1.648149871929396	0.46196884259870263	3.5676645694503915	8.92099406215856e-4	ABC transporter B family protein
ZT0	Medtr1g016235	592.0161254531541	110.94	1.6460845195794684	0.18196293320433599	9.046262832722043	2.0295704144663717e-18	hypothetical protein
ZT0	Medtr6g014050	192.69460540762597	5.19	1.640731261511744	0.17554519733240057	9.346489032137779	1.3795225062764072e-19	UDP-glucosyltransferase family protein
ZT0	Medtr8g009290	457.7880253213032	8.82	1.637485390361767	0.20416500661910955	8.020401818499002	1.0484158967432604e-14	pigment defective 320 protein, putative
ZT0	Medtr7g033165	67.81454848933701	1.94	1.6334380231504357	0.2505762194655774	6.518727222536085	4.38146697387436e-10	GDSL-like lipase/acylhydrolase
ZT0	Medtr8g087480	19.985738283754788	1.07	1.6326067652686265	0.7320172347007834	2.230284599700668	0.04359301950434372	hypothetical protein
ZT0	Medtr4g113290	133.5826826428551	6.35	1.629996819177656	0.30724271577311085	5.305241541938972	4.751970743075364e-7	potassium channel AKT1 protein, putative
ZT0	Medtr6g009110	66.70994428801119	0.79	1.6296369172815988	0.2284163137264636	7.134503182785557	7.246087211155904e-12	ABC transporter B family protein
ZT0	Medtr2g450710	175.4559393674611	2.18	1.6284876017589425	0.22216012040980693	7.330242704023378	1.8248502425210796e-12	nodulin-like/MFS transporter
ZT0	Medtr2g015560	42.429142965356974	0.81	1.6281632520987963	0.3227032508234287	5.045388442614937	1.750318443880067e-6	pyruvate decarboxylase
ZT0	Medtr8g089800	1435.749342705971	30.75	1.628013216650967	0.1192020930912115	13.657589178448719	1.0663407378732308e-40	cytochrome P450 family 88 protein
ZT0	Medtr3g117680	114.29778305488776	6.52	1.6252852592841127	0.16242904538763048	10.006124553680863	2.6887813242923765e-22	calcium-binding EF-hand protein
ZT0	Medtr1g070435	1291.6860686866066	113.83	1.6241127726703677	0.08849638592072023	18.352306207457264	6.842728295887734e-73	linker histone H1 and h5 family protein
ZT0	Medtr2g015510	49.841480067055706	5.07	1.6232824030400175	0.23372500938430774	6.945266179756134	2.6470134229812294e-11	GDSL esterase/lipase plant-like protein
ZT0	Medtr7g059540	3.499908634944207	0.07	1.619805646948553	1.1679567743011723	1.3868712289611376	0.22499178513371546	DUF247 domain protein
ZT0	Medtr8g064180	263.989701860583	18.03	1.6182256696972266	0.31000326450996324	5.2200278350462925	7.339939478980445e-7	xyloglucan endotransglucosylase/hydrolase family protein
ZT0	Medtr1g101030	2921.949495608519	26.64	1.6180308717358518	0.15822897383452467	10.22588235595829	3.039757689937911e-23	tripeptidyl peptidase II
ZT0	Medtr5g087710	170.42864128724761	5.09	1.6157124966406586	0.37124111314573693	4.352191714300737	4.2135285209926784e-5	zinc-binding alcohol dehydrogenase family protein
ZT0	Medtr7g061550	272.9674481924658	8.9	1.6147973377701377	0.17113871509439765	9.435605128152556	6.091030741253506e-20	myb transcription factor
ZT0	Medtr6g008480	3.107254487094304	0.1	1.6116670155497954	1.1641698072715871	1.3843916973993575	0.2258603712134765	matrix metalloproteinase
ZT0	Medtr8g080180	68.86074691921597	3.32	1.6093341131839454	0.2669891588251179	6.027713335874003	8.843905914431302e-9	carboxy-terminal region remorin
ZT0	Medtr4g005270	29.833085645898926	0.48	1.607021469783175	0.38752370723607027	4.146898472986107	9.876982217202507e-5	beta-amyrin synthase
ZT0	Medtr1g492730	1215.4822933747541	27.83	1.6051052889601034	0.10436973838662256	15.379029532623946	2.0381141571083875e-51	OTU-like cysteine protease
ZT0	Medtr0245s0010	336.97576499806655	2.52	1.6042394817024244	0.2682695010270553	5.979954767726782	1.1674426304546422e-8	DNA topoisomerase I, bacterial protein
ZT0	Medtr6g023320	984.1796820294404	29	1.6032959389950525	0.10362714793608103	15.471775214579797	4.9707365872765815e-52	rubisco methyltransferase family protein
ZT0	Medtr3g106140	4.752338770565343	0.07	1.6002770119922052	1.074904660292192	1.4887618140544678	0.19024119298791084	armadillo/beta-catenin-like repeat protein
ZT0	Medtr4g102280	241.99965903849707	1.88	1.5993554944858548	0.2337182735057407	6.843091344530964	5.284291183910004e-11	cytochrome P450 family protein
ZT0	Medtr4g081520	90.37114724376679	4.89	1.5990446135506546	0.2764322931698062	5.784579635087703	3.562510159397213e-8	RNA-binding (RRM/RBD/RNP motif) family protein
ZT0	Medtr4g127660	83.95101899572701	0.83	1.5985862094714742	0.289429720005744	5.523227571238188	1.5098647939323088e-7	actin filament bundling protein P-115-ABP
ZT0	Medtr6g027720	111.99754593531814	2	1.5952937587446312	0.2015697844287106	7.914349679273683	2.3947255242617333e-14	LRR receptor-like kinase
ZT0	Medtr4g008530	31.59423688286994	2.55	1.5942030466128374	0.3852676520359366	4.137910458322452	1.0256884900188979e-4	PPPDE thiol peptidase family protein, putative
ZT0	Medtr3g073790	296.81461923307063	3.47	1.588865953853322	0.15252804508001078	10.41687745371587	4.443970235086158e-24	tRNA modification GTPase trmE
ZT0	Medtr5g091310	14.768853609514405	2.15	1.588726111122403	0.6250627378533806	2.541706639846233	0.020306986480424706	transmembrane protein, putative
ZT0	Medtr3g078270	1177.4238882065422	33.69	1.586623454517076	0.1034607276103242	15.335514172034	3.9376055978933626e-51	nucleobase-ascorbate transporter-like protein
ZT0	Medtr3g467340	240.79757281255294	3.31	1.5856531989188725	0.15715249481378368	10.089901536706604	1.1747445656857987e-22	LRR and NB-ARC domain disease resistance protein
ZT0	Medtr8g027605	564.3850202356994	6.91	1.5847692195094476	0.11280026611179432	14.049339368923219	4.965946115757042e-43	embryo defective 1703 protein, putative
ZT0	Medtr1g108840	81.22638856545068	0.97	1.5845214503033502	0.2879250629659912	5.5032425242206475	1.6816211997880195e-7	MATE efflux family protein
ZT0	Medtr1g069240	1709.1714418115546	43.39	1.582526209863416	0.07586116452860882	20.860821471658436	4.957791420830007e-94	plant/F16A16-150 protein, putative
ZT0	Medtr3g449390	61.877384178838824	1.01	1.582426320254344	0.2731300471610116	5.793673514512651	3.384246109560151e-8	LRR receptor-like kinase family protein
ZT0	Medtr5g032020	100.05996868616819	2.39	1.5817030491740325	0.21085994326028842	7.501202099924481	5.303286200218955e-13	nucleobase-ascorbate transporter-like protein
ZT0	Medtr2g031560	527.2471972570979	12.25	1.5815853101204869	0.10586053494500973	14.940273171130833	1.441273161554278e-48	reticuline oxidase-like protein
ZT0	Medtr1g024980	206.2148467227062	6.72	1.5792703650140478	0.1435815047368523	10.999121146615932	1.0023601211010458e-26	C2H2-like zinc finger protein
ZT0	Medtr4g052010	858.8317248877346	51.17	1.5785731302412889	0.12378958445723431	12.752067447052783	1.371323697482816e-35	FAM210B-like protein
ZT0	Medtr1g109660	229.01355185820893	19.5	1.576907746319446	0.12325928731602914	12.79341930865098	8.15086136850172e-36	fiber protein Fb34
ZT0	Medtr2g026575	80.35704603420115	6.95	1.5761746869419853	0.22030977298679197	7.1543566387156154	6.3205775142781975e-12	hypothetical protein
ZT0	Medtr5g090120	202.46465970678665	1.92	1.5759974669936958	0.20393055384101813	7.728108600255776	9.852012065741473e-14	DEAD-box ATP-dependent RNA helicase-like protein
ZT0	Medtr2g105090	14425.063461703936	804.75	1.5741495756863315	0.11227573056522412	14.020390406383184	7.437066903777292e-43	DS12 from 2D-PAGE of leaf protein, putative
ZT0	Medtr4g028310	793.9434020132888	115.36	1.5728569648464192	0.09580281921137705	16.417648016976464	1.6893325592768467e-58	Lipid transfer protein
ZT0	Medtr5g034250	6379.740039170769	314.91	1.5725205054677047	0.15016428034642526	10.472001076687073	2.5237191517481627e-24	carbonic anhydrase family protein
ZT0	Medtr2g009660	293.3981390976076	27.42	1.5689093455254197	0.13790189382682883	11.376996370300668	1.5908176094452882e-28	costars family protein abracl protein
ZT0	Medtr1g109620	463.774410215073	5.46	1.5682410275542242	0.14136241882298764	11.093761981520402	3.588762422104378e-27	trehalose-6-phosphate synthase domain protein
ZT0	Medtr7g091680	65.79358717782486	1.31	1.5664067551592316	0.21351271896220325	7.336362736481859	1.746270996546055e-12	LRR receptor-like kinase family protein
ZT0	Medtr7g033230	2854.31272813956	63.71	1.5566234862037285	0.16957462192739312	9.179578102613899	6.208597481315853e-19	Pmr5/Cas1p GDSL/SGNH-like acyl-esterase family protein
ZT0	Medtr6g018680	91.24858931660708	1.58	1.5524006252009288	0.2677266687601783	5.7984534465317825	3.29316958193888e-8	phosphoglycerate kinase
ZT0	Medtr2g094930	39.48295960140377	0.86	1.5519320969816568	0.3145361911722126	4.934033477031437	3.0011774168627517e-6	zinc finger, C3HC4 type (RING finger) protein
ZT0	Medtr2g037600	84.42091689337279	2.68	1.5515062652671432	0.21458624660428693	7.230222299047136	3.716512299198141e-12	core-2/I-branching enzyme
ZT0	Medtr3g088425	583.1073236816244	7.77	1.551445135728087	0.10615115729784004	14.615433078840825	1.6021648588731137e-46	DPP6 amino-terminal domain protein
ZT0	Medtr1g087200	296.68700995402196	49.89	1.5494346407004194	0.23778545470105072	6.5161035297487135	4.45585816964022e-10	universal stress family protein
ZT0	Medtr7g079550	43.4910923717191	0.94	1.5478584379768596	0.30323558877532614	5.104474854776039	1.3061768282682779e-6	LRR receptor-like kinase
ZT0	Medtr8g094600	1426.4701588238813	10.55	1.5472370351143183	0.10603478142747454	14.591787848146737	2.2552611502872878e-46	NAD-dependent aldehyde dehydrogenase family protein
ZT0	Medtr7g105450	23.04093568012544	2.31	1.5465073471207325	0.3699488147422876	4.180327887245848	8.631086998009891e-5	hypothetical protein
ZT0	Medtr5g025800	92.96957135230717	5.96	1.5430665603653309	0.2636634211094937	5.852410447653749	2.4231747251061635e-8	transmembrane protein, putative
ZT0	Medtr2g037850	528.7397279045649	11.96	1.541407968107492	0.10442311438766584	14.761175982408341	1.9431659714912392e-47	subtilisin-like serine protease
ZT0	Medtr5g014840	24.066004289597416	4.1	1.5370268243576137	0.40010336492091186	3.84157435082166	3.286802759857759e-4	epidermal patterning factor-like protein
ZT0	Medtr2g064405	1206.9996726516463	27.31	1.5362969542592966	0.14095957194764452	10.898848038712199	2.92562324222629e-26	cation diffusion facilitator family transporter
ZT0	Medtr2g087890	1256.4856640132884	6.86	1.5324605335849908	0.16519530919329245	9.27665888982285	2.5901209324932894e-19	fatty acid hydroperoxide lyase
ZT0	Medtr1g107460	151.44877235809997	1.33	1.5317814681621134	0.35560128168952837	4.30758140376866	5.093318732132746e-5	LRR receptor-like kinase family protein
ZT0	Medtr4g113840	4.56807101695613	0.38	1.5300097064052924	1.039790218873589	1.4714599912882054	0.19603213628038904	zinc finger (Ran-binding) family protein
ZT0	Medtr7g100550	2557.2087040588476	23.1	1.5266845106260163	0.08382076348194557	18.213679370205853	8.376863090428507e-72	PPR containing plant-like protein
ZT0	Medtr3g105050	755.2235990538737	47.19	1.5251461111321554	0.13231418308256113	11.526701639993483	2.939258194156824e-29	hypothetical protein
ZT0	Medtr4g074870	175.8489149669375	1.73	1.5246198666088324	0.19186541002983484	7.946298743331359	1.8680795990643312e-14	P-loop nucleoside triphosphate hydrolase superfamily protein
ZT0	Medtr8g015480	120.05973528469714	3.43	1.5228204001857513	0.2333653519003635	6.525477701745231	4.194949589365621e-10	early flowering protein, putative
ZT0	Medtr3g113930	39.172409636656084	6.82	1.522693129777514	0.28324135187017113	5.375956299189916	3.296511526953883e-7	transmembrane protein, putative
ZT0	Medtr3g099120	185.9190238873314	2.8	1.5222886270585758	0.17338891641863413	8.779619011996866	2.0701634063141e-17	non-specific phospholipase C4
ZT0	Medtr4g116350	1671.7822707379207	92.5	1.5218730437813361	0.1193274285622978	12.753757137964346	1.3440408209867586e-35	chlororespiratory reduction protein
ZT0	Medtr1g077140	13.767274626166065	0.31	1.520497680421699	0.7550637464462998	2.0137341881104827	0.07037511654107818	hypothetical protein
ZT0	Medtr1g007490	168.60517167180393	5.75	1.5198601094548467	0.2769970124741383	5.486918778940793	1.8356039624750365e-7	hypothetical protein
ZT0	Medtr3g078210	6.447158448707743	0.15	1.5184052923379554	0.653254382265552	2.32437061818395	0.03485612313416218	trehalose-6-phosphate synthase domain protein
ZT0	Medtr2g078750	129.1714653181101	4.14	1.5182224631075483	0.1717412628978189	8.840172929267714	1.2295396405451888e-17	Serine/Threonine-kinase WNK (WNK)-like protein
ZT0	Medtr3g098170	126.59030251600188	18.28	1.5181491955928883	0.16665078228718322	9.10976339118959	1.1570815639288209e-18	acyl-coenzyme A thioesterase-like protein
ZT0	Medtr1g025720	132.7514987098469	4.83	1.5153807842512848	0.25669135366193635	5.903513159414976	1.8130564576479462e-8	GDSL-like lipase/acylhydrolase
ZT0	Medtr5g007713	481.8414330099448	1.12	1.5141197922228986	0.32553763071352615	4.651135995873016	1.1263325138754322e-5	chalcone and stilbene synthase family protein
ZT0	Medtr3g109540	347.09497929029567	10.28	1.5131428749840963	0.16029673862421054	9.439636064782404	5.87088122845585e-20	ribosome biogenesis GTP-binding protein YsxC
ZT0	Medtr2g076320	23.289679135955545	1.21	1.512197649451783	0.4482312419604033	3.3736997957526804	0.0017293144140510426	mTERF protein
ZT0	Medtr3g024060	2.44324931396683	0.16	1.5103380586022164	1.3804241083154078	1.0941116208448056	0.34667778994121295	coatomer subunit beta-like protein
ZT0	Medtr1g086000	131.96534786877663	16.03	1.5092142976564653	0.23631474822178258	6.386458352739204	1.0061533789091538e-9	plastid transcriptionally active protein
ZT0	Medtr1g073700	1746.418653811321	16.56	1.5082911637482068	0.13579294571670975	11.107286580959757	3.108009961894618e-27	cyclopropane-fatty-acyl-phospholipid synthase
ZT0	Medtr2g090765	621.9484606982207	70.16	1.506913334280565	0.20627364059659434	7.305409115397388	2.173929190634733e-12	fasciclin-like arabinogalactan protein
ZT0	Medtr0246s0020	70.4111041681361	2.47	1.5067802619923538	0.255607652402711	5.894894960415406	1.9041470241733716e-8	basic helix loop helix (bHLH) DNA-binding family protein
ZT0	Medtr8g035910	9.821549861637324	0.24	1.5047620032183733	0.6126681567749214	2.45607999465718	0.02520843614294755	growth-regulating factor 4
ZT0	Medtr7g451010	452.0916843053612	10.3	1.5036718088754986	0.13375201591551894	11.242236601691706	7.057264407350351e-28	dynamin-like protein 1E
ZT0	Medtr6g014250	1225.1980866321658	31.08	1.5026506942176676	0.14475915138856718	10.380350256297124	6.4186732295536296e-24	UDP-glucosyltransferase family protein
ZT0	Medtr2g090235	7.039622461465768	0.24	1.5016893908213182	0.6760623833507832	2.2212290282717126	0.04452090443233063	ethylene response factor
ZT0	Medtr6g014200	157.2585745800394	3.78	1.500531344526343	0.15325656946299582	9.790975680743331	2.184164937955391e-21	UDP-glucosyltransferase family protein
ZT0	Medtr3g048290	23.764232280625485	0.78	1.4997413308496061	0.3695159976532823	4.058664145460941	1.4119297768559074e-4	F-box/RNI/FBD-like domain protein
ZT0	Medtr8g080880	49.224577477492375	1.13	1.4995854751886961	0.27602390343793537	5.4328101896649015	2.447310781537165e-7	amidase C869.01-like protein, putative
ZT0	Medtr4g088920	773.4463936321483	10.69	1.499207315393617	0.08503870081607627	17.62970625146471	2.5212580821902494e-67	DNA mismatch repair protein MutS2
ZT0	Medtr7g011800	10.881103901460822	0.12	1.4978751937583645	0.6317443840199272	2.371014656635423	0.03113188202676886	cyclin-dependent kinase C
ZT0	Medtr7g106440	2748.620248913306	108.88	1.4963104874834892	0.0877968879426837	17.04286475917373	5.608828357413277e-63	33 kDa ribonucleoprotein
ZT0	Medtr4g108890	7.883603706326962	0.17	1.4947742658739933	0.779147941430747	1.918472970780291	0.08579527447153787	PPR containing plant-like protein
ZT0	Medtr2g072380	161.7847576688214	4.82	1.4936744321344773	0.17028936062789987	8.771390218548724	2.218393459499816e-17	cytochrome P450 family 72 protein
ZT0	Medtr3g115970	1131.8957812244855	88.77	1.4930780015814018	0.0830494629159901	17.978177692632965	5.571305759716406e-70	FKBP-type peptidyl-prolyl cis-trans isomerase
ZT0	Medtr6g087680	264.44600842188305	9.66	1.4928332152839057	0.2155040507718616	6.927170092335105	2.9923981554345876e-11	ABIL1-like protein
ZT0	Medtr4g056580	18.82841338685703	1.64	1.4907497888954553	0.548525869328476	2.7177383460883653	0.012684744014252972	hypothetical protein
ZT0	Medtr8g106870	269.3046417660794	11.69	1.4893592587186224	0.19846735080444372	7.504303618110649	5.188377745456365e-13	transmembrane protein, putative
ZT0	Medtr3g010110	26.858884982048746	0.63	1.4872806584610803	0.48499756425205787	3.066573459507368	0.004605446141973345	transducin/WD40 repeat protein
ZT0	Medtr2g088770	130.5904066883963	10.65	1.4835887228560385	0.25980198251755715	5.710459591107158	5.398700308745095e-8	peroxidase family protein
ZT0	Medtr1g097420	165.36221498822113	14.25	1.4826496820987087	0.13446151407792342	11.026572861878384	7.471880942527816e-27	RAB GTPase-like protein A1D
ZT0	Medtr2g029350	289.27554581040334	10.91	1.4824293464784741	0.13458524269849043	11.01479862691589	8.469350097011235e-27	haloacid dehalogenase-like hydrolase
ZT0	Medtr3g114070	88.86143234264627	3.12	1.478892672733561	0.28176263458816536	5.248718215937911	6.338713027332203e-7	glutathione S-transferase-related protein
ZT0	Medtr5g096670	12296.76929975557	363.77	1.4787488477893682	0.17529969741298665	8.435547063755621	3.719783319522046e-16	fructose-bisphosphate aldolase
ZT0	Medtr4g132270	604.8063144875836	23.53	1.4761743938793157	0.11375183490233647	12.977147974331226	7.979291549064603e-37	lactoylglutathione lyase-like protein
ZT0	Medtr3g462090	4.2803826872174024	0.62	1.476138434548578	0.8285501170381646	1.7815922105295945	0.11266168326474053	hypothetical protein
ZT0	Medtr3g104570	21.405236204969906	0.6	1.4756462282030718	0.37927913895887866	3.8906601408496155	2.730313821510692e-4	IQ calmodulin-binding motif protein
ZT0	Medtr2g437370	482.487802058914	46.39	1.4746122141829399	0.09689397922024491	15.218821912877289	2.301756753952496e-50	CW-type zinc-finger protein
ZT0	Medtr5g085580	1342.3508210797609	50.63	1.474041314044935	0.1341201524633004	10.990453611721627	1.0984406341569375e-26	O-glycosyl hydrolase family 17 protein
ZT0	Medtr5g064160	99.63214426261703	2.34	1.4718678996716186	0.2235238463670166	6.584836130883657	2.866681055459969e-10	trypsin-like peptidase domain protein
ZT0	Medtr3g086310	23.77441177743213	0.57	1.4715409499963608	0.49745498932074456	2.958138890124899	0.006367140785223451	pectate lyase family protein
ZT0	Medtr8g096110	696.7627479909088	38.31	1.4707399467255131	0.09315522117619907	15.788057053116455	3.7661669225878034e-54	transferring glycosyl group transferase
ZT0	Medtr3g006730	1083.223342866842	18.06	1.4704001101508646	0.14404924787078469	10.207620878866688	3.636531587835225e-23	glycyl-tRNA synthetase/glycine-tRNA ligase
ZT0	Medtr3g051220	1842.6237858369218	74.38	1.469820543900612	0.12037690510399675	12.210153954621077	1.0360715233767527e-32	ubiquitin-conjugating enzyme, putative
ZT0	Medtr8g031000	174.83814580967197	4.8	1.469263324337877	0.18774582345514063	7.825810967714752	4.7118656774463336e-14	bestrophin-like protein
ZT0	Medtr3g094780	129.58642068005028	7.35	1.467987759838994	0.1675075338462318	8.763711853023723	2.3707308409498386e-17	transmembrane protein, putative
ZT0	Medtr3g062890	3046.49522096607	199.54	1.465243387578914	0.08645577374917998	16.947895138036532	2.777764372114729e-62	NADH-quinone oxidoreductase cyanobacterial subunit N
ZT0	Medtr3g098500	760.6746263965501	50.27	1.463715690340827	0.08817486846034561	16.600146004176867	8.409759269864245e-60	transferring glycosyl group transferase
ZT0	Medtr8g102620	422.8368042643523	8.7	1.4622545344555553	0.17995915788813427	8.125479978987888	4.580792771155374e-15	NADP-dependent malic enzyme-like protein
ZT0	Medtr2g102060	2.186767551589001	0.16	1.4573370033346733	1.1875672704746214	1.227161643442932	0.2872075208350952	small GTPase family RAB protein
ZT0	Medtr3g078300	50.61242723758424	3.21	1.4568726890908685	0.2945429535562969	4.946214708247679	2.8323603735705782e-6	DUF4228 domain protein
ZT0	Medtr4g036815	130.97749480392224	3.86	1.4553150584065042	0.15369779731527472	9.468678691739928	4.504826361952539e-20	F-box-like protein
ZT0	Medtr3g408390	5.9348618777214925	0.14	1.4548820846580353	0.7987988082600473	1.821337325010632	0.10427434355619628	PPR containing plant-like protein
ZT0	Medtr8g103380	1308.137825036785	22.35	1.4544672474471716	0.08634052427732916	16.84570784832584	1.4979203818959051e-61	Zc3h12a-like ribonuclease NYN domain protein
ZT0	Medtr4g102770	57.55686245478853	1.38	1.4528155685720419	0.30941752656602495	4.695324097169503	9.212062880732718e-6	F-box protein PP2-A13
ZT0	Medtr8g028080	518.5078855303244	30.75	1.4526140524609819	0.10154942735804949	14.30450264716178	1.3680283414347307e-44	ribonuclease T2 family protein
ZT0	Medtr4g026450	194.85020454642924	2.25	1.4504845270399778	0.16689765023759665	8.690862483534417	4.407152274827038e-17	ubiquinone biosynthesis protein UbiB
ZT0	Medtr3g100460	88.02127695285728	7.66	1.450096375213698	0.1891447252469593	7.666596958071977	1.5639386326307594e-13	PWWP domain protein
ZT0	Medtr8g088030	1879.4056408859756	32.06	1.4484590163138957	0.09860893582487125	14.688922501773556	5.556706058212443e-47	16S rRNA processing protein RimM
ZT0	Medtr3g099140	2106.225086262061	109.09	1.447452864284647	0.08650170746056969	16.733228820303268	9.523201958882792e-61	thylakoid lumenal 17.9 kDa protein
ZT0	Medtr8g103870	562.5644507925331	16.97	1.4461887695498221	0.11439493928230836	12.642069471105362	5.38223642124528e-35	carbon catabolite repressor-like protein
ZT0	Medtr2g070730	123.3884343899779	6.19	1.4446045253955582	0.21320344202859812	6.775709208305304	8.272869379495962e-11	interactor of constitutive active ROPs protein, putative
ZT0	Medtr3g434850	584.6761186546022	14.03	1.4429932423853598	0.0948011292259467	15.221266393843946	2.224100179048032e-50	serine carboxypeptidase-like protein
ZT0	Medtr3g015440	518.2838726271202	25.86	1.4429912156471298	0.12650169232993935	11.406892580405541	1.1368682773186025e-28	TPR domain protein
ZT0	Medtr2g087810	44.05439262334958	0.71	1.442264525385483	0.38922319669708677	3.7054947845462727	5.452664676517428e-4	fasciclin-like arabinogalactan protein 16 precursor
ZT0	Medtr1g103850	324.65596478926534	3.19	1.439977296795587	0.12922095822163668	11.143527463445771	2.0818292275712085e-27	WNK kinase
ZT0	Medtr2g007950	1518.0884221403496	731.38	1.4395400937072276	0.13264265655797924	10.852768868346603	4.7532655138803293e-26	Thionin-like protein
ZT0	Medtr8g009840	762.9983347171169	19.73	1.4383194792170717	0.11376928958345066	12.642422963905855	5.36955438713335e-35	NADP-dependent alkenal double bond reductase P2
ZT0	Medtr8g059125	286.23238260345937	6.1	1.4382169468766604	0.13735091341040925	10.471113086661598	2.5436364043035734e-24	plasma-membrane choline transporter family protein
ZT0	Medtr1g063350	1082.2165168492268	83.15	1.4381845647073441	0.1340950666454556	10.725111674017603	1.8444073316885219e-25	thylakoid lumenal 15.0 kDa protein
ZT0	Medtr8g028145	129.37681463347099	3.66	1.4318807178068107	0.22221294072457068	6.443732363821257	7.033035666106554e-10	dihydrodipicolinate reductase
ZT0	Medtr7g066210	99.10147812477642	4.38	1.4310018419501618	0.22418525763272734	6.383121963775637	1.0272638483725995e-9	legume lectin beta domain protein
ZT0	Medtr1g035730	96.18530362422169	2.47	1.430850854028395	0.23420989960146935	6.1092671849615465	5.447803473843397e-9	xyloglucan galactosyltransferase KATAMARI-like protein
ZT0	Medtr4g006970	302.81077361624546	16.34	1.4298358714772668	0.16985765863548893	8.41784752576665	4.2929968154011933e-16	CBL-interacting kinase
ZT0	Medtr1g061800	830.9058311748314	9.74	1.4285909910192218	0.09590911083047253	14.895258423825629	2.7597490955281657e-48	threonine dehydratase biosynthetic protein
ZT0	Medtr2g083390	275.09728145450964	10.8	1.4275881904371093	0.128678490282538	11.094225517431616	3.573547629445341e-27	UDP-glucosyltransferase family protein
ZT0	Medtr3g093380	896.3505714085687	33.09	1.4274118351131355	0.10529831920205328	13.555884328733915	4.158539861808711e-40	protein translocase, putative
ZT0	Medtr1g090913	342.45832557121815	16.94	1.4256492242413463	0.10302862596069541	13.837408884645516	9.245918722185845e-42	phytol kinase
ZT0	Medtr7g103300	2106.790171114809	87.05	1.4254496991356946	0.12337689832470339	11.553619182289664	2.1749308830907655e-29	sulfite exporter TauE/SafE family protein
ZT0	Medtr8g005295	258.4712885908074	10.15	1.4242901616676737	0.19790691871245106	7.196767909549927	4.693792010395383e-12	DUF247 domain protein
ZT0	Medtr5g067680	10.039977038317414	0.31	1.4236449794143016	0.6493604981888638	2.192380016008058	0.04756670978195333	WRKY family transcription factor
ZT0	Medtr4g063975	72.1801846224537	4.05	1.4231783953497505	0.45274922068215	3.1434143458170296	0.0036421498586725405	expansin A10
ZT0	Medtr2g026635	1195.5960876987456	20.17	1.422749506150774	0.13747314727019774	10.349290275244947	8.766075385125412e-24	pentatricopeptide (PPR) repeat protein
ZT0	Medtr4g105460	726.7306345781924	35.58	1.4224784749630424	0.1315351919568325	10.814432653353137	7.139592324430125e-26	Sec14p-like phosphatidylinositol transfer family protein
ZT0	Medtr0229s0020	16.414906181140925	0.73	1.4223196098789426	0.6151316046046275	2.312220018012456	0.03588252859009637	DNA topoisomerase
ZT0	Medtr1g033010	208.09148007963205	2.44	1.4201385645243552	0.1678931421060803	8.458585899995045	3.0793976781807707e-16	receptor-like kinase
ZT0	Medtr4g088915	63.005270300476525	8.89	1.41993840058457	0.21687350580076023	6.54731150926778	3.647549489386185e-10	rubber elongation factor protein
ZT0	Medtr2g036560	685.8011013730728	8.74	1.4190854348599495	0.1391122123363079	10.201012628778185	3.8765200771719054e-23	PPR containing plant-like protein
ZT0	Medtr1g100647	1713.8448864908883	162.39	1.4189732911813342	0.1331039941627263	10.660636445263755	3.633453951157821e-25	carboxy-terminal region remorin
ZT0	Medtr2g015720	655.0964571271537	15.91	1.4186089787343297	0.11269654665501704	12.58786556323619	1.0492114435867305e-34	trichome birefringence-like protein
ZT0	Medtr6g008170	123.59068364633592	2.97	1.4181098333279742	0.19979206393349525	7.097928743556202	9.327480451883217e-12	armadillo/beta-catenin repeat protein
ZT0	Medtr5g094340	133.79333631929296	2.92	1.4176656591829842	0.18676394818970388	7.590681568495235	2.753788387209023e-13	calcium-dependent lipid-binding (CaLB domain) family protein
ZT0	Medtr3g462110	4.1002409706402565	0.62	1.414159674710108	0.8326428574713691	1.6983988537471297	0.1317331018558458	hypothetical protein
ZT0	Medtr7g005950	432.4925352657601	3.3	1.413033717371948	0.11054321807996811	12.782635985409296	9.319097181620468e-36	glucan synthase-like protein
ZT0	Medtr8g465890	77.21552452426297	2.47	1.4125837152639287	0.21501576105588494	6.569675210445539	3.161731995056397e-10	PPR containing plant protein
ZT0	Medtr0003s0560	354.70237125212674	16.68	1.4109319872286141	0.1492153813071252	9.45567390485394	5.0761321974953867e-20	serine carboxypeptidase-like protein
ZT0	Medtr7g079400	8.23763550951697	0.38	1.4107750195186588	0.5921117770939027	2.382616043279485	0.030259178085218073	F-box protein interaction domain protein
ZT0	Medtr5g017070	81.74808067445898	0.56	1.4102503431967959	0.300471514397939	4.693457701048779	9.290916302716319e-6	DNA polymerase
ZT0	Medtr6g027460	286.08915228248605	14.74	1.4081939081565662	0.187118754359747	7.525669529892387	4.432702334902777e-13	Dof zinc finger DOF5.2-like protein
ZT0	Medtr7g057760	104.82690426044397	15.38	1.4070434361479525	0.19502435562079362	7.214706243582289	4.142374514161696e-12	hypothetical protein
ZT0	Medtr8g063150	683.1704059817223	49.07	1.4060291110560712	0.17671271565899715	7.956581425466225	1.726131730285871e-14	hypothetical protein
ZT0	Medtr4g019800	392.88043015864645	40.37	1.4059148037418616	0.1304067676725366	10.780995716972628	1.0188670856390336e-25	adenine nucleotide alpha hydrolase superfamily protein
ZT0	Medtr7g406840	829.8615200952371	14.9	1.4015922386145019	0.1306848113229534	10.724981919672611	1.845461204062886e-25	heparan-alpha-glucosaminide N-acetyltransferase-like protein
ZT0	Medtr7g011100	5.19978131197346	0.14	1.4010196651876854	0.7222866237707034	1.9397004168146579	0.08213266793534169	pentatricopeptide (PPR) repeat protein
ZT0	Medtr1g064710	257.19323516767247	4.19	1.4005856329621396	0.19429378569544384	7.2085971661366575	4.323207733365711e-12	RING/U-box protein
ZT0	Medtr1g112510	24062.469813952306	879.01	1.3987311498827657	0.06188450560169469	22.60228366184866	3.091673655854172e-110	D-glycerate dehydrogenase/hydroxypyruvate reductase
ZT0	Medtr2g070060	1594.2565111926087	186.2	1.398677892719301	0.10876429504216893	12.859715517643181	3.515451033774558e-36	glutathione S-transferase, amino-terminal domain protein
ZT0	Medtr8g033400	41.50799622651543	1.38	1.3982776794789007	0.3505733775640821	3.9885449636668615	1.863941688375271e-4	D-isomer specific 2-hydroxyacid dehydrogenase domain protein
ZT0	Medtr1g015930	1476.8513353937976	39.59	1.396273606785054	0.0836517234797936	16.691510332388184	1.883662327711495e-60	C2H2 type zinc finger protein
ZT0	Medtr4g131350	90.37208207952725	2.49	1.3947488893402924	0.1750885499704463	7.965962877502362	1.605564554151893e-14	XH/XS domain protein
ZT0	Medtr4g028060	14.816157945584104	0.59	1.3945746381884012	0.6630801274129442	2.103176645678459	0.05799965895791382	cyclin p4
ZT0	Medtr2g022250	155.2473946510216	3.39	1.3925934527248311	0.20227762104802438	6.884565111600774	3.998950965244159e-11	heavy metal transport/detoxification domain protein
ZT0	Medtr5g072900	811.4229952804402	20.76	1.390030376962594	0.08531504618631806	16.29291009146183	1.2407495375534346e-57	calcineurin-like metallo-phosphoesterase superfamily protein
ZT0	Medtr1g102350	96.05676393723881	1.24	1.3890687661250052	0.22240256784860446	6.24574068349149	2.403002521021716e-9	subtilisin-like serine protease
ZT0	Medtr4g130660	684.6791439662383	223.09	1.3881890413253855	0.09643192875544473	14.395533297336497	3.734069285138209e-45	low temperature and salt responsive family protein
ZT0	Medtr4g115920	94.12728750345704	2.95	1.3870191836801127	0.229507508056221	6.043458862968192	8.058231230464548e-9	monogalactosyldiacylglycerol synthase
ZT0	Medtr4g079700	137.72552664316197	11.69	1.386111473734392	0.20899790363961163	6.632178838140655	2.1129446775240954e-10	Pmr5/Cas1p GDSL/SGNH-like acyl-esterase family protein
ZT0	Medtr4g121880	321.25084038399154	8.38	1.3852229787790722	0.1646245826856248	8.414435779766634	4.412873457280907e-16	dihydrolipoamide dehydrogenase
ZT0	Medtr1g013130	10.032640165832708	0.33	1.383629728608754	0.7540705951689137	1.8348808950690054	0.10150231330709118	zinc finger-like protein
ZT0	Medtr7g084560	1443.6937821273561	9.33	1.382922712941002	0.1012170718200345	13.662939344855378	9.928419010059164e-41	DEAD-box-like helicase superfamily protein
ZT0	Medtr5g019790	1766.91455485162	41.59	1.382836138156254	0.07609522936411517	18.17244194822506	1.7397040367630726e-71	protein phosphatase 2C family protein
ZT0	Medtr4g117020	244.54707770329054	3.21	1.3826064951485777	0.14258964391369836	9.696401906897202	5.377607467196675e-21	cysteine-rich RLK (receptor-like kinase) protein
ZT0	Medtr4g028930	314.2535611410965	9.05	1.3821019732743118	0.13532679114208856	10.213069870423155	3.452327584754646e-23	ovate transcriptional repressor
ZT0	Medtr7g117270	553.6236236793528	10.86	1.376505952394019	0.15412224547401857	8.931260689593742	5.576940642982828e-18	plant organelle RNA recognition domain protein
ZT0	Medtr6g038640	768.3612108819364	21.63	1.375890086880847	0.12713673188482857	10.82212879380325	6.598299977609466e-26	oxidoreductase family, NAD-binding rossmann fold protein
ZT0	Medtr4g073690	374.75866657911575	6.47	1.3728166701879052	0.26665808070050606	5.148228272631154	1.050361745239431e-6	nodulin-like/MFS transporter
ZT0	Medtr8g006870	40.841815359369136	0.87	1.3697300776470478	0.28281545774717376	4.843193821716542	4.641221986774827e-6	Serine/Threonine kinase family protein
ZT0	Medtr4g124320	296.25046762821694	4.12	1.3681148457493055	0.19692991809452604	6.94721685250797	2.61453367587349e-11	pectinacetylesterase family protein
ZT0	Medtr7g086640	1201.301099333222	11.96	1.3680632428587265	0.13986051595476792	9.781625882898714	2.38974578040547e-21	polyribonucleotide nucleotidyltransferase
ZT0	Medtr5g056160	16.038600477797463	0.21	1.3674774578173137	0.697868171849259	1.9595068423792392	0.07882425847655532	S1/P1 nuclease family protein
ZT0	Medtr1g111590	39.65428398262825	1.45	1.3669792171244894	0.26023576623827976	5.2528491255611724	6.207126566638536e-7	pectate lyase family protein
ZT0	Medtr2g015530	4.41062417279065	0.09	1.3669642513032596	0.9308339005393493	1.4685372444119247	0.19697807396922754	pentatricopeptide (PPR) repeat protein
ZT0	Medtr2g101380	3775.934995028454	307.71	1.3664814065678874	0.11123618248863747	12.284504699785707	4.261416729189131e-33	2Fe-2S iron-sulfur cluster-binding domain protein
ZT0	Medtr6g082420	110.09115591399198	2.91	1.3662239917620744	0.20554915103516203	6.646702187197858	1.9263320502730184e-10	alpha/beta fold hydrolase
ZT0	Medtr3g077550	3528.6782315965074	39	1.3656422413847817	0.07641786558816924	17.870719508766364	3.67266860843475e-69	transmembrane protein, putative
ZT0	Medtr2g018990	72.06467538696367	1.7	1.3651462702174528	0.25449453160997465	5.364147754300696	3.5073636693282836e-7	Serine/Threonine kinase family protein
ZT0	Medtr8g010320	18.630821670546435	7.79	1.3647271833063344	0.6443727710552395	2.117915660947973	0.056108196897501184	Defensin-like protein
ZT0	Medtr7g013810	29.116150717917687	0.72	1.364627644576568	0.3271980390371944	4.170647380993146	8.97716354310984e-5	glycoside hydrolase family 81 protein
ZT0	Medtr2g031740	279.735024968036	9.9	1.3617680704473578	0.13489491758514244	10.095028744043248	1.1171985203502278e-22	nucleic acid-binding protein, putative
ZT0	Medtr8g023440	7.270463923211032	0.66	1.3609599641391557	0.6093598467543067	2.233425735857344	0.043279681396837556	RNA polymerase Rpb2 domain 3 protein
ZT0	Medtr1g015530	1630.2363032469054	17.11	1.3585458752979676	0.06071878342213398	22.374392218186856	4.86735391941756e-108	LRR receptor-like kinase family protein
ZT0	Medtr4g092690	17369.392458936687	599.34	1.3546147510158368	0.061234548272039384	22.121739920377177	1.2117452655655358e-105	glyoxysomal malate dehydrogenase
ZT0	Medtr8g091660	497.4683172816594	13.97	1.3542529255780573	0.10041928134244134	13.485985036677354	1.0565700575082268e-39	alanine-glyoxylate aminotransferase-like protein
ZT0	Medtr4g120825	83.99218215445232	3.11	1.3533462089981063	0.3701248506353694	3.656458642738807	6.504854904213962e-4	plant invertase/pectin methylesterase inhibitor
ZT0	Medtr6g033660	4.24673876170274	0.02	1.352654780288182	1.5253981697706418	0.8867552138806923	0.45243992386589	UDP-glucosyl transferase 88A1
ZT0	Medtr6g088270	13027.88470483818	109.33	1.351668970401639	0.11672282790815079	11.58015955084011	1.624367985891962e-29	elongation factor Ts protein
ZT0	Medtr2g103300	161.40268327495966	6.86	1.3500370812688367	0.197246410177915	6.844419019089432	5.238019734954823e-11	aspartate racemase
ZT0	Medtr5g091340	6919.017896415533	65.98	1.3484279160822736	0.08177342738289023	16.48980554243481	5.209950943123789e-59	sucrose-phosphate synthase family protein
ZT0	Medtr8g011480	57.79270871455543	1.82	1.3483109800754787	0.32351770480478104	4.167657472993895	9.088166038055399e-5	hypothetical protein
ZT0	Medtr8g099410	2710.6589505270813	27.81	1.3473257827587812	0.20896993319984725	6.447462379529373	6.871965297422659e-10	endo-1,4-beta-glucanase
ZT0	Medtr3g114920	149.88777477919524	8.03	1.3471716728288758	0.2132025582802672	6.318740655344014	1.5341765746759114e-9	high mobility group B-like protein
ZT0	Medtr3g080390	17.48206165129802	0.31	1.3447520359332075	0.49960799928408584	2.6916143013325895	0.013627593126957825	nucleobase-ascorbate transporter-like protein
ZT0	Medtr4g082300	26.23279191708648	0.84	1.3437935860786596	0.42422386850867433	3.167652001295119	0.003375749410708395	GCK domain protein
ZT0	Medtr7g017790	17.608582239391083	1.83	1.3435369480581132	0.49990904570509087	2.6875627868728342	0.01378292563414813	hypothetical protein
ZT0	Medtr5g097420	150.18920760930826	17.61	1.342528611946197	0.17529771296175634	7.658563190947554	1.6602937634560674e-13	carbohydrate-binding X8 domain protein
ZT0	Medtr7g069500	42.0765500436495	0.83	1.342341900250291	0.28032297707968845	4.788554667313976	5.985630657348665e-6	pyruvate decarboxylase
ZT0	Medtr4g087150	8.760482263221816	0.16	1.34110174994398	0.6683705449485462	2.0065243151120957	0.07147423863971727	PPR containing plant-like protein
ZT0	Medtr2g450220	210.03840587754706	10.09	1.3404931790808485	0.1714718527773023	7.817569807342102	5.002901463324179e-14	calcineurin-like metallo-phosphoesterase superfamily protein
ZT0	Medtr4g012810	818.4190259161614	70.37	1.33770642223552	0.12551463679587727	10.657772323486173	3.7439950139504287e-25	hypothetical protein
ZT0	Medtr8g036185	338.6723095461182	6.45	1.336172150826014	0.12002589878107593	11.132365301118526	2.3530685916058852e-27	cytochrome P450 family protein
ZT0	Medtr2g025020	751.8874492527698	15.42	1.3327818665690714	0.12557109572319383	10.613763134686875	5.911362479337226e-25	pyrophosphate-fructose-6-phosphate 1-phosphotransferase
ZT0	Medtr1g015520	19.73868614989954	8.11	1.3321259018320342	0.39579020811771753	3.3657373894298765	0.001776439285843011	hypothetical protein
ZT0	Medtr8g104765	115.34758861308283	3.01	1.3318042488753026	0.30651387339430136	4.345004792530423	4.3424583072344804e-5	plant invertase/pectin methylesterase inhibitor
ZT0	Medtr7g090230	51.59393488488196	1.07	1.3308802532304855	0.3830992571814626	3.47398286026978	0.0012324664994875754	glutaredoxin family protein
ZT0	Medtr8g086560	102.49044477080984	1.58	1.330832927442801	0.2421682880208144	5.495488027434937	1.7533412060222606e-7	PPR containing plant protein
ZT0	Medtr5g042560	21.34402413194331	0.18	1.329821646984531	0.4785855880407568	2.778649587900424	0.010695192980219552	ERD (early-responsive to dehydration stress) family protein
ZT0	Medtr7g073530	781.8675244271179	19.62	1.3285386129728156	0.08954240803099608	14.836976603453946	6.448370376681873e-48	Serine/Threonine kinase domain protein
ZT0	Medtr6g069400	168.17399293906396	1.34	1.3270818648262215	0.33660774787627246	3.9425172866609697	2.2361075606102017e-4	zinc finger (Ran-binding) family protein
ZT0	Medtr7g113780	100.53632618661628	2.5	1.326703841851761	0.31474018758934535	4.215234959390591	7.477690212175911e-5	GNS1/SUR4 membrane family protein
ZT0	Medtr4g052840	657.6188032009509	47.71	1.325887542125777	0.15001171402194713	8.838560046929375	1.2462933790290264e-17	late embryogenesis abundant hydroxyproline-rich glycoprotein
ZT0	Medtr7g032900	791.2299609769129	29.45	1.3215168889106628	0.08654380137642324	15.269919600165355	1.0656974348574554e-50	methyltransferase type 11
ZT0	Medtr6g048300	221.42707124928532	5.85	1.318856825262788	0.17236380670974696	7.651587943190908	1.7480364595302507e-13	septum site determining protein MinD, putative
ZT0	Medtr3g105900	349.99146352939397	2.77	1.318589151519549	0.11835276685085648	11.141177233154028	2.1354879637202475e-27	proton gradient regulation protein
ZT0	Medtr5g025370	174.14252069725066	7.14	1.318525694994623	0.1645877923341752	8.011078320544692	1.1263384936672489e-14	nodulin MtN21/EamA-like transporter family protein
ZT0	Medtr3g047890	70.18075661676232	1.51	1.314659534203634	0.22283889743448107	5.899596297321338	1.8536465219462373e-8	receptor-like kinase plant
ZT0	Medtr8g006755	401.04461821042577	6.64	1.3142887462389643	0.14290594320693153	9.19687954710071	5.315715047687851e-19	FKBP-type peptidyl-prolyl cis-trans isomerase
ZT0	Medtr7g029350	222.32123731059417	2.35	1.3128694932086846	0.1695718439013016	7.742261114839522	8.862416707709208e-14	methyltransferase small domain protein
ZT0	Medtr5g075490	45.37231083045323	0.87	1.3114032543833398	0.2936557314415712	4.465784638173392	2.574542591008985e-5	kinase interacting (KIP1-like) family protein
ZT0	Medtr7g095920	365.70205874561344	17.61	1.3110602945170757	0.17312486981023928	7.572917143297309	3.138002016306897e-13	beta-carotene isomerase D27
ZT0	Medtr5g027790	162.72057092919997	5.79	1.3110289931873806	0.16019726270097437	8.183841415783483	2.8824342264479118e-15	secretory carrier-associated membrane protein
ZT0	Medtr3g467550	412.82492438068823	6.16	1.3106085454055705	0.1275905921405263	10.271984191139161	1.9231845226275945e-23	DEAD-box ATP-dependent RNA helicase
ZT0	Medtr4g011600	180.37822386235854	1.81	1.31051528731536	0.26861888449153914	4.878716140140319	3.916633307863639e-6	sulfate transporter-like protein
ZT0	Medtr6g047550	40.231005077336185	2.41	1.3102354355206987	0.3738764752988854	3.504460756653027	0.0011102126610425297	helix loop helix DNA-binding domain protein
ZT0	Medtr8g038880	328.9287780477137	7.98	1.3096056176809159	0.11608110825513297	11.281815252853658	4.579629594879921e-28	peptide/nitrate transporter plant
ZT0	Medtr1g097610	526.2178914908127	10.4	1.3080448055370586	0.11981506285984694	10.917198341473453	2.4115740686970265e-26	30S ribosomal protein S1
ZT0	Medtr8g005720	1405.0143738633892	24.27	1.3077850950139578	0.08452098133073518	15.472904767829467	4.900122920912683e-52	Serine/Threonine kinase domain protein
ZT0	Medtr8g018690	2440.1493298865644	25.44	1.3072034372432262	0.5284838037289765	2.4734976323202558	0.024135324615986376	seed linoleate 9S-lipoxygenase
ZT0	Medtr0122s0020	182.91924528552875	8.62	1.3068462464026762	0.15500641083774175	8.430917401027124	3.863846487638135e-16	expansin-like protein B1
ZT0	Medtr2g029520	78.9191582371709	5.68	1.305140841984574	0.20526031010017667	6.358466677496511	1.1979905867654943e-9	glycolipid transfer protein
ZT0	Medtr6g015795	1243.7579776507844	20.69	1.3043067083339093	0.10500446144091352	12.421440864851714	8.095805601757109e-34	carbohydrate-binding protein of the ER protein
ZT0	Medtr3g099030	173.02647494209862	5.71	1.304076240368071	0.2392378322038743	5.450961615706165	2.2239199911832745e-7	heavy-metal-associated domain protein
ZT0	Medtr4g101750	17069.376057804937	252.55	1.2994569501801887	0.07581540658427352	17.139747826001063	1.0946485056715606e-63	translation elongation factor EF protein
ZT0	Medtr3g101560	179.9708704201229	14.48	1.2992511124027009	0.14609666288304804	8.893092331908809	7.793511072748573e-18	hypothetical protein
ZT0	Medtr3g046760	37.36579317023049	1.21	1.2962327630418953	0.41090205052627327	3.154602809554521	0.0035166256888182514	eukaryotic cytochrome b561 protein
ZT0	Medtr0054s0080	47.14196357314795	3.25	1.295412216627788	0.3359450329864641	3.8560243177638607	3.1090943301060025e-4	plant/F12B17-70 protein
ZT0	Medtr4g109540	396.9007217510107	6.81	1.2946044142297723	0.1738753738724606	7.445588097940644	7.924266238003244e-13	RNA-binding (RRM/RBD/RNP motif) family protein
ZT0	Medtr3g093710	349.5626300269295	6.57	1.2942111393048528	0.1478244097813115	8.7550570384112	2.550941874267673e-17	receptor-like kinase
ZT0	Medtr2g075910	119.20969758584826	2.67	1.2928986438547572	0.25856333066796017	5.000317100320237	2.180379260926263e-6	UNE1-like protein
ZT0	Medtr5g021230	987.0379336660898	16.15	1.2924148489770348	0.10519365463298914	12.286053312684588	4.191995567196271e-33	radical SAM methylthiotransferase, MiaB/RimO family protein
ZT0	Medtr2g101720	61.94412417360451	0.51	1.2922840683337768	0.3204022851126644	4.033317265135502	1.5609423516930787e-4	homeobox leucine zipper protein
ZT0	Medtr6g086560	41.42100149787218	2.93	1.2922178024918696	0.29084924465244827	4.44291269876259	2.8451562754702114e-5	sigma factor sigb regulation protein rsbq protein, putative
ZT0	Medtr4g057450	47.7959329270786	1.8	1.2914930798715012	0.539148381073861	2.3954316199543078	0.02932491400089472	xyloglucan endotransglucosylase/hydrolase family protein
ZT0	Medtr5g095770	773.4306689709603	52.24	1.2910815803402713	0.12958946886111997	9.962858800848343	4.105228841227809e-22	TIC protein 20-V, putative
ZT0	Medtr2g098880	125.18337525566854	4.75	1.2905812098727758	0.18306255858525966	7.049946312597285	1.2988602457334416e-11	FAR-RED impaired response-like protein
ZT0	Medtr3g082510	74.2303831650361	6.25	1.289546705507773	0.2170669827259468	5.940777769670582	1.4644295587077566e-8	RING-H2 zinc finger protein
ZT0	Medtr2g437160	223.06147849783213	6.94	1.2893943596243265	0.169502027663186	7.60695537038917	2.4372901596685617e-13	mTERF protein
ZT0	Medtr3g115990	371.26623214713914	25.19	1.2864434090671244	0.19792378193064114	6.499690924044366	4.937024914844569e-10	outer envelope pore protein
ZT0	Medtr2g031610	74.58105275717655	2.03	1.2860746981455198	0.2368774289964494	5.429283421363025	2.493466805562184e-7	Sec14p-like phosphatidylinositol transfer family protein
ZT0	Medtr4g113090	1656.143271713834	22.48	1.285774171434996	0.12255548516790896	10.491363725364083	2.0674313161597187e-24	bile acid:sodium symporter
ZT0	Medtr4g020550	26.0341421396731	0.19	1.2855005278903495	0.341158654292999	3.7680431427259546	4.3314895673844905e-4	disease resistance protein (TIR-NBS-LRR class)
ZT0	Medtr2g099710	55.587872937402956	0.93	1.284674713730031	0.2622066752640807	4.899473716434467	3.550715829851311e-6	serine/threonine-protein phosphatase
ZT0	Medtr0190s0020	57.445493067764176	0.96	1.284220234756496	0.35008879416432875	3.6682700393823335	6.232759473238965e-4	HXXXD-type acyl-transferase family protein
ZT0	Medtr3g087150	491.6906390855994	20.83	1.28307793168109	0.12964221222351366	9.897069092503296	7.829297470097977e-22	plant/T5J17-70 protein, putative
ZT0	Medtr4g007550	153.01356933408692	25.43	1.2827815400370783	0.19448648764130094	6.5957360616381875	2.6726771430249226e-10	transmembrane protein, putative
ZT0	Medtr5g040920	40.26278914292202	0.92	1.2825289095495234	0.3298720770037697	3.8879583904122534	2.758238044742037e-4	pentatricopeptide (PPR) repeat protein
ZT0	Medtr5g005645	16.321776905835062	4.26	1.2821335102941844	0.43893690221311277	2.9209973092480674	0.007112291169225184	hypothetical protein
ZT0	Medtr4g068000	540.4460729927955	8.31	1.281007711242918	0.13130230593252573	9.756170709608165	3.0476858545817e-21	plant regulator RWP-RK family protein
ZT0	Medtr3g116060	740.345200792004	10.71	1.2798581349261016	0.08537874973095191	14.99035929852837	6.884993934760822e-49	tonoplast monosaccharide transporter 2
ZT0	Medtr8g088300	7.404145078978185	0.12	1.2797942560879052	0.6464181087097416	1.979824263652499	0.07560511474615701	pentatricopeptide (PPR) repeat protein
ZT0	Medtr5g036660	550.3799754144547	5.44	1.2792658351305233	0.13692626147716946	9.342735435333733	1.427047445858631e-19	DEAD-box ATP-dependent RNA helicase ISE2
ZT0	Medtr3g093540	199.92323995999564	11.23	1.279013210112493	0.19777815829352088	6.466908283240864	6.070596167754785e-10	acetyltransferase (GNAT) domain protein
ZT0	Medtr5g042590	50.74404825694127	0.7	1.2777913945401709	0.24008535260134828	5.322238031996439	4.3530531315372726e-7	eukaryotic translation initiation factor 2c
ZT0	Medtr3g498695	24.922131954290613	0.49	1.2777743484468007	0.3838789773609566	3.328586413434475	0.002008945166936922	BHLH transcriptional factor
ZT0	Medtr3g086340	767.9394220042484	14.33	1.2774951541355533	0.07251051461571006	17.618067681714844	3.041991953824018e-67	OSBP(oxysterol-binding protein)-related protein 1C
ZT0	Medtr3g064650	10.861887787784374	0.37	1.2758701622258826	0.6479417677605819	1.9691123889659845	0.07727141440697276	transmembrane protein, putative
ZT0	Medtr4g070360	273.37597684086893	10.97	1.2754023708884203	0.12429214059760914	10.261327584802686	2.1400767202172963e-23	phenylcoumaran benzylic ether reductase-like protein
ZT0	Medtr7g058760	899.3704070867759	15.31	1.275293800982711	0.11979979361591013	10.645208664310625	4.267612510082697e-25	DUF3685 family protein
ZT0	Medtr1g034050	524.1556501743472	17.23	1.2737521550031965	0.10416978299757218	12.227654876010282	8.409829518406246e-33	embryo defective 1273 protein, putative
ZT0	Medtr3g113840	195.2570065248929	3.79	1.273634615216917	0.14129792031241742	9.013824211997184	2.703887604140364e-18	hypothetical protein
ZT0	Medtr7g105550	17.640764510525237	4.05	1.2731938496505715	0.4287956539130633	2.969232169290379	0.006163480549429115	hypothetical protein
ZT0	Medtr1g087050	13.870883082833092	1.6	1.2722229299513521	0.47864774789677617	2.657952399320003	0.01494284151220594	transmembrane protein, putative
ZT0	Medtr4g046023	305.08755689453494	6.11	1.271373172706	0.20228190062311738	6.285155363824497	1.8855034476051128e-09	embryo defective 1923 protein, putative
ZT0	Medtr7g081220	203.51345359862614	10.8	1.2704675552335876	0.1311472490510133	9.687336672532144	5.8486189664649954e-21	2-dehydro-3-deoxyphosphooctonate aldolase
ZT0	Medtr7g073340	472.1624672974642	13.16	1.2703404133707938	0.13114536106899657	9.68650665960238	5.889258022211805e-21	non-green plastid inner envelope membrane protein
ZT0	Medtr6g077800	284.83739614416083	7.77	1.2686663882700735	0.1479431525023256	8.575364028761863	1.1685854856842257e-16	pentatricopeptide (PPR) repeat protein
ZT0	Medtr2g100220	569.610281520038	21.01	1.2677884119828755	0.09871571346318472	12.84282276352779	4.359331389389886e-36	ribonuclease III domain protein
ZT0	Medtr5g090260	14.660253854826157	3.08	1.2677447441136678	0.6170424638332097	2.054550243168267	0.06454335444723983	hypothetical protein
ZT0	Medtr1g010170	36.79078726897263	10.73	1.2668944798370347	0.3178409598860807	3.9859383771402848	1.8832309498639235e-4	hypothetical protein
ZT0	Medtr8g098615	135.59299322991984	52.97	1.2666596213012715	0.14848999458287562	8.530269159612098	1.7040985594681e-16	ubiquitin-conjugating enzyme
ZT0	Medtr1g067330	201.23974577391837	11.47	1.266173975910461	0.17796300222889866	7.114815776606698	8.294420216927214e-12	flagellin N-methylase
ZT0	Medtr1g083600	708.5901979074752	33	1.2656399364170654	0.08353918060846914	15.150255571081766	6.431612783724748e-50	TPR repeat protein
ZT0	Medtr8g103540	84.70535258258597	1.17	1.2648677002732054	0.2091709543913084	6.047052297265628	7.886512447844608e-9	regulator of Vps4 activity in the MVB pathway protein
ZT0	Medtr7g086420	701.7055549330623	3.18	1.2648097661780182	0.16355408729447232	7.733281308346522	9.483667716581328e-14	receptor-like kinase
ZT0	Medtr7g099265	24.905084056456964	9.64	1.2642199142124428	0.3993416322233101	3.1657603720753476	0.003395426461270001	hypothetical protein
ZT0	Medtr5g096020	169.41753720300764	2.42	1.2633586119447227	0.2570252188265002	4.91530993617217	3.2868619235844615e-6	ribosomal RNA small subunit methyltransferase B
ZT0	Medtr8g099245	342.4542579362109	193.25	1.2615483909248384	0.15964405278440819	7.902257358928995	2.628307925941376e-14	arabinogalactan peptide-like protein
ZT0	Medtr2g042970	129.2714955283136	5.47	1.2613811091722809	0.18359202080567194	6.870566071645481	4.395803365049468e-11	DUF581 family protein
ZT0	Medtr5g090650	172.0562118075057	7.29	1.2602930351598727	0.14034357109439982	8.980055340847477	3.642603721498863e-18	anthocyanidin 3-O-glucosyltransferase
ZT0	Medtr1g069325	196.1611917220001	5.66	1.2592807185545716	0.1451227455343774	8.67734905315905	4.9464519459817166e-17	pfkB family carbohydrate kinase
ZT0	Medtr5g011430	14.642203925415638	5.75	1.2590834389605456	0.5561157758757603	2.2640671126039638	0.04027027342265007	hypothetical protein
ZT0	Medtr6g039440	332.02477314759363	3.3	1.2589426467833031	0.23413396812694937	5.377018366257279	3.2786235551773316e-7	sesquiterpene synthase
ZT0	Medtr2g088390	599.1786598852972	13.32	1.256726386998115	0.12412635562944373	10.124573307781944	8.336509613728085e-23	APO RNA-binding protein
ZT0	Medtr6g008410	542.7009872782835	3.01	1.256139152920112	0.13315785421176246	9.433458960088524	6.206783806890323e-20	group IIA intron splicing facilitator CRS1
ZT0	Medtr7g087410	199.18694409714627	3.02	1.2552699895697352	0.1798450575549342	6.979730255785924	2.0976385786026337e-11	MATE efflux family protein
ZT0	Medtr1g019940	180.01393498826255	5.8	1.2551970442666578	0.14369483112336406	8.73515793472803	3.018767136038344e-17	patatin-like phospholipase
ZT0	Medtr1g109350	442.86668759999816	37.18	1.2548091075576548	0.19445496211086066	6.452954935869808	6.632979629486709e-10	B-box zinc finger protein, putative
ZT0	Medtr1g033000	76.08603117931625	0.77	1.2521315562087916	0.21850638238983483	5.730411819160858	4.829688159987762e-8	receptor kinase TMK1-like protein
ZT0	Medtr4g116320	95.7201382336253	4.84	1.251815604501051	0.21636580398772326	5.785644410667038	3.542015057308871e-8	F-box protein interaction domain protein
ZT0	Medtr7g069950	299.6070578970634	12.32	1.2506159448859022	0.16312216572397328	7.666744365092163	1.5626277859179971e-13	40S ribosomal S4-like protein
ZT0	Medtr5g057670	95.00373744010092	6.42	1.2502074831632282	0.18829781166471019	6.639522106552105	2.0170873560029448e-10	fiber protein Fb34
ZT0	Medtr2g060420	801.5103688214665	14.1	1.2492475008844632	0.12245495012723971	10.201690495863197	3.854890169144011e-23	nitric oxide synthase-associated protein
ZT0	Medtr8g036920	186.47050747599715	9.04	1.24884785661407	0.24513161802026562	5.09460128685164	1.3723300736526024e-6	DNA-damage-repair/toleration DRT100-like protein
ZT0	Medtr3g117890	324.5446533382924	23.31	1.2463893177954342	0.10962431141906781	11.369643299566851	1.727143395782953e-28	heavy metal transport/detoxification superfamily protein
ZT0	Medtr7g087190	270.42507530927264	8.61	1.2462627816546972	0.17548320967106115	7.101891878948336	9.066144428682583e-12	GDSL-like lipase/acylhydrolase
ZT0	Medtr7g013220	116.70246222905124	3.55	1.2452409590572053	0.18442594606042306	6.7519835774584	9.6754955382786e-11	UDP-glucosyltransferase family protein
ZT0	Medtr7g094800	442.04693333984886	5.73	1.2448821634640854	0.10496216108547013	11.860294706112086	6.483057314456058e-31	preprotein translocase subunit SecY
ZT0	Medtr3g101870	23.3911413441099	0.68	1.2446876545637766	0.42994686625262274	2.894980176067707	0.007675057706108652	heat shock transcription factor
ZT0	Medtr4g090440	48.18106918577917	5.04	1.2436137164959624	0.26728864075813125	4.65269946739452	1.1186253203079622e-5	transmembrane protein, putative
ZT0	Medtr5g042410	84.2156784473785	1.57	1.242784820196267	0.2381059235215863	5.219462001681777	7.357111316374538e-7	acylamino-acid-releasing enzyme-like protein, putative
ZT0	Medtr8g010440	39.426101637447275	0.18	1.242054601602146	0.45093105148805024	2.754422427782312	0.011451106831919253	NBS-LRR type disease resistance protein
ZT0	Medtr5g098510	115.8399095844886	8.81	1.2414560392280956	0.24906841350455244	4.984397747430163	2.3551950141542433e-6	SNF1-related kinase regulatory subunit beta-2
ZT0	Medtr8g099160	246.07404322963345	7.39	1.240261520627977	0.1320405084888751	9.393038051898092	9.019941105829804e-20	acyl-coenzyme A:6-aminopenicillanic acid acyl-transferase
ZT0	Medtr5g057335	95.24277331048457	6.42	1.2402281722022597	0.18671452111625617	6.642376633524087	1.979727739696082e-10	fiber protein Fb34
ZT0	Medtr2g008240	1884.6699464116857	40.98	1.2396650821539266	0.1340283778492886	9.249273191591541	3.317502504793903e-19	beta-xylosidase/alpha-L-arabinofuranosidase-like protein
ZT0	Medtr3g064080	55.56742354262975	1.05	1.2396079243485905	0.24817524293911383	4.994889537199769	2.2384192198081516e-6	cysteine-rich RLK (receptor-like kinase) protein
ZT0	Medtr7g009060	1426.7638783339353	12.63	1.2392584447553427	0.09860829971765499	12.567486188319947	1.3498750951084984e-34	phosphoglycerate mutase-like protein
ZT0	Medtr6g034515	451.5347871384379	8.44	1.2373267409825899	0.12449093316528073	9.939091221525745	5.179177423724408e-22	substrate carrier family protein
ZT0	Medtr3g462950	10767.50392267396	211.9	1.2354075451639195	0.08234939041605766	15.002024167054698	5.792068674664278e-49	thiamine biosynthesis protein ThiC
ZT0	Medtr6g078100	348.74293629389115	17.61	1.2350010001929312	0.1612963779537118	7.656718742607766	1.6837823914729642e-13	Kunitz type trypsin inhibitor / miraculin
ZT0	Medtr1g037630	462.640954004845	12.57	1.234025766035513	0.18485137014368896	6.6757728929803335	1.5974705281431927e-10	aspartic proteinase nepenthesin-like protein
ZT0	Medtr4g117050	116.02059551756828	9.67	1.2324120413335404	0.1856229578334572	6.63932983138472	2.019197781724259e-10	aluminum induced protein with YGL and LRDR motif protein
ZT0	Medtr8g070770	615.667561121024	194.04	1.2321473562643983	0.09169167119076693	13.437941966406996	1.997121186667398e-39	Defensin MtDef4.2
ZT0	Medtr2g013470	28.780764291566246	5.25	1.2318486759975489	0.2916368420925604	4.223913093965617	7.217310316293237e-5	hypothetical protein
ZT0	Medtr5g005200	771.6623461248691	70.94	1.2315014571191414	0.09483453912066153	12.985790499305912	7.1642013684019585e-37	SWIB/MDM2 domain protein
ZT0	Medtr6g082400	29.88851906825157	0.28	1.2307221829532569	0.43566160608627097	2.824949836661865	0.00939246056546811	octicosapeptide/phox/Bem1p family protein
ZT0	Medtr4g013325	226.58330378893166	7.59	1.230101661131989	0.21879230519084059	5.622234566517495	8.816162547478735e-8	disease resistance response protein
ZT0	Medtr8g463800	12.5704126995196	0.33	1.229761183872144	0.5245702508115486	2.344321245761866	0.033248286503303214	hypothetical protein
ZT0	Medtr8g080890	102.04427438500262	2.6	1.229342165836911	0.22639912158577682	5.429977630770731	2.48493766666746e-7	amidase C869.01-like protein, putative
ZT0	Medtr7g080290	744.1947767121629	31.24	1.2289228949880582	0.10953585868013502	11.219366057801587	9.062619317363983e-28	biotin carboxyl carrier acetyl-CoA carboxylase
ZT0	Medtr1g069385	52.5219342350683	1.17	1.22735167393205	0.25457113406191617	4.821252332691956	5.135751464812934e-6	3-oxoacyl-(acyl carrier) synthase II
ZT0	Medtr6g015965	139.4421078956103	20.87	1.2256500079596595	0.21287561320729942	5.757587679928912	4.1439988031604767e-8	transmembrane protein, putative
ZT0	Medtr8g069835	190.13562889851536	257.62	1.225057164010751	0.2787147263245604	4.395380108420194	3.4966899323055916e-5	hypothetical protein
ZT0	Medtr5g028020	625.1801890138464	17.65	1.2242159196623925	0.10128681277311291	12.086626937355529	4.5198697977858883e-32	plant/F3C3-6 protein
ZT0	Medtr2g062700	354.8348839778355	12	1.2239956004438268	0.14185465608443196	8.628519036522171	7.483339427614844e-17	S-adenosylmethionine-dependent methyltransferase, putative
ZT0	Medtr1g070145	12.859497898834542	0.15	1.2237712753446046	0.6139917007106602	1.9931397670818016	0.07352909394003151	kinesin light chain, putative
ZT0	Medtr8g105930	36.99302771854699	2.24	1.223069321998238	0.2714914937821358	4.505000524914112	2.164507744671466e-5	PLATZ transcription factor family protein
ZT0	Medtr1g063850	984.7250723308371	17.07	1.2215190525679858	0.16382979843688908	7.456024875954068	7.355330456734405e-13	RNA polymerase sigma factor
ZT0	Medtr5g019920	2133.9509576502037	208	1.2209110951791255	0.10329365291829293	11.819807516584659	1.0381988692425447e-30	plant/T3A5-60 protein
ZT0	Medtr5g030740	10.561925686871966	1.9	1.2208840537002486	0.4850870831208721	2.5168348038573383	0.02161578387212359	hydroxyproline-rich glycoprotein family protein, putative
ZT0	Medtr3g107530	437.182706467905	14.59	1.2204890654709402	0.1192539164385573	10.234373024551925	2.802280997921101e-23	homeobox domain protein
ZT0	Medtr1g008220	363.0475096448126	22.23	1.2199824509364907	0.17899580371568108	6.815704198710291	6.345715012073017e-11	CCT motif protein
ZT0	Medtr5g062430	145.50014786855937	2.21	1.218804461753363	0.19799106990191237	6.155855728024382	4.1217515989487335e-9	glycoside hydrolase family 3 protein
ZT0	Medtr1g079525	973.5337370802666	9.49	1.218311421579923	0.1304050257212983	9.342518931622303	1.4292082666739227e-19	plastid transcriptionally active protein
ZT0	Medtr4g014720	61.13514581890813	1.06	1.2174060312016248	0.2625859126167556	4.636219891119712	1.2050831732161103e-5	NB-ARC domain disease resistance protein
ZT0	Medtr3g075500	1497.7865969228253	48.1	1.2167828284972309	0.11734997448002282	10.368837606388837	7.224867545661799e-24	31 kDa ribonucleoprotein
ZT0	Medtr4g074950	450.81052855952834	14.81	1.216775268825254	0.16984051864058214	7.164222522189793	5.8956930131684435e-12	enoyl-acyl-carrier reductase
ZT0	Medtr8g074780	6.4910570572123545	0.12	1.2164978357950917	0.7504064599619243	1.6211185546787763	0.15151098348334963	PPR containing plant-like protein
ZT0	Medtr4g076050	18.91489422114237	2.44	1.2150436392019393	0.4479094897631269	2.7126990317720323	0.01286012538343486	kinase superfamily protein, putative
ZT0	Medtr3g111840	941.6633796779158	32.84	1.2120794355408044	0.09809414064614101	12.356287822666065	1.793641274829755e-33	leucine carboxyl methyltransferase
ZT0	Medtr1g116870	34.05307636732551	1.16	1.2111089489934552	0.32791181128259483	3.693398369080765	5.696649733528722e-4	carbohydrate-binding X8 domain protein
ZT0	Medtr3g082680	777.1410963251775	24.91	1.211035919884173	0.12269410576540234	9.8703675480527	1.0175304473307698e-21	transmembrane protein, putative
ZT0	Medtr7g063520	84.30505285384464	1.55	1.2105743436341536	0.2811332766456858	4.306051414752472	5.128100951959466e-5	glycoprotein family protein
ZT0	Medtr4g076520	763.5038681039946	10.47	1.2093125017566402	0.07796892197238424	15.510186253248003	2.7890262470196207e-52	isochorismate synthase
ZT0	Medtr2g014430	94.78397625787646	8.2	1.2081966143765714	0.22535107432041068	5.361397180022858	3.557975328653675e-7	transmembrane protein, putative
ZT0	Medtr1g077990	108.54719475854476	3.43	1.2066715837523807	0.19714998071319542	6.1205767273586	5.089364589463899e-9	glucan endo-1,3-beta-glucosidase
ZT0	Medtr4g094205	15.709744893591282	0.18	1.2056892284813163	0.5485217414541624	2.1980700806589093	0.046962295653667434	translocon at the outer membrane ofs-like protein
ZT0	Medtr3g011940	87.12931768530173	0.85	1.2056687612880201	0.23670854785007162	5.093473692600558	1.379572200811433e-6	pentatricopeptide (PPR) repeat protein
ZT0	Medtr1g475250	70.55567023592234	2.12	1.2051793037158451	0.17901087256287765	6.7324363401028915	1.1000236293428627e-10	P-loop nucleoside triphosphate hydrolase superfamily protein
ZT0	Medtr7g107560	982.5064343430927	16.1	1.204592190610902	0.08853345651871959	13.606067558835253	2.1127084009188535e-40	Rac GTPase activating protein
ZT0	Medtr3g079330	145.22258441992764	4.54	1.2045246023768605	0.15416432851820644	7.813251054601837	5.166979536786374e-14	homoserine dehydrogenase
ZT0	Medtr5g084700	555.8463325215364	15.95	1.2042331204641383	0.13702304176823546	8.78854464857824	1.9172439814909326e-17	nuclear ribonuclease Z
ZT0	Medtr5g065490	517.8977098414227	7.8	1.2028980339912918	0.14013913049554766	8.583598526248235	1.0905701327903475e-16	transport inhibitor response protein, putative
ZT0	Medtr4g093650	64.46448939999098	0.66	1.2002614012221697	0.2570695936633943	4.669013492096565	1.037967090512425e-5	RNA-binding KH domain protein
ZT0	Medtr7g053240	6.9083796229023795	0.08	1.1992181309651608	0.6847745565822738	1.7512597678139317	0.11921285293685505	pentatricopeptide (PPR) repeat protein
ZT0	Medtr8g447000	357.0152289088788	13.44	1.1986596764059712	0.17436338149338565	6.874492030033505	4.281589961369249e-11	DNA-3-methyladenine glycosylase I
ZT0	Medtr5g029550	1365.4348570227673	44.01	1.1980718156058372	0.1312012956727718	9.131554756851939	9.533295573165522e-19	inactive shikimate kinase-like protein
ZT0	Medtr1g075320	891.2401543601051	21.22	1.1975660649938327	0.06342649275339624	18.88116484148034	4.347629414088067e-77	N-carbamyl-L-amino acid amidohydrolase
ZT0	Medtr4g014590	206.0194867432469	4.11	1.1973067464731857	0.24583089087838753	4.870448714541302	4.074663476931452e-6	40S ribosomal S4-like protein
ZT0	Medtr3g092710	164.71019818293684	3.71	1.197280911663307	0.18345160914838815	6.526412699355854	4.170667139992979e-10	plastid transcriptionally active 15 protein
ZT0	Medtr3g096750	140.24498847670168	7.31	1.1972610670755712	0.19871356850085084	6.025059466789481	8.986902818287165e-9	PsbP domain protein
ZT0	Medtr7g112615	601.0363538116508	25.02	1.1958931004623803	0.07537794564302916	15.865291767512833	1.1316936400542033e-54	epoxide hydrolase
ZT0	Medtr2g088220	848.5965463346802	32.41	1.1954219442738396	0.09071120821487497	13.178326777900997	5.972917429333238e-38	phenylpropenal double-bond reductase
ZT0	Medtr7g085600	542.6087653601039	22.98	1.1952938791345138	0.08939568868466946	13.370822426915266	4.85995789254534e-39	chaperone DnaJ domain protein
ZT0	Medtr1g017530	20.520062359890197	0.67	1.1946361073830059	0.43452303104117723	2.7493044603884234	0.011612453044656667	hypothetical protein
ZT0	Medtr8g091670	159.71493378641588	3.53	1.1928833551021758	0.15500125534152862	7.695959316418344	1.2560090842275902e-13	PPR containing plant-like protein
ZT0	Medtr4g133870	184.2663472199523	4.62	1.1903519447072222	0.17598982498850918	6.763754352190209	8.956118457053204e-11	outward rectifying potassium channel protein
ZT0	Medtr4g109920	213.02129709800445	8.35	1.1903362324831375	0.15010183858965898	7.930190886849961	2.1203556361950002e-14	isoaspartyl peptidase/L-asparaginase
ZT0	Medtr3g082690	1166.0668091968942	18.22	1.1899923552431642	0.12690010288603476	9.377394723721077	1.0401399996345325e-19	rubisco methyltransferase family protein
ZT0	Medtr7g099260	816.6502394438218	43.02	1.1893222371162655	0.18880020998016953	6.299369249860395	1.7284916096039617e-9	TPR repeat protein
ZT0	Medtr1g017700	87.52352165037536	17.85	1.1892384219991925	0.2373860896594566	5.009722447112299	2.082589965582558e-6	phytosulfokine precursor protein
ZT0	Medtr3g118290	1904.0128462924674	31.36	1.1886606156772233	0.11033937678698451	10.772768981394465	1.113221219169367e-25	RNA polymerase sigma factor
ZT0	Medtr2g025050	1938.7439570861861	43.95	1.1885496115857448	0.16700285304171586	7.116941956008712	8.171757888637255e-12	plastid lipid-associated protein
ZT0	Medtr4g071445	601.7591117554086	10.6	1.1855059119392313	0.14491269201548856	8.180828714523653	2.9543446502588436e-15	MATE family efflux protein
ZT0	Medtr5g077220	59.028179790010014	0.27	1.185333062031509	0.3234964616854756	3.664129913062132	6.328776700497465e-4	PPR containing plant-like protein
ZT0	Medtr7g089910	40.971360909455214	0.29	1.1850973714261361	0.43575890790201066	2.7196170862733795	0.012619732066388048	transmembrane amino acid transporter family protein
ZT0	Medtr8g038390	152.76794657760666	3.56	1.1843445518796245	0.17841717264978466	6.638063670050283	2.0353134744351998e-10	uridine 5-monophosphate synthase-like protein
ZT0	Medtr6g007510	5.590324816615112	0.79	1.1843040318979143	0.8234702193669415	1.4381868391165022	0.20711492521331404	replication factor-A protein 1, amino-terminal domain protein
ZT0	Medtr4g128750	447.5508735106681	33.28	1.1841970092707768	0.15734358508389704	7.526185504412856	4.417845493621071e-13	CAP, cysteine-rich secretory protein, antigen 5
ZT0	Medtr6g065270	37.98184063624266	1.2	1.1837112178247122	0.29549735248714676	4.005826813207066	1.7408529871924767e-4	carboxylesterase-like protein
ZT0	Medtr6g006970	237.66628568504734	7.4	1.1836293843907497	0.13258502240405745	8.927323485933412	5.773624745642826e-18	50S ribosomal protein L3P
ZT0	Medtr8g087740	92.16350817747241	0.91	1.1832890386170032	0.18962297797546518	6.240219678282375	2.4829304583490606e-9	LRR receptor-like Serine/Threonine-kinase RFK1, putative
ZT0	Medtr3g450510	4932.707401291692	124.31	1.1827728972139344	0.07223750379802141	16.37339103689143	3.43780836033272e-58	squalene/phytoene synthase
ZT0	Medtr3g096000	592.190023874022	6.81	1.182622862606898	0.15492346266415916	7.633594306955111	1.996764350058111e-13	ATP-dependent zinc metalloprotease FTSH-like protein
ZT0	Medtr3g097290	890.0589618633524	10.23	1.1821460883141484	0.10682382885873004	11.066314519370824	4.840005786347134e-27	ferrochelatase
ZT0	Medtr1g085620	616.3713989314773	17.96	1.181725221743199	0.15123345286343373	7.8139141794925235	5.1452154631392917e-14	pectinacetylesterase family protein
ZT0	Medtr7g056613	280.2493388729931	5.36	1.1807570468595223	0.15286275105029018	7.724295413675148	1.0138616732635683e-13	PPR containing plant-like protein
ZT0	Medtr1g070390	865.7025513283663	56.07	1.177970774372909	0.09591822115320414	12.280990621077203	4.444587300791292e-33	linker histone H1 and h5 family protein
ZT0	Medtr5g009810	1355.4446514818858	43.21	1.1773608440490904	0.13211558978552976	8.91159662504904	6.629943953572493e-18	GDT1-like protein
ZT0	Medtr1g029840	408.21826195849854	7.26	1.1772246827155939	0.1193006886046809	9.867710710509714	1.043509828224284e-21	NAD-dependent aldehyde dehydrogenase family protein
ZT0	Medtr0236s0050	13.453660540264773	0.1	1.1770214740848852	0.7233758899087827	1.6271228976587913	0.14994892854463152	peptide/nitrate transporter
ZT0	Medtr2g015310	3.966492053024695	0.05	1.175318927795992	0.9630709043631864	1.2203867051441561	0.29011031001559445	glutamate receptor 2.7
ZT0	Medtr4g097010	202.65009043961498	7.99	1.1748109078802909	0.12520168925722935	9.383347100585988	9.851675248014854e-20	adenylylsulfate kinase
ZT0	Medtr2g105190	286.5586795530458	2.42	1.1740761345016744	0.15533877163224433	7.558165435228448	3.494086408667395e-13	multidrug resistance-associated protein ABC domain protein
ZT0	Medtr1g069370	55.21322333698679	8	1.1736590555695834	0.2524084630917008	4.649840346847599	1.1328896645998764e-5	RmlC-like cupins superfamily protein
ZT0	Medtr4g095280	448.6198918576316	45.16	1.173241343011759	0.1700258581872869	6.900370070294896	3.5913316014338455e-11	hypothetical protein
ZT0	Medtr7g099960	516.9449249988314	45.58	1.1731328826754623	0.10520585773299512	11.150832358144818	1.926912333867233e-27	core histone H2A/H2B/H3/H4
ZT0	Medtr2g062410	296.6663368824681	4.2	1.1721453489101457	0.16799522015262805	6.977254161429242	2.1328089923119457e-11	DUF946 family protein
ZT0	Medtr1g050550	24.562426928695622	0.33	1.1715255428696478	0.42806261126901857	2.7368088499871237	0.012030092573128202	MFS transporter
ZT0	Medtr5g089280	388.85790183319716	11.67	1.1714640430035315	0.11145098006117364	10.511025047608678	1.6981557463706735e-24	dihydropyrimidinase
ZT0	Medtr5g026500	355.0592743347149	4.27	1.1708671353744424	0.17400713555667327	6.728845524803762	1.1262102971245908e-10	3-hydroxy-3-methylglutaryl-coenzyme A reductase-like protein
ZT0	Medtr1g041745	467.1967897995658	22.7	1.1692997155099152	0.1893445005783937	6.17551453534714	3.6585564835750637e-9	plastid developmental protein DAG
ZT0	Medtr4g095780	187.99366362898397	2.15	1.1680457461134397	0.15865946998922922	7.361966771934469	1.4524062487637537e-12	formin-like 2 domain protein
ZT0	Medtr8g015510	288.6805581233762	3.85	1.1670402387611678	0.149765074392145	7.792472600824065	6.063028955589967e-14	IAA-amino acid hydrolase ILR1-like protein
ZT0	Medtr7g084300	13665.636390487256	178.97	1.1662514059686595	0.12367766486932641	9.429765731758284	6.418707038816605e-20	chalcone and stilbene synthase family protein
ZT0	Medtr5g079290	41.3178775067614	1.04	1.1660635679016347	0.33212954030537334	3.510869785414175	0.0010863736807076075	R2R3-myb transcription factor
ZT0	Medtr7g076230	114.39313750163326	0.27	1.1654083517476017	0.3302877433374158	3.5284638175539027	0.0010230167081423276	periodic tryptophan protein
ZT0	Medtr5g088730	392.6789975913781	9.43	1.1652168278022719	0.1100858481162751	10.584619619513166	7.98898840441098e-25	tyrosine-specific transporter, putative
ZT0	Medtr1g050340	294.7555324988726	4.62	1.165028439359259	0.1188248952381013	9.804582087152488	1.917303634447857e-21	transcriptional corepressor leunig-like protein
ZT0	Medtr8g089830	449.91926308413036	48.55	1.1645019510528598	0.13676146031982037	8.514839987300812	1.9359314543470208e-16	hypothetical protein
ZT0	Medtr1g075200	70.45016539614085	2.07	1.1644352378865874	0.17629431146664307	6.605064157767292	2.515726662283604e-10	P-loop nucleoside triphosphate hydrolase superfamily protein
ZT0	Medtr2g010200	174.1537934264149	13.88	1.162924106667873	0.15742069543179196	7.387364815522306	1.2105198314581931e-12	hypothetical protein
ZT0	Medtr4g104320	2646.990375275275	138.92	1.1626695858947536	0.17847106559624148	6.5146111052257805	4.4974653957874723e-10	pectate lyase family protein
ZT0	Medtr4g057845	584.2616527269734	59.05	1.1622309691505868	0.13937962423908098	8.338600247314385	8.235219847465878e-16	hypothetical protein
ZT0	Medtr3g070500	103.58598578210396	6.88	1.1619635680262916	0.17075314084167192	6.8049323268595305	6.816509126174073e-11	peptidyl-prolyl cis-trans isomerase
ZT0	Medtr3g025870	423.8302797470696	6.11	1.1605864843338232	0.0968509808563473	11.983218694039298	1.5353690438716631e-31	hypothetical protein
ZT0	Medtr7g061840	2349.3670573392046	43.31	1.16054732426511	0.12143525197830676	9.556922766318554	1.9887526838556027e-20	double-strand telomere-binding protein, putative
ZT0	Medtr2g034910	84.41787787880669	9.81	1.1602175654608065	0.241937422643617	4.795527507829373	5.794865493289912e-6	hypothetical protein
ZT0	Medtr6g018970	299.0691204115827	7.66	1.1597654690758197	0.11813065885035692	9.817650052599495	1.6917813232023753e-21	aminoalcoholphosphotransferase
ZT0	Medtr1g083690	86.6298391115983	2.53	1.1592242678809197	0.19398565221774858	5.975824782029201	1.1954387832002592e-8	catalytic/protein phosphatase type 2C
ZT0	Medtr8g076940	69.90572253741496	1.04	1.158262571981937	0.3207127175135239	3.6115267924574743	7.632850769882178e-4	cytochrome P450 family protein
ZT0	Medtr5g097620	421.6859304223264	5.96	1.1571688364446624	0.12669691764102517	9.133362184258575	9.389345279887955e-19	auxin-responsive family protein
ZT0	Medtr1g109080	2279.7548256317764	71.44	1.15714270546968	0.0908465117420629	12.737337772033689	1.6485698195444865e-35	Sec-independent protein translocase TatC
ZT0	Medtr8g009050	33.35586836195899	0.82	1.1570767610406911	0.3518824831803738	3.288247685940017	0.0022981813379132237	UDP-glucosyltransferase family protein
ZT0	Medtr4g117280	369.3979659960084	17.29	1.1564950988542215	0.12265312254914805	9.428990267987714	6.459266937789023e-20	TVP38/TMEM64 family membrane slr0305-like protein
ZT0	Medtr5g015230	3.362506913835558	0.33	1.1546806204798856	0.893981759669999	1.2916154138381077	0.26062383934570654	hypothetical protein
ZT0	Medtr7g117980	534.9813108054973	12.44	1.154169079605991	0.14157821754634986	8.152165634011737	3.714921341928086e-15	hypothetical protein
ZT0	Medtr3g049970	74.04690854664139	1.46	1.1537473245712344	0.2486737201802573	4.639602945316908	1.1869358461523898e-5	limonoid UDP-glucosyltransferase-like protein
ZT0	Medtr1g024005	284.9227114041478	6.95	1.1526127239386317	0.12498501046736589	9.222007660187248	4.227664835221905e-19	ATRAD3-like protein
ZT0	Medtr6g092700	966.7770734851327	45.16	1.1519291504502076	0.11517635521567057	10.001437780290857	2.813593906626887e-22	thioredoxin
ZT0	Medtr8g072430	301.0633430288754	1.85	1.151555691955019	0.22072469411591383	5.2171583998221696	7.440616977529276e-7	kinesin-like calmodulin-binding protein
ZT0	Medtr7g045270	126.86621873072627	19.5	1.151233440344928	0.21675399104959522	5.3112444886032835	4.6103260491381966e-7	hypothetical protein
ZT0	Medtr3g089940	36.46474720274207	0.97	1.149040109291873	0.32558994511634254	3.529101947178646	0.001020728002045249	zinc-binding alcohol dehydrogenase family protein
ZT0	Medtr2g073260	352.3640552015351	2.44	1.1490268428684065	0.1439123132057158	7.98421495196125	1.3911927016202491e-14	trehalose-6-phosphate synthase
ZT0	Medtr4g097590	343.10228363725037	6.63	1.148566540749665	0.11683744013681739	9.830466496053715	1.4972378135703907e-21	serine carboxypeptidase S28 family protein
ZT0	Medtr7g099280	298.4990165213164	10.45	1.148563343146314	0.11276541634796976	10.185421916965174	4.5322346840296295e-23	pfkB family carbohydrate kinase
ZT0	Medtr8g096080	733.298219165446	41.49	1.1478340329638417	0.08168913631507073	14.051244568637692	4.855855412193212e-43	transferring glycosyl group transferase
ZT0	Medtr3g112090	135.0111753915031	1.63	1.1468566736600163	0.3817170881150212	3.004467731123525	0.0055552081587374735	60S ribosome subunit biogenesis NIP7-like protein
ZT0	Medtr4g130280	151.2487392692938	3.8	1.1461043772559356	0.1968634813996407	5.821823169576577	2.8824873031997637e-8	transducin/WD40 repeat protein
ZT0	Medtr8g091980	100.16191704961514	3.85	1.1457744503818452	0.1787588743360985	6.409608779632308	8.707857546510343e-10	Ras-related small GTP-binding family protein
ZT0	Medtr0035s0150	138.46242292029407	2.61	1.1450461224979893	0.2306819008895836	4.963744958240431	2.601134442792373e-6	indole-3-acetic acid-amido synthetase
ZT0	Medtr2g048360	176.7448125449785	2.16	1.1448411050886953	0.16824572792887754	6.804577561533411	6.83171344150291e-11	DUF630 family protein
ZT0	Medtr4g117030	38.57629854051921	0.85	1.1435624783166425	0.3097831364286546	3.691493641326772	5.734317369539203e-4	cysteine-rich RLK (receptor-like kinase) protein
ZT0	Medtr4g011040	659.4654433907784	19.01	1.1426015339013995	0.12933861485728923	8.83418718502694	1.2936887812327107e-17	peptide deformylase 1A
ZT0	Medtr1g041890	369.01084998238827	3.4	1.1403150821630677	0.14048706097704075	8.116869085541087	4.905296099673755e-15	peptide chain release factor, putative
ZT0	Medtr5g083810	192.41547447205994	6.19	1.139559707249067	0.21099696335900278	5.400834633388313	2.8928095469322285e-7	transcription factor bHLH93-like protein
ZT0	Medtr5g084750	241.09573840553128	6.06	1.138611556367414	0.17793238219158855	6.399125006607369	9.292214471147599e-10	GDSL-like lipase/acylhydrolase
ZT0	Medtr3g080870	157.04584279776967	1.08	1.1379190333363498	0.29732373156267805	3.8272055424424405	3.4694028330723077e-4	oligopeptide transporter OPT family protein
ZT0	Medtr7g109510	118.88864918346032	7.92	1.1370236253017392	0.19717928574754423	5.76644560300067	3.9461663340776285e-8	BZIP transcription factor
ZT0	Medtr7g107680	428.2395313890885	31.25	1.1363848942403474	0.13919614244374387	8.163910826046184	3.3806125446457366e-15	plant/F4C21-7 protein, putative
ZT0	Medtr4g107040	1808.2617327911385	37.61	1.1350577440805276	0.05969711178683155	19.013612386033515	3.611657358377461e-78	NAD-dependent aldehyde dehydrogenase family protein
ZT0	Medtr3g053180	40.421323719783445	0.37	1.1347879768648423	0.27257102160329816	4.163274474996909	9.250114413286419e-5	disease resistance protein (CC-NBS-LRR class) family protein
ZT0	Medtr6g047570	137.67195615213762	4.73	1.134676796466781	0.17890139594150525	6.342470333980972	1.3246421989962967e-9	basic helix loop helix (bHLH) DNA-binding family protein
ZT0	Medtr2g014920	56.50209566048203	1.37	1.1318237176289592	0.21335848461156506	5.304798258618719	4.762827956316221e-7	LRR receptor-like kinase family protein, putative
ZT0	Medtr3g069280	423.87314665257935	4.3	1.1314426545158265	0.11267458324153035	10.041684841118558	1.8959689337404012e-22	phosphatidylinositol-specific phospholipase C
ZT0	Medtr2g020970	221.7037480301763	6.8	1.1302909533785999	0.12063015092756361	9.369887583555464	1.1144436482520969e-19	phosphatase 2C family protein
ZT0	Medtr7g059033	21.208842326997086	4.3	1.1301333639698323	0.4417082277328224	2.5585517611263966	0.01943934062022391	hypothetical protein
ZT0	Medtr6g081060	5.973748434256545	0.51	1.129862854826464	0.6876547387388934	1.6430670672008263	0.14565554397947789	nucleotide-diphospho-sugar transferase family protein
ZT0	Medtr8g062790	165.63225779384646	3.58	1.128273675904864	0.15534854146417593	7.262853357172001	2.9474100237424672e-12	IAA-amino acid hydrolase ILR1-like protein
ZT0	Medtr4g061700	107.23166209314651	0.63	1.1279335748212775	0.2671065232761366	4.222785580025733	7.248180976545509e-5	DNA-directed RNA polymerase I protein
ZT0	Medtr7g076670	578.7611993648583	28.89	1.1273924189443507	0.20212743601876415	5.577631820549543	1.1248272414158127e-7	phosphomannomutase A1
ZT0	Medtr1g062160	134.9065171698135	9.28	1.1266591620746464	0.16830524138105762	6.6941418629013025	1.417539123075811e-10	PLATZ transcription factor family protein
ZT0	Medtr2g039750	272.4695439890866	21.07	1.1265323865768764	0.12378187374823867	9.100947921245265	1.2494538103501253e-18	30S ribosomal S16-like protein
ZT0	Medtr3g107950	297.5403397011473	8.02	1.125923317921179	0.12556473167614352	8.966875514257934	4.088456447681491e-18	TIFY-like protein
ZT0	Medtr8g066180	17.847183565920552	0.33	1.1257161894017844	0.6158694132399185	1.827848834836111	0.10292121628442069	translin-associated factor X
ZT0	Medtr1g100593	11.733204774298889	0.11	1.1256823903509454	0.7171679344571904	1.569621752822721	0.16595636398792762	PPR containing plant-like protein
ZT0	Medtr1g073320	17.618404294736916	0.62	1.125561578665014	0.4458569720521499	2.5244902496071364	0.021206236842083833	salt stress response/antifungal domain protein
ZT0	Medtr2g020190	1106.7385653349043	59.1	1.124861630867031	0.10312687119089636	10.907551231577841	2.668049255809129e-26	NAD(P)-binding rossmann-fold protein
ZT0	Medtr5g017560	133.92437500347953	3.19	1.1233519077769714	0.2565962809600195	4.3778962952000144	3.775429391607848e-5	EF hand calcium-binding family protein
ZT0	Medtr4g061200	48.09629881788357	0.98	1.1220927158902116	0.28171635275961493	3.983058508668396	1.9047117406140244e-4	AP2-like ethylene-responsive transcription factor
ZT0	Medtr4g130500	9.24316405866951	0.11	1.1212474875376701	0.6945122169759584	1.6144388250213946	0.15330897205400815	pentatricopeptide (PPR) repeat protein
ZT0	Medtr1g025060	114.27863358629904	1.94	1.1206093439596863	0.18706046194405856	5.990626411982295	1.0969690814255975e-8	uridine 5-monophosphate synthase-like protein
ZT0	Medtr5g041700	2079.538922120179	120.72	1.1176006922105033	0.12010528409434418	9.305175044027324	2.0067879570987035e-19	expansin A10
ZT0	Medtr8g075010	32.568486945391726	0.78	1.117440756530158	0.2975386643575895	3.7556152876561595	4.535474041471649e-4	eukaryotic aspartyl protease family protein
ZT0	Medtr8g464690	272.5041953513314	38.15	1.1169254799456754	0.15441493607829265	7.233273595886885	3.6388333297580455e-12	dynein light chain type 1 family protein
ZT0	Medtr4g117460	21.228862643654416	2.7	1.1166823154192755	0.41909989660889585	2.664477668581636	0.01468008521700918	hypothetical protein
ZT0	Medtr8g062720	171.5094584437341	0.77	1.1151691864292177	0.3029666523627397	3.680831463569905	5.955389333684767e-4	DEAD-box ATP-dependent RNA helicase
ZT0	Medtr8g074360	16.239745881711922	9.72	1.1148793044215755	0.45382237379712154	2.456642441608609	0.025177042529438497	phytoene synthase
ZT0	Medtr7g051910	1056.9884220775205	26.2	1.1146750224212776	0.08958628713912213	12.442473709065029	6.303116551716126e-34	auxin-responsive family protein
ZT0	Medtr8g028475	2.6168968047426295	0.27	1.1144687564071245	0.9550059573751729	1.1669757113036592	0.31296536797835406	late embryogenesis abundant protein
ZT0	Medtr3g100220	394.48902093169926	7.93	1.1137787947151965	0.16716656576893688	6.662688735585429	1.7396855121438874e-10	argininosuccinate lyase
ZT0	Medtr0027s0090	38.93268471519662	1.03	1.1133487265904407	0.3015572041533854	3.691998437630235	5.724492303674774e-4	hypothetical protein
ZT0	Medtr5g023090	521.2400435419027	7.79	1.1132311139297189	0.1445340725727119	7.702205397759597	1.1983501205673905e-13	ankyrin domain protein
ZT0	Medtr4g028360	1701.2310489312717	229.68	1.1116705990098374	0.10007985387784889	11.107835952345335	3.0918630451408144e-27	Lipid transfer protein
ZT0	Medtr8g085560	840.1965665975482	56.4	1.1113321405832846	0.08575155479116098	12.959906596327247	9.858073976003897e-37	protease inhibitor/seed storage/LTP family protein
ZT0	Medtr2g020210	276.14515139433746	6.49	1.1106104495562934	0.10770088952498375	10.311989570881504	1.2811607122875871e-23	cyclin-dependent kinase
ZT0	Medtr5g017510	134.17223342245262	3.19	1.1099232946997135	0.2553759806315959	4.346232139587486	4.3215473517870034e-5	EF hand calcium-binding family protein
ZT0	Medtr3g111990	111.66203915731096	3.8	1.1096401169233885	0.23781004566952307	4.666077556981842	1.0522659832733989e-5	phenylcoumaran benzylic ether reductase-like protein
ZT0	Medtr7g104650	607.1641613771254	18.7	1.1088844038194028	0.12157094475664473	9.121294615577085	1.0439314529945585e-18	SOUL heme-binding family protein
ZT0	Medtr8g009870	439.61573367945465	36.12	1.1082377246017183	0.09906616541980949	11.186843862436536	1.294570007991975e-27	calcium-binding EF hand protein
ZT0	Medtr6g464620	110.16945710799061	1.89	1.1066182183708528	0.240401827925221	4.603202179956284	1.4009464069835602e-5	gibberellin 20-oxidase
ZT0	Medtr7g116990	427.01128081253347	32.89	1.1065528803229903	0.1081232655922726	10.234179242197008	2.805916073604286e-23	heavy-metal-associated domain protein
ZT0	Medtr2g036920	35.763419110610265	0.41	1.1061125298616397	0.281627976289695	3.9275662327092227	2.3686888458027667e-4	DUF630 family protein
ZT0	Medtr4g129920	114.49089543955168	1.17	1.1049647884483247	0.20199886234096368	5.470153522860941	2.0085263011236523e-7	cytosolic purine 5-nucleotidase
ZT0	Medtr2g461020	118.62577111460637	6.96	1.1046887194201436	0.17871262277269026	6.181369297149363	3.5315694416755495e-9	zinc finger, C3HC4 type (RING finger) protein
ZT0	Medtr8g104540	3883.8283278519857	41.9	1.1038544710259932	0.0900714266188112	12.255323496735377	6.028429242748853e-33	cytoplasmic phosphoglucomutase
ZT0	Medtr1g089940	13.622960541281078	0.2	1.103224564691701	0.7035308550539215	1.5681253448466665	0.1663784313071566	E3 ubiquitin ligase-like protein
ZT0	Medtr3g061480	509.8616410450733	40.08	1.1030328162828025	0.10138813582252258	10.879308583142647	3.5941165764564436e-26	transmembrane protein, putative
ZT0	Medtr8g007140	4437.843159084014	112.24	1.1026469977523665	0.09110086018050449	12.10358492299211	3.709689716736694e-32	patatin-like phospholipase
ZT0	Medtr4g007090	4.587552284530557	0.38	1.1026239789592176	0.8127728094964558	1.3566201601187124	0.23606923426099038	phospholipid N-methyltransferase
ZT0	Medtr2g102740	368.83409098983253	3.53	1.0997932107452455	0.1346756931985896	8.166233895848722	3.31981222009891e-15	plastidic ATP/ADP-transporter-like protein
ZT0	Medtr3g102670	128.45285871221301	5.5	1.0980235448961817	0.2177305481761043	5.043038535906689	1.7705205638976431e-6	lipase
ZT0	Medtr8g094200	377.3045034347823	11.33	1.0978339747805526	0.10091581676133794	10.8787106918719	3.614620287729451e-26	DUF3727 family protein
ZT0	Medtr6g066250	183.64777208989676	37.07	1.0976836131510652	0.13803866359930056	7.952001160612708	1.788123314759722e-14	small nuclear ribonucleoprotein
ZT0	Medtr3g067445	11.677028274352587	1.2	1.0975967468954264	0.6488018306911263	1.6917288068164484	0.13328723088543767	albumin I
ZT0	Medtr7g084000	3718.329607177186	489.12	1.0972572773726215	0.08338869902894384	13.158345077331981	7.713382791919193e-38	light-regulated protein, putative
ZT0	Medtr4g071465	575.4344270021355	8.97	1.097190142644106	0.11945722407573008	9.184795236398099	5.926814949813065e-19	MATE family efflux protein
ZT0	Medtr4g094295	427.52933288650274	8.41	1.0965147947743359	0.1474816444088962	7.434923845398847	8.560981649894395e-13	amine oxidase
ZT0	Medtr7g094250	50.999325099014854	0.33	1.0965114849876991	0.35646606063321323	3.0760613872745592	0.004475393054048334	2OG-Fe(II) oxygenase family oxidoreductase
ZT0	Medtr7g062630	395.0505515398744	10.52	1.0958152725514987	0.15598988772697975	7.0249122460389355	1.541079968262662e-11	TPR protein
ZT0	Medtr5g096150	1118.7806532909597	39.5	1.09573165822071	0.08185383812897554	13.386442019910984	3.9767199525987655e-39	red chlorophyll catabolite reductase, putative
ZT0	Medtr3g014470	54.50694967038502	0.71	1.0954794097772025	0.23045464368086893	4.753557542950666	7.042504230896903e-6	LRR and NB-ARC domain disease resistance protein
ZT0	Medtr3g092790	173.24570347034563	13.82	1.0951117999342423	0.1368615207252623	8.001604790966665	1.213962272605672e-14	late embryogenesis abundant protein
ZT0	Medtr1g101400	1225.6501659630392	43.35	1.0946485180362644	0.08338318914734104	13.127928173891044	1.1429439179905858e-37	dihydrodipicolinate reductase
ZT0	Medtr2g011400	8.429042999634854	0.71	1.0938166870497539	0.7854896438180385	1.392528463816565	0.22295244444817675	calcium-binding EF-hand protein
ZT0	Medtr5g068860	915.0642165982623	11.9	1.0932236381825702	0.10013829610120399	10.917138405048476	2.4115740686970265e-26	transcription termination factor family protein
ZT0	Medtr6g003980	251.74278144822463	6.89	1.0923729018189545	0.14835138918386992	7.363415387132263	1.4387440785157082e-12	methionyl-tRNA formyltransferase
ZT0	Medtr4g094645	5.073504942649364	0.08	1.0920019220464168	0.867594244986284	1.2586551009956048	0.2740457063117879	pentatricopeptide (PPR) repeat protein
ZT0	Medtr6g477870	77.85206899962546	4.84	1.0903528634808068	0.238043621681098	4.580475022941507	1.550458594432271e-5	RNA recognition motif
ZT0	Medtr7g085490	4942.532169266623	144.5	1.090144163462799	0.09120283948056986	11.952962974305716	2.1865051801589645e-31	NDH-dependent cyclic electron flow protein, putative
ZT0	Medtr4g069960	905.327650891308	15.81	1.0898946330443413	0.09311815052168149	11.704427406884246	3.942396954275774e-30	adenylyl cyclase-associated protein
ZT0	Medtr2g095950	28.56617799082008	0.7	1.0893255539470872	0.43997993818461706	2.47585278192844	0.024000972324859874	Serine/Threonine-kinase rlckvii-like protein, putative
ZT0	Medtr8g107030	419.3568533478204	10.01	1.0885732244513904	0.11708617212912381	9.297197138282913	2.1552499505597168e-19	3-oxo-5-alpha-steroid 4-dehydrogenase
ZT0	Medtr2g073350	38.46662059486638	1.37	1.0883582347348408	0.2836088554631282	3.837532622024694	3.336328814865581e-4	NAD/NADH kinase family protein
ZT0	Medtr5g077000	8256.53618386235	165.74	1.0883164407432229	0.06469693972525668	16.821760741155444	2.2343923078106042e-61	UTP-glucose-1-phosphate uridylyltransferase
ZT0	Medtr6g088460	1449.2626590195246	22.82	1.087048629989483	0.09790540317240318	11.103050442224133	3.255871568576768e-27	hypothetical protein
ZT0	Medtr3g065330	887.0625399988903	56.6	1.0867759193842144	0.08218504232614986	13.22352448358381	3.3254765369674264e-38	nudix hydrolase-like protein
ZT0	Medtr3g075050	633.4789212252796	5.97	1.086415267421191	0.18676918024298067	5.816887272342257	2.965269841502148e-8	nucleic acid-binding, OB-fold-like protein
ZT0	Medtr4g019900	408.9979598889748	3.1	1.0851509279546019	0.11655148480622415	9.310485660124787	1.9149756600386311e-19	DUF3527 domain protein
ZT0	Medtr3g009150	393.7189165091577	25.74	1.0844101557153316	0.11885209690824533	9.124030487678345	1.0189044779895658e-18	bacterial trigger factor protein
ZT0	Medtr7g084990	31.075233280698622	2.29	1.0838604460530863	0.3707430788778226	2.9234812672262174	0.0070613368326513945	hypothetical protein
ZT0	Medtr7g113480	1265.7763947678106	18.42	1.0836710025052947	0.06288263490016578	17.23323146725262	2.247144740920777e-64	Xaa-pro aminopeptidase P
ZT0	Medtr8g077115	364.27328341551595	14.19	1.0826269341268269	0.1285054032759573	8.424758076529695	4.058198423956774e-16	phosphatidic acid phosphatase (PAP2) family protein
ZT0	Medtr4g094595	748.244240076848	6.47	1.0814635600411655	0.09828558913558204	11.00327697633596	9.598290868536411e-27	starch synthase IV
ZT0	Medtr8g102600	650.139844392708	16.9	1.0802933984702998	0.09648173953375812	11.196869000193706	1.1617205032299163e-27	2OG-Fe(II) oxygenase family oxidoreductase
ZT0	Medtr5g080880	53.01085962133042	0.96	1.0798684295425451	0.3092710404691587	3.491657117020733	0.0011596862098623578	glycoprotein family protein
ZT0	Medtr3g085460	31.30574234855254	2.06	1.0798161553062717	0.3721462344418869	2.901590975186643	0.007527235555680867	ELMO/CED-12 family protein
ZT0	Medtr6g078330	18.578365557024206	0.34	1.0793624407903615	0.4529359181742009	2.383035651359481	0.03023589496077396	glycoside hydrolase family 1 protein
ZT0	Medtr4g081560	100.65201896315979	8.56	1.0790882319261086	0.18217823095854016	5.923255628559078	1.618572748899684e-8	DUF538 family protein
ZT0	Medtr8g087940	425.05836182536876	3.66	1.077749467916259	0.11187581513526666	9.633444606532475	9.693913977494747e-21	5'-3' exonuclease family protein
ZT0	Medtr0007s0090	219.68491953162072	3.35	1.0768944485611662	0.21502936941665943	5.008127268766169	2.0990776779874843e-6	disease resistance protein (NBS-LRR class) family protein
ZT0	Medtr3g068155	47.32820435973677	3.04	1.0768578747290394	0.25758598755458256	4.180576299791357	8.622558271174639e-5	NAD(P)-binding rossmann-fold protein
ZT0	Medtr4g071010	1534.2788409063282	42.9	1.075349580951967	0.07653875181624369	14.04974023529539	4.948988640344141e-43	transmembrane protein, putative
ZT0	Medtr7g096280	788.4584653399484	38.3	1.0752909312917098	0.09819476516354901	10.950593236826332	1.6871649389981296e-26	linker histone H1 and h5 family protein
ZT0	Medtr4g056040	14.974225614674191	0.32	1.0744161416992197	0.4678981867017689	2.296260537517398	0.03727188924034523	F-box/RNI/FBD-like domain protein
ZT0	Medtr1g033230	38.601990798539575	1.96	1.0736721437449268	0.2963811237811468	3.622606359161206	7.338924049176989e-4	OB-fold nucleic acid-binding domain protein
ZT0	Medtr3g077640	1206.979719927753	24.69	1.0727998761228927	0.09209559173586357	11.64876467920154	7.425960302213951e-30	plastid phosphate translocator
ZT0	Medtr5g090150	95.88418484301032	1.87	1.0721558910793099	0.19781431111982642	5.420011752485639	2.6194325102431606e-7	PPR superfamily protein
ZT0	Medtr1g017390	4685.146462700605	69.62	1.0713145165182487	0.16360986111667367	6.547982555613023	3.6343722557456563e-10	TCP-1/cpn60 chaperonin family protein
ZT0	Medtr5g070360	60.92784252959293	2.43	1.070616154295473	0.314547014207918	3.403676099076838	0.0015655140495047291	Lipid transfer protein
ZT0	Medtr8g030850	41.23898587484337	0.54	1.0704355040941418	0.425291196617355	2.516947241344474	0.021611650905073068	RHO guanyl-nucleotide exchange factor
ZT0	Medtr7g092970	55.26046459024259	5.96	1.0701080395452554	0.2668724105465454	4.009811420197806	1.7142131790880166e-4	hypothetical protein
ZT0	Medtr5g092080	239.7321904819608	8.73	1.0693092947554743	0.19994834314742224	5.347927759356679	3.815848497581469e-7	lipocalin-like domain protein
ZT0	Medtr8g098320	52.2715261416452	2.71	1.0688670810833354	0.2971928558276897	3.5965436588524757	8.052810470468244e-4	DNA-damage-repair/toleration protein DRT102
ZT0	Medtr2g014770	177.60596165168246	3.08	1.06655767406666	0.13334435920629803	7.998521125416193	1.2443175029517805e-14	auxin response factor 3
ZT0	Medtr4g133740	682.1190374029004	5.99	1.0662224873105828	0.1317677845702938	8.091678028796089	5.978652110534379e-15	pentatricopeptide (PPR) repeat protein
ZT0	Medtr6g033025	557.7045118723436	16.13	1.0658776960296716	0.09484074256839639	11.238605552471203	7.339252572851561e-28	TatD-related deoxyribonuclease
ZT0	Medtr3g114680	49.676506994219174	4.1	1.0657373086496003	0.27745695337377996	3.8410906473620705	3.2923568439918694e-4	hypothetical protein
ZT0	Medtr5g071900	2934.722352135971	38.74	1.0656600201752073	0.09040913297785559	11.787083727882065	1.5210854791176078e-30	fructose-6-phosphate-2-kinase/fructose-2, 6-bisphosphatase
ZT0	Medtr4g022760	379.0544817692213	10.46	1.065224435345361	0.10068926419826885	10.579324854810842	8.433378025717555e-25	HXXXD-type acyl-transferase family protein
ZT0	Medtr5g030580	159.36622624602225	3.28	1.0651341663501699	0.14259774854961713	7.469501988522313	6.663039682456502e-13	sphingolipid transporter spinster-like protein, putative
ZT0	Medtr4g024940	1075.9498884075563	67.05	1.0648668308433735	0.08002649136519913	13.306429067143245	1.1312299036838703e-38	arginase family protein
ZT0	Medtr1g037590	20.35954029787218	0.27	1.0648376980802257	0.4128314820066023	2.5793519740899895	0.01842143852235417	pentatricopeptide (PPR) repeat protein
ZT0	Medtr8g042040	7.807171724109944	0.13	1.0641293550192361	0.6667600575236783	1.5959704589554635	0.15845794764882518	cytochrome P450 family 72 protein
ZT0	Medtr1g028130	115.03760119425264	1.17	1.0626160625598011	0.22520693068897815	4.718398582623224	8.284824749930814e-6	receptor-like kinase
ZT0	Medtr3g061530	209.83581894570764	14.03	1.061186254111796	0.18499673763117958	5.736243069472066	4.671915769938467e-8	transmembrane protein, putative
ZT0	Medtr3g096290	2603.3654174979188	225.74	1.0607951207948594	0.0946708984128852	11.205081377473013	1.0610007264126102e-27	cyanobacterial and plant NDH-1 subunit O
ZT0	Medtr8g069840	588.0028949321814	3.03	1.0604324606451676	0.13532606063836125	7.83612894399561	4.3562534871724714e-14	phylloquinone biosynthesis protein
ZT0	Medtr4g058740	469.3041510216714	25.98	1.0592400131536008	0.10586756569090955	10.005330775680184	2.708651618538077e-22	lysine decarboxylase family protein
ZT0	Medtr8g045735	452.9957102965707	23.72	1.0590158963308922	0.37356355668986024	2.8349015244281657	0.00912958691892	polyketide cyclase/dehydrase and lipid transporter
ZT0	Medtr3g084500	1783.2907382231117	12.67	1.058970335192572	0.12309538984547048	8.602843181389371	9.281107277348345e-17	aspartokinase-homoserine dehydrogenase
ZT0	Medtr1g059660	4488.840128741403	295.89	1.0589592846935416	0.05332836529514426	19.85733631310022	3.0546069307253274e-85	hypothetical protein
ZT0	Medtr4g086255	158.395427237264	5.58	1.0584688042360468	0.16698925069079257	6.3385445461754415	1.357160933092477e-9	protein disulfide-isomerase SCO2-like protein, putative
ZT0	Medtr1g115235	482.6335546284632	13.59	1.0583008132191936	0.13725835896273578	7.7102831566455725	1.1259453919801572e-13	thioredoxin superfamily protein, putative
ZT0	Medtr4g022560	46.513276277851986	0.52	1.0572179845673417	0.2534291375952188	4.1716512734062485	8.939547249766792e-5	NBS-LRR type disease resistance protein
ZT0	Medtr4g107500	2903.918855394398	32.28	1.0566453191821863	0.0932280268312766	11.333987804917241	2.56545160989877e-28	plasma membrane H+-ATPase
ZT0	Medtr3g099190	2541.315178673556	25.93	1.0556329458923772	0.05799045801870104	18.20356282669731	9.931793744686254e-72	acetolactate synthase 1 catalytic subunit
ZT0	Medtr4g093890	25.39012077370944	4.91	1.0551615068931748	0.5462396254728313	1.931682466243299	0.08353936756796115	leguminosin group485 secreted peptide
ZT0	Medtr3g076970	548.9122035517712	14.64	1.0533669498363638	0.08393106154365852	12.550382783952193	1.6656917962601638e-34	Serine/Threonine-kinase HT1-like protein
ZT0	Medtr5g075180	10.746438850017396	0.35	1.053144804583212	0.5159447615992864	2.041196815951292	0.06639985565366603	DUF641 family protein
ZT0	Medtr4g085900	162.14423410001763	3.18	1.050494901995716	0.1617383176994196	6.495027999165875	5.084739323254025e-10	class I glutamine amidotransferase superfamily protein
ZT0	Medtr7g059040	527.2819786154487	11.63	1.0498662442212918	0.15680877134349988	6.695201009652012	1.4082767324840057e-10	F-box/kelch-repeat plant protein
ZT0	Medtr1g080500	383.0139224695725	3.97	1.0497421941890586	0.13878944614398592	7.563559214005455	3.3571690951070426e-13	phosphoribosylaminoimidazole carboxylase
ZT0	Medtr4g133110	89.16074885181087	4.69	1.0497311541103054	0.37126734096069774	2.8274265961395986	0.009327251334097404	hypothetical protein
ZT0	Medtr8g042000	358.0359410367779	3.98	1.048775407901653	0.11948263792854802	8.777638543005994	2.106002184863539e-17	cytochrome P450 family 72 protein
ZT0	Medtr8g090055	14.807933150470118	0.59	1.0487652191182488	0.4591368599729603	2.2842104621702846	0.03838300916696103	wall-associated receptor kinase galacturonan-binding protein
ZT0	Medtr8g069770	19.31563065657457	4.11	1.0484637599140358	0.5109354154060413	2.0520475353637795	0.06488518713648146	nucleolar RNA-binding Nop10p-like protein
ZT0	Medtr4g461070	272.6566888414554	7.59	1.0481351533390595	0.14626994540772603	7.165758833213434	5.833025240787599e-12	pfkB family carbohydrate kinase
ZT0	Medtr3g053200	518.9977777780846	3.96	1.047629943623505	0.09000105415510325	11.640196367234463	8.183619662194312e-30	disease resistance protein (CC-NBS-LRR class) family protein
ZT0	Medtr2g084895	300.4627469815862	3.94	1.047019136925726	0.13175867870035568	7.9464908668889045	1.8662612467167264e-14	nucleobase-ascorbate transporter-like protein
ZT0	Medtr5g032670	1923.006811058207	276.95	1.0463490707227674	0.10602999645847919	9.868425027558239	1.0367660494555974e-21	hypothetical protein
ZT0	Medtr7g094110	272.3079859469659	3.01	1.0459710622179987	0.15545626456976702	6.728394414421161	1.1294461027427488e-10	sugar porter (SP) family MFS transporter
ZT0	Medtr4g009195	48.26999905755672	2.03	1.0455717750772726	0.25928068446453145	4.032586450612762	1.5653392673848753e-4	hypothetical protein
ZT0	Medtr4g101650	2024.3694462448634	29.4	1.0441084659652602	0.11619411642053391	8.985897893369966	3.457422669860368e-18	monocopper oxidase SKS1-like protein
ZT0	Medtr5g015530	184.31930764054889	7.53	1.0439528686821684	0.12151290489440954	8.591292172541895	1.0225040511154822e-16	sulfate adenylyltransferase subunit 1/adenylylsulfate kinase
ZT0	Medtr1g062190	1609.3008626488127	32.18	1.0423293552606891	0.10154211945553512	10.26499506657551	2.063237556321634e-23	cytochrome P450 family monooxygenase
ZT0	Medtr0291s0010	162.86709852332257	2.1	1.0423006537138007	0.16501250932263561	6.31649477965258	1.5556769344533863e-9	calcium-dependent lipid-binding (CaLB domain) family protein
ZT0	Medtr1g021760	4135.149325411278	250.28	1.041795776515766	0.13502595873808104	7.715522157754921	1.0826847006438188e-13	30S ribosomal protein S9P
ZT0	Medtr3g060310	22.776182572695255	7.74	1.0413230745340112	0.3482729128112639	2.9899628602420916	0.005800478133828866	hypothetical protein
ZT0	Medtr8g044030	430.1173235688823	8.53	1.0410952997571923	0.13911093446952863	7.483921402204638	6.00224467478199e-13	isoprenylcysteine carboxyl methyltransferase
ZT0	Medtr8g014075	55.60708310604888	2.41	1.040590372228217	0.23470220126078165	4.4336626015364855	2.961421873056499e-5	sequence-specific DNA-binding transcription factor
ZT0	Medtr6g059820	8.521522936229989	0.14	1.0394173505773323	0.5849670924866299	1.7768817492944518	0.1136307294158058	PPR containing plant-like protein
ZT0	Medtr7g099540	1174.1700505669473	21.86	1.0392480556985388	0.0801506859155228	12.966177941307768	9.160614527369583e-37	transcription factor
ZT0	Medtr4g049340	381.16167712314507	15.02	1.0375047123637415	0.11222571916770138	9.24480341991282	3.453802648270696e-19	major intrinsic protein (MIP) family transporter
ZT0	Medtr2g078900	22.452570669467505	0.76	1.0373165546361363	0.33982185150802424	3.052530465692086	0.004804122706541434	F-box protein interaction domain protein
ZT0	Medtr5g029590	3328.423704894362	92.74	1.037228627233623	0.06980104786816729	14.85978590454156	4.6259301381463754e-48	plastid fibrillin
ZT0	Medtr2g010520	138.3294554733977	5.03	1.0367671669952336	0.13090855210215072	7.919781789246453	2.296268358980273e-14	magnesium and cobalt efflux protein CorC, putative
ZT0	Medtr7g007010	65.36878187524349	2.41	1.036305687825032	0.2634462008154303	3.933652049706593	2.316199356763431e-4	seed specific protein Bn15D17A
ZT0	Medtr7g007220	116267.40868320334	5757.98	1.0359955132320198	0.07065144235861817	14.66347294048764	8.0250166877261845e-47	ribulose bisphosphate carboxylase small chain
ZT0	Medtr2g089030	2728.0239225387786	23.58	1.0349088045881698	0.09305273612523432	11.121745019892222	2.6482220742528728e-27	beta-amylase
ZT0	Medtr5g011070	299.98665737704545	8.49	1.0345333475016596	0.11902240770850185	8.691920852713201	4.3700306900429684e-17	class II knotted-like homeobox protein
ZT0	Medtr5g036310	317.0695775587787	18.2	1.0341381889610237	0.13827140374348523	7.47904599912437	6.218270093495658e-13	matrixin family protein
ZT0	Medtr4g035825	764.360755202588	47.04	1.0310551080759736	0.08837722042534121	11.6665256399072	6.061949087752877e-30	low psii accumulation protein, putative
ZT0	Medtr2g017520	12029.484707538872	243.42	1.0284463016300458	0.09287824238487882	11.0730594725109	4.501625039987822e-27	pyridoxal biosynthesis protein PDX1, putative
ZT0	Medtr3g098380	234.73990368861772	2.67	1.0277723475242642	0.14080549400090034	7.299234698311505	2.2716665629178726e-12	respiratory burst oxidase-like protein D
ZT0	Medtr3g106620	855.3049658052539	55.77	1.0276464035410977	0.18607766390312244	5.522674683169502	1.5139036172727326e-7	Kunitz type trypsin inhibitor
ZT0	Medtr4g104470	19294.07871926641	650.4	1.0275314499153436	0.1319190465829839	7.789106095979653	6.224748268781205e-14	31 kDa ribonucleoprotein
ZT0	Medtr7g086830	20.235406297630952	1.29	1.0272699975028743	0.40304291208381343	2.548785666994317	0.019939278121364014	tRNA-specific adenosine deaminase
ZT0	Medtr1g054665	21.482908768345865	0.78	1.0263545904879559	0.3483255893344079	2.9465380147612708	0.006591925744986762	histone-lysine N-methyltransferase
ZT0	Medtr4g094868	314.1329126245951	6.07	1.0255313302518054	0.13218041905714542	7.758572242144568	7.836404443188954e-14	AP2 domain transcription factor
ZT0	Medtr7g056243	161.47692894220447	2.5	1.0248883172732484	0.2152021705538227	4.762444145594343	6.7609605479766725e-6	hypothetical protein
ZT0	Medtr5g099290	1291.9596344086067	19.77	1.0248628638231323	0.09064321253608622	11.306559367753227	3.4832986433476626e-28	ClC chloride channel family protein
ZT0	Medtr4g073010	468.51687856411405	9.09	1.024739877304761	0.1438130533992642	7.125499758772272	7.703704424981802e-12	high-affinity nickel-transport family protein
ZT0	Medtr1g084570	5.616900382925566	0.11	1.0244392834656784	0.7376944240753472	1.3887041165449332	0.22437163725364684	PPR containing plant-like protein
ZT0	Medtr4g014900	123.57502755504997	2.17	1.0235144777304803	0.22309679388256437	4.587759689048902	1.4999767292953107e-5	receptor-like kinase
ZT0	Medtr4g061800	10.006837920936322	0.07	1.0229462768155206	0.5479230392667338	1.8669524796484078	0.09529219751239493	DNA-directed RNA polymerase I protein
ZT0	Medtr1g010130	127.22366094667525	5.59	1.0224381708572392	0.18249223387689756	5.602639351474747	9.807698504608604e-8	endonuclease V-like protein
ZT0	Medtr1g034500	55.32714329177691	1.42	1.0188837796400145	0.291278592927402	3.497969999786288	0.001134403983894508	bZIP transcription factor
ZT0	Medtr4g011460	4295.69983905119	40.21	1.0188570073033547	0.06821020831579236	14.937016503253576	1.5092245179135514e-48	plastidic ATP/ADP-transporter-like protein
ZT0	Medtr3g109380	17.525791761990735	0.19	1.0185333903836273	0.5170439726475062	1.9699163790040166	0.07713432257883092	PPR containing plant-like protein
ZT0	Medtr4g064780	1155.3508653654922	8.53	1.0185266454537343	0.15666649254895515	6.501241132563589	4.889559951029572e-10	translocon at the outer envelope membrane ofs protein 75-III
ZT0	Medtr7g094220	940.2286578111879	40.85	1.018330674053194	0.0769576707157253	13.232347920388804	2.973373095649456e-38	resistance to phytophthora protein, putative
ZT0	Medtr4g108370	349.9637304908264	10.5	1.0180950517539218	0.11222379274966178	9.072007163623422	1.6169047331599195e-18	TCP family transcription factor
ZT0	Medtr5g006570	35.72620445013831	0.32	1.0179306734276947	0.3028121315905181	3.361591453027402	0.0018009755754696953	pentatricopeptide (PPR) repeat protein
ZT0	Medtr7g033680	313.8463793248934	32.71	1.017915600156741	0.128916291124741	7.895942330297055	2.7583944987237364e-14	hypothetical protein
ZT0	Medtr4g053420	241.2335963914395	4.35	1.0176633100291907	0.17066174683594973	5.963042854632383	1.2874339637353811e-8	UDP-D-apiose/UDP-D-xylose synthase
ZT0	Medtr7g079420	169.2052395151722	0.84	1.0172228089974702	0.16137750996739372	6.303374052573991	1.6864449285249648e-9	hypothetical protein
ZT0	Medtr3g117050	143.06721209851582	3.32	1.0161984519343306	0.23788358554155467	4.27183090258582	5.914438175576575e-5	transmembrane protein, putative
ZT0	Medtr1g018200	976.3397578255364	12.35	1.0157917636566665	0.12947502758821677	7.845464740021506	4.0534122511072014e-14	beta-like galactosidase
ZT0	Medtr6g015995	461.71525066916627	9.98	1.0156183804757168	0.2269299492356711	4.4754708838408	2.46499173928915e-5	pollen Ole e I family allergen
ZT0	Medtr3g077670	3332.9224703131185	28.75	1.015433872036068	0.12758153652603543	7.959097371654946	1.6925538247266834e-14	boron transporter-like protein
ZT0	Medtr1g082380	37.26687596717707	0.86	1.0147322515404562	0.3406803828793029	2.97854617563923	0.005998733412448506	protein translocase family protein
ZT0	Medtr8g464010	690.4359976077501	17.86	1.014043498370502	0.09026582155825584	11.23396963396669	7.719769428592386e-28	hypothetical protein
ZT0	Medtr4g132160	12.411960077789097	0.18	1.0125188569967871	0.5455567180792412	1.855936923591729	0.0974204901914443	transmembrane protein, putative
ZT0	Medtr3g097260	373.95443243947744	3.48	1.0123576931260867	0.1521034835340259	6.655716684487506	1.8196549757134068e-10	phosphatidylinositol-4-phosphate 5-kinase family protein
ZT0	Medtr4g070140	1235.2286398559465	22.2	1.01228610228151	0.178469371249637	5.672043864969737	6.686972493267311e-8	RNA-binding (RRM/RBD/RNP motif) family protein
ZT0	Medtr8g104110	225.2524960339757	4.22	1.0122055735286808	0.137078498320468	7.384130887998956	1.239253205280773e-12	aluminum activated malate transporter family protein
ZT0	Medtr4g046047	12.806011547470558	1.01	1.011649610024606	0.47606209500440516	2.1250370920945616	0.05523027082973214	acyl-CoA N-acyltransferase-like protein
ZT0	Medtr7g086430	3021.6916169010283	48.12	1.0114971507424764	0.07804364547706619	12.960659955841168	9.7780809638722e-37	M50 family peptidase
ZT0	Medtr2g026645	36.086837671702554	0.54	1.0109269011820357	0.33207034784011	3.044315482419379	0.004922143759445064	pentatricopeptide (PPR) repeat protein
ZT0	Medtr1g105570	9.571344722731244	0.42	1.010877649286839	0.5802807460851496	1.7420492685768076	0.1213570291077595	late embryogenesis abundant hydroxyproline-rich glycoprotein
ZT0	Medtr7g011060	212.93002042424473	10.54	1.010442140800386	0.2871256673336525	3.519163403898016	0.00105584913847682	expansin A10
ZT0	Medtr8g032950	37.24006208318644	0.52	1.009952110348967	0.37909700008663944	2.664099452430779	0.014694641249088904	UDP-glucosyltransferase family protein
ZT0	Medtr2g042130	158.64408400755494	1.85	1.009439664401403	0.2154571020023352	4.685107406626412	9.64863638058342e-6	subtilisin-like serine protease
ZT0	Medtr0096s0020	58.49131884089341	1.22	1.0081500631447593	0.2167224190505308	4.651803295485087	1.1232300728035912e-5	CAAX protease self-immunity protein
ZT0	Medtr5g024740	245.7892676329975	1.29	1.0076116446694618	0.17474286865308714	5.76625330942603	3.949994792681273e-8	tonoplast monosaccharide transporter 2
ZT0	Medtr7g085020	17.778429867436177	1.16	1.007575822847291	0.44078841331911356	2.2858491566515964	0.03822266922038479	flowering locus protein T
ZT0	Medtr3g053220	58.9120662871148	0.31	1.0060566215310796	0.3017020041054211	3.3346037077683515	0.0019697898829665636	1,4-alpha-glucan-branching enzyme/amyloplastic protein
ZT0	Medtr4g083370	959.7023242344707	27.33	1.0054100387826375	0.13404560232267224	7.500507449415848	5.326773926234895e-13	antitermination NusB domain protein, putative
ZT0	Medtr1g110790	53.57567679794002	4.64	1.005373477519412	0.2873041726863766	3.499334757719949	0.0011292829560198264	hypothetical protein
ZT0	Medtr4g122980	1090.4865932910816	9.07	1.0049723515012583	0.09292082473462852	10.815361942506934	7.079640446519935e-26	beta-glucosidase
ZT0	Medtr8g104080	122.87853534570611	3.82	1.0045056276181834	0.19228923238847564	5.223930716977503	7.196131277123268e-7	cytochrome P450 family 71 protein
ZT0	Medtr4g115970	13926.321803086872	159.26	1.0042486458110453	0.08582932359673978	11.700530817758787	4.122979290756125e-30	vacuolar H+-translocating inorganic pyrophosphatase
ZT0	Medtr5g097180	95.4956561546845	2.57	1.004215724499021	0.1742862728773194	5.761875034219656	4.047645175549691e-8	serine carboxypeptidase-like protein
ZT0	Medtr3g088630	539.8971456503882	10.54	1.004096344957645	0.2158799128499227	4.651180055161879	1.1262264714142116e-5	two-component response regulator ARR3-like protein
ZT0	Medtr7g085200	549.4470443566253	4.03	1.0012579207244006	0.1880482590926976	5.324473225943744	4.303068592189001e-7	Nod factor-binding lectin-nucleotide phosphohydrolase
ZT0	Medtr1g079430	153.16258430951834	3.02	1.0009096130446915	0.15058967862963724	6.6466016937744135	1.9272132558444096e-10	Serine/Threonine-kinase PBS1-like protein
ZT0	Medtr4g013350	408.5893416812936	13.22	0.999951256873889	0.11969719953705632	8.354007117470783	7.245193442352355e-16	disease resistance response protein
ZT0	Medtr1g077790	129.48252215758833	14.81	0.9990556220633932	0.2943320558875417	3.39431469348725	0.0016144328962268938	plastocyanin-like domain protein
ZT0	Medtr8g075280	59.275286222658515	2.36	0.9976760944225554	0.2704059051181259	3.6895499526414706	5.774142482219021e-4	transmembrane protein, putative
ZT0	Medtr5g038580	8.390600765510618	0.13	0.9970078076223572	0.6154415538344049	1.6199877980462452	0.15180625921594204	PPR containing plant-like protein
ZT0	Medtr1g050750	52.47547768502251	0.31	0.9969236154219866	0.36276328140008796	2.7481381565806537	0.011651462065353542	DNA-binding protein
ZT0	Medtr6g003960	107.46850349808825	1.2	0.9969008256550141	0.21758290070250855	4.58170574266786	1.5419014179795073e-5	transcription termination factor family protein
ZT0	Medtr8g096030	4.642373806671912	0.07	0.996758275998417	0.9128871571029633	1.0918745742481664	0.34769995213181376	PPR containing plant-like protein
ZT0	Medtr6g016790	232.87963517601787	4.62	0.995110657203057	0.15985728645948352	6.224994050898467	2.72237279940048e-9	glycoside hydrolase family 81 protein
ZT0	Medtr1g037650	203.78527499249805	16.11	0.994980034229284	0.1471969764903072	6.759514073951123	9.204988864009895e-11	Myb/SANT-like DNA-binding domain protein
ZT0	Medtr8g102480	304.9214303144565	4.55	0.994793138971369	0.158841177786776	6.262816436092861	2.1634771853610013e-9	tRNA/rRNA methyltransferase (SpoU) family protein
ZT0	Medtr7g082680	101.96318040549747	2.69	0.994651627427214	0.2507710489870781	3.966373436825505	2.0342505072880456e-4	transmembrane protein, putative
ZT0	Medtr1g051385	143.00115126353305	1.9	0.9941931788008089	0.15295872244610856	6.499748186319285	4.936206760340065e-10	folylpolyglutamate synthase
ZT0	Medtr1g070365	123.0695341515824	2.15	0.9932814999930297	0.20644728050063385	4.811308231255582	5.382534593219055e-6	cytochrome P450 family-dependent fatty acid hydroxylase
ZT0	Medtr4g485630	335.31052648446104	5.14	0.9931480449808069	0.25725550535879627	3.8605511808023527	3.056671597290037e-4	flavonoid glucosyltransferase
ZT0	Medtr2g101290	1489.4935491471294	13.53	0.9929643639809285	0.10249676397473238	9.687763061726663	5.831259247567445e-21	ATP-dependent zinc metalloprotease FTSH protein
ZT0	Medtr4g096690	747.2667867637781	17.31	0.9926898695028877	0.1199503423660932	8.275840234562724	1.3704858984327044e-15	3-oxoacyl-(acyl carrier) synthase II
ZT0	Medtr2g101870	390.7669492832995	12.54	0.9925977287344575	0.13560448811109102	7.319799975361387	1.96661149231445e-12	late embryogenesis abundant protein
ZT0	Medtr7g094760	20.135400153643204	3.17	0.9920058243172297	0.3947629882561945	2.5129149738663816	0.02183231678389606	salt stress response/antifungal domain protein
ZT0	Medtr0287s0050	45.97187441974345	6.83	0.9916885460346452	0.2534592685180068	3.912615040014571	2.511311352606479e-4	complex 1 protein, LYR family protein
ZT0	Medtr4g048220	202.83342638929255	2.4	0.9911163112625635	0.14819938394577237	6.68772220824631	1.4787477844393114e-10	NEDD8-activating enzyme E1 regulatory subunit-like protein
ZT0	Medtr8g032690	375.8301781834679	39.05	0.9908926140934861	0.17716738933109077	5.592974067263044	1.0342922368923282e-7	zinc finger, C3HC4 type (RING finger) protein
ZT0	Medtr7g012870	46.20030806043376	6.83	0.990192133675192	0.2522900845653328	3.924815893502833	2.3936001516948463e-4	complex 1 protein, LYR family protein
ZT0	Medtr8g063120	126.65148500506325	4.71	0.9889004925908016	0.2025344419397141	4.882628767334078	3.842649482071844e-6	carboxy-terminal domain cyclin
ZT0	Medtr5g094120	436.1389258390423	8.69	0.9886540228869747	0.2331232506269952	4.240906989019527	6.721638813518795e-5	cell division FtsZ-like protein
ZT0	Medtr1g083740	17.823823696873248	1	0.9886012465335163	0.4310293734024623	2.2935820794060735	0.037508931822901784	single-stranded DNA-binding protein
ZT0	Medtr3g462140	63.99194616294826	2.33	0.9880154790184036	0.21105574332488633	4.68130107929597	9.816514513345593e-6	uncoupling protein
ZT0	Medtr3g092140	716.1672057453842	12.97	0.9863894968323806	0.09013712422707865	10.94321019547297	1.823868876553837e-26	aldo/keto reductase family oxidoreductase
ZT0	Medtr6g010920	4.3899576661591055	0.17	0.9862297190448975	0.8136160306675779	1.2121562037509128	0.29342241246810075	DUF247 domain protein
ZT0	Medtr4g095660	1268.6597946585566	27.98	0.9862083313769483	0.174700880778094	5.645125124638812	7.76687973925218e-8	acetamidase/formamidase, putative
ZT0	Medtr1g048970	4343.440242619612	205.65	0.9853049933622162	0.08101187465179784	12.16247615052999	1.8280772629833273e-32	pterin-4-alpha-carbinolamine dehydratase
ZT0	Medtr0288s0040	886.6482876165682	10.4	0.9852110662798103	0.0965957927309052	10.199316537775028	3.94208470779864e-23	glycogen/starch/alpha-glucan phosphorylase family protein
ZT0	Medtr1g054980	1590.6671806613745	34.42	0.9849603212432471	0.08705899276315944	11.313711426949228	3.2170736901961264e-28	sucrose-6F-phosphate phosphohydrolase
ZT0	Medtr1g114560	324.9630678779043	6.07	0.9846600674663736	0.11190516090724362	8.799058591073761	1.748991458093482e-17	riboflavin kinase
ZT0	Medtr2g022990	159.728316359652	5.3	0.9841007552228912	0.13872870589399744	7.093706734169656	9.591912576567329e-12	hypothetical protein
ZT0	Medtr6g092790	114.78691234422935	8.45	0.9839980332067524	0.22723267617958517	4.330354462001252	4.6235060993671844e-5	phospholipase A2 family protein
ZT0	Medtr5g027010	643.9122764198162	39.54	0.9835855068271637	0.15693731706315675	6.267378117795505	2.1044352816881374e-9	transmembrane protein, putative
ZT0	Medtr1g107135	104.12861934979462	0.79	0.9832904873050241	0.21939524825840925	4.481822168485982	2.3968143905881482e-5	alpha-L-fucosidase-like protein
ZT0	Medtr2g015010	183.1963980692016	6.57	0.9828554384865437	0.12242308910886965	8.028350253541634	9.864696898309862e-15	aldolase-type TIM barrel family protein
ZT0	Medtr8g031010	40.5307358218228	9.18	0.9827104813816857	0.28176521984457037	3.4876926326243405	0.0011757234829819995	hypothetical protein
ZT0	Medtr4g019165	470.34893057953866	6.92	0.9826231921694168	0.15924816703834754	6.170389339130023	3.77327894372002e-9	pfkB family carbohydrate kinase
ZT0	Medtr2g089795	5912.582249161153	242.3	0.9821561455583682	0.13027644726612855	7.539015425804642	4.020945560294618e-13	photosystem II biogenesis protein
ZT0	Medtr1g103500	303.14442067299933	12.05	0.9818205173969453	0.12466467906652488	7.875691212207877	3.214986754592586e-14	senescence-associated protein SAG102
ZT0	Medtr4g098660	1177.465204676322	10.61	0.9811390136704611	0.1187315141154016	8.263509658580103	1.5169556844461921e-15	pentatricopeptide (PPR) repeat protein
ZT0	Medtr5g043190	82.59043342388107	9.56	0.9808855807035827	0.18411399259178907	5.327599314400655	4.2328349803918665e-7	DUF538 family protein
ZT0	Medtr8g027265	1473.4609239418257	11.12	0.9792253932551959	0.11093212169748769	8.827248395424611	1.3727910597569e-17	WNK kinase
ZT0	Medtr4g056420	387.42466998329917	6	0.9786683818588655	0.11848335437742222	8.259965182462434	1.5597565918442153e-15	eukaryotic aspartyl protease family protein
ZT0	Medtr8g104030	314.04069980784664	9.7	0.9781266062246138	0.12197311552735737	8.019198345435635	1.0580007791303614e-14	cytochrome P450 family protein
ZT0	Medtr5g053940	1074.7730101849652	27.68	0.9779838293114715	0.08004172699720725	12.218424889128073	9.383739286174199e-33	methionine aminopeptidase 1B
ZT0	Medtr3g099470	1017.2021389842035	13.21	0.977944706952021	0.10701810541851763	9.138123900881585	9.007376692657286e-19	seryl-tRNA synthetase/serine-tRNA ligase
ZT0	Medtr1g080430	1655.525286107922	12.32	0.9770090994600857	0.09995969547417008	9.77403037119644	2.5632308307307114e-21	FTSH extracellular protease family protein
ZT0	Medtr5g030860	142.99441121073122	1.83	0.9752219310719007	0.13956431626334095	6.987616585544511	1.9850495392563817e-11	glycoside hydrolase family 3 protein
ZT0	Medtr3g466590	21.112615296644684	0.32	0.9739654155636299	0.380167884620049	2.5619350159917893	0.019270972457827874	hypothetical protein
ZT0	Medtr2g033600	17.28879087132936	3.35	0.9733815270884121	0.4859914591081517	2.002877846607994	0.07203213742957709	hypothetical protein
ZT0	Medtr5g015540	34.1222359808404	0.47	0.9726348382133159	0.3699074344669131	2.6294006218475032	0.01612858820579846	BTB/POZ domain plant-like protein, putative
ZT0	Medtr1g107315	3065.267986838614	45.68	0.9713666752984086	0.11714579840008826	8.291946348608237	1.2051898721021254e-15	limonoid UDP-glucosyltransferase-like protein
ZT0	Medtr1g052730	659.810549652752	7.36	0.9700353207070996	0.09951050905456972	9.748069122781295	3.2887945573011396e-21	exostosin family protein
ZT0	Medtr8g099535	49.748717856312	0.89	0.9689344258920837	0.29305853209369287	3.306282942761443	0.00216318122678706	UDP-D-glucose/UDP-D-galactose 4-epimerase
ZT0	Medtr0475s0040	79.08100313475319	7.25	0.9681294048889612	0.18715716995587212	5.1728149400700305	9.311145071070077e-7	hypothetical protein
ZT0	Medtr4g015010	387.3429993055124	21.83	0.9673716742275478	0.13669121925438715	7.0770579083593885	1.0767437977092645e-11	transmembrane protein, putative
ZT0	Medtr2g072250	1578.6041882878383	29.5	0.9670499579800458	0.07239223426174887	13.358476469775468	5.726150779418674e-39	cytochrome P450 family 709 protein
ZT0	Medtr8g087425	854.3554335831868	31.07	0.9667319429668756	0.09616917525785375	10.052409624755793	1.7027764320276882e-22	glutathione S-transferase
ZT0	Medtr4g030890	129.88066259004492	3.89	0.9667021114912414	0.21658479095454886	4.463388713633671	2.6017479377170272e-5	gaiacol peroxidase
ZT0	Medtr2g105080	18.745022847400897	2.4	0.9659283583818183	0.440064187890961	2.194971517703131	0.04729561303364382	hypothetical protein
ZT0	Medtr8g010130	144.27673363998358	3.36	0.9657454713759623	0.15993528392746642	6.03835156108483	8.304980198690943e-9	ribosomal RNA large subunit methyltransferase J
ZT0	Medtr7g117430	650.4627951109057	11.7	0.9655012307819136	0.1309999217647414	7.370242804540194	1.3711859594473283e-12	eukaryotic aspartyl protease family protein
ZT0	Medtr3g084950	265.1860873994225	5.75	0.9638965459157719	0.14294913470862305	6.742933756685602	1.026220538333359e-10	15-cis-zeta-carotene isomerase
ZT0	Medtr2g007030	241.95250763347732	2.37	0.9615562751780032	0.13026396951489272	7.381598140751201	1.2627053459836049e-12	PPR containing plant-like protein
ZT0	Medtr4g009540	114.88353980401433	2.2	0.9609043252151703	0.22789943831917914	4.2163523188214205	7.443879164383166e-5	helix loop helix DNA-binding domain protein
ZT0	Medtr4g133770	1649.5070662409428	81.63	0.9608332251916605	0.10848883359747324	8.856517240812503	1.0702663966754898e-17	transmembrane protein, putative
ZT0	Medtr3g075110	41.22395898536944	1.12	0.9608209694383808	0.27846932972537086	3.45036550483298	0.0013355035379101056	oxygen-independent coproporphyrinogen III oxidase, putative
ZT0	Medtr8g024210	616.2103945750379	12.03	0.9603445855306749	0.20927431410922065	4.588927167762544	1.4923132179694254e-5	transcription factor
ZT0	Medtr7g082550	4.113093132743645	0.07	0.959508283602208	0.9464654581945117	1.0137805614507864	0.3858487828348223	PPR containing plant-like protein
ZT0	Medtr2g018690	504.477106177021	5.06	0.9592978673041721	0.1156909196104191	8.291902860955199	1.2051898721021254e-15	auxin response factor 2
ZT0	Medtr4g053380	114.34016411426266	4.35	0.9568516389212256	0.20097836457174628	4.760968380651957	6.806380020374189e-6	fasciclin-like arabinogalactan protein
ZT0	Medtr3g091570	4260.942198899177	64.1	0.9567188837174262	0.054241153027065926	17.63824753577843	2.180902872928561e-67	starch synthase 2/amyloplastic protein
ZT0	Medtr5g088880	42.63754524209988	1.69	0.956274619678896	0.3354765465421414	2.850496195741577	0.008727157498762406	papain family cysteine protease
ZT0	Medtr7g015520	659.8200074214575	76.85	0.9561656453897093	0.13548556596446434	7.057324804920518	1.2336294267334319e-11	RALF
ZT0	Medtr7g095930	1347.5679609327174	90.08	0.9561165372375942	0.05643087689792233	16.943145132532866	2.996814637059566e-62	transmembrane protein, putative
ZT0	Medtr5g030340	558.3961815100921	19.12	0.9555659277619731	0.1175629552289146	8.128121021637535	4.483720659753571e-15	transmembrane protein, putative
ZT0	Medtr2g049020	102.18386256420064	0.43	0.9552526521933251	0.32803281989884253	2.912064263837692	0.007302218378703181	inositol transporter 4
ZT0	Medtr1g017950	971.8072237291386	59.38	0.9548710518658817	0.1185988668965869	8.05126622920005	8.245592866071676e-15	GATA type zinc finger transcription factor family protein
ZT0	Medtr4g133030	326.4895265188211	4.35	0.954424116373444	0.16459459554844946	5.798635812999724	3.290158037125202e-8	importin subunit alpha-like protein
ZT0	Medtr7g098450	1465.1683520742222	19.1	0.9533843679449905	0.11073486950211638	8.609612963211822	8.773277298927656e-17	TPR repeat protein
ZT0	Medtr1g008060	77.68800455104862	0.47	0.9527582072524076	0.19451336856297655	4.898163114911756	3.572163769781825e-6	transcription factor jumonji (JmjC) domain protein, putative
ZT0	Medtr1g024820	23.730119589623914	0.3	0.9519178285238771	0.3713502685795083	2.5633960954576924	0.01919917853321475	transcription factor bHLH140-like protein
ZT0	Medtr1g103810	540.5210507058542	16.8	0.9516586447217434	0.10933421272751918	8.704124911874112	3.939776858248066e-17	photosystem II Pbs27 protein
ZT0	Medtr3g072410	152.2214400947997	3.32	0.9514961194742261	0.1842404598109969	5.164425449493116	9.701516039163693e-7	LysM domain GPI-anchored protein
ZT0	Medtr2g038200	19.24714304169858	0.19	0.9513412321320042	0.3907614780510368	2.43458295038937	0.026616287464173816	heat shock-like protein, putative
ZT0	Medtr8g076220	708.6773944160412	19.95	0.9506241457327425	0.13224306608145323	7.188461171546182	4.975067189364513e-12	transmembrane protein, putative
ZT0	Medtr4g127700	40.408464283539466	4.77	0.9502437095233015	0.4277515556843348	2.221485104836292	0.04449424139915835	transcription factor/transcription regulator
ZT0	Medtr8g064820	266.4597598032248	6.28	0.9502168407936973	0.14083291318846633	6.747121956655771	9.981971601983927e-11	OBP32pep, putative
ZT0	Medtr5g008300	968.6572306346096	5.08	0.9501156346814983	0.09402163035099945	10.105287805950056	1.009054293302298e-22	PPR containing plant-like protein
ZT0	Medtr1g088980	733.019710337035	10.56	0.9501109738176862	0.12987625911950404	7.315509241326803	2.0265533836813025e-12	DegP protease
ZT0	Medtr2g020360	1479.3894978252122	125.86	0.9500965853608212	0.1012897754850285	9.379985105221737	1.0159954320264363e-19	acyl carrier protein
ZT0	Medtr4g072990	6233.905609460193	34.51	0.9494676637908226	0.07976531927795087	11.903264130145333	3.923864559493066e-31	PPR containing plant-like protein
ZT0	Medtr4g075640	430.2691694776306	5.49	0.9491620096546525	0.0998551280077735	9.505390745488427	3.2126311872782755e-20	Rop guanine nucleotide exchange factor
ZT0	Medtr1g017380	7714.878511826312	108.65	0.9485140502816286	0.11822697276141311	8.022822780007814	1.029744733868017e-14	TCP-1/cpn60 chaperonin family protein
ZT0	Medtr1g096050	274.4731900283433	4.99	0.94815286561472	0.14974645988234603	6.331721406700847	1.4159583294322784e-9	alpha/beta fold hydrolase
ZT0	Medtr5g076600	43.54620960062523	13.54	0.9475648854153943	0.29649273194225506	3.1959126930637276	0.0030854347941947865	hypothetical protein
ZT0	Medtr2g090270	28.043672314241974	0.36	0.9472863958733213	0.5751459608053117	1.6470365097356219	0.14459266673460508	expansin-like protein B1
ZT0	Medtr2g019640	163.94262771132406	3.76	0.9464243739001211	0.1849662956959821	5.116739621880635	1.2301769558575383e-6	cytochrome P450 family monooxygenase
ZT0	Medtr7g092740	64.59731388323016	2.32	0.9459128583979326	0.2568632486847182	3.6825542900416046	5.920054587155535e-4	polygalacturonase inhibitor
ZT0	Medtr4g126360	11.635346310836612	0.81	0.9451095506710103	0.5341031660779612	1.7695262089741217	0.11519704581567139	transmembrane protein, putative
ZT0	Medtr5g077100	114.55708270647095	1.32	0.9448766410806639	0.22618120532023545	4.177520584625384	8.730112903574553e-5	L-type lectin-domain receptor kinase
ZT0	Medtr3g114540	144.58478667004758	2.67	0.9430177742026531	0.15912065203847398	5.926432314861554	1.5895839771740914e-8	RNA pseudouridine synthase, putative
ZT0	Medtr8g009280	1079.2021204584962	98.34	0.9425924275353202	0.20752065546269122	4.54216196182352	1.840406826545632e-5	GroES chaperonin
ZT0	Medtr8g105860	500.6947175458706	9.83	0.9418899905967044	0.1261003430183312	7.469368980699616	6.667844236637936e-13	aspartate-semialdehyde dehydrogenase
ZT0	Medtr7g034535	890.8913708065618	10.7	0.9414161822989708	0.15456077790961376	6.090912552533253	6.073624489904385e-9	beta-amyrin synthase
ZT0	Medtr3g102270	505.9023016210821	20.69	0.9406210529403404	0.10409501247133333	9.036177916779417	2.2172259548888648e-18	DCL protein
ZT0	Medtr3g088605	375.7183585825853	9.89	0.9395500580101771	0.14064537213841616	6.6802770949727295	1.5519574982616407e-10	plastid transcriptionally active protein
ZT0	Medtr0007s0070	173.40146182681684	4.19	0.9392505996505371	0.18641242736201616	5.038562143855872	1.8104671175904757e-6	disease resistance protein (NBS-LRR class) family protein
ZT0	Medtr6g091880	685.5353060263836	13.86	0.938904254992523	0.10234404294941685	9.174000048606374	6.532000972336834e-19	PPR containing plant-like protein
ZT0	Medtr0874s0010	380.8755588245772	34	0.9372853926991123	0.0973611340941428	9.626894770892966	1.0289600379624086e-20	hypothetical protein
ZT0	Medtr1g085070	499.73472124594616	6.69	0.9362029810539644	0.19204609032719844	4.874886957911556	3.988249738709281e-6	pectinacetylesterase family protein
ZT0	Medtr8g096640	29.095919504588625	1.54	0.9360582566285569	0.35560336931675063	2.6323098637312716	0.01600803557492671	transmembrane protein, putative
ZT0	Medtr7g082240	298.0750838861572	11.05	0.935983576104125	0.1387158037440067	6.747490558692486	9.95896331976097e-11	group IIB intron splicing facilitator CRS2
ZT0	Medtr4g101740	8638.336581652187	399.26	0.9359817556534716	0.07870940643850008	11.891612426080291	4.484593878366865e-31	translation elongation factor EF protein
ZT0	Medtr3g027140	1717.9490083449355	63.13	0.9354456927170107	0.1878276016405159	4.980341997377811	2.3996805928162835e-6	RNA-binding (RRM/RBD/RNP motif) family protein
ZT0	Medtr8g088740	51.968419470841816	2.57	0.9353319628858476	0.277101241791325	3.3754159917847373	0.001719322784433877	Serine/Threonine kinase family protein
ZT0	Medtr1g107490	3530.1983590795007	296.86	0.935206540102506	0.12177498119957476	7.679792112386479	1.417145524023751e-13	stress enhanced protein
ZT0	Medtr4g068230	262.8885960526396	3.31	0.9349335044231839	0.13348737026911284	7.0039098271120475	1.7787394395247808e-11	orn/lys/arg decarboxylase
ZT0	Medtr8g099450	2031.4859391437108	88.31	0.934926126432635	0.092261161297606	10.133474511737958	7.642357243914671e-23	nucleoside diphosphate kinase-like protein
ZT0	Medtr5g097410	996.2543780191943	4.77	0.9343057072270872	0.14427261208764003	6.475974155507302	5.736526463238247e-10	cytokinin receptor histidine kinase
ZT0	Medtr8g010120	1874.4207190157142	42.99	0.9339807396006591	0.09496086179952175	9.835428216441933	1.4288395515062872e-21	alpha/beta fold hydrolase
ZT0	Medtr5g042420	4176.298122109135	262.22	0.933952440373514	0.09336957576810793	10.002749104195056	2.7783977969851357e-22	NAD(P)H dehydrogenase
ZT0	Medtr3g083680	179.75808658623671	2.47	0.9339238000205916	0.14584707206123104	6.4034456559299455	9.046091913563134e-10	PPR containing plant-like protein
ZT0	Medtr5g092820	683.8354786995444	97.78	0.9335541956191502	0.11396124971330475	8.19185642459798	2.70472455474978e-15	eukaryotic translation initiation factor SUI1
ZT0	Medtr5g034970	182.97968682556103	2.4	0.9309989629303286	0.19349742460088018	4.811428187484484	5.380552223468656e-6	nodulin MtN21/EamA-like transporter family protein
ZT0	Medtr4g097500	974.7639281939585	16.75	0.930737417808531	0.11040829089775475	8.429959473518654	3.889467590848441e-16	thioredoxin-like protein
ZT0	Medtr3g091560	482.61146675224677	10.09	0.9291088484193903	0.13790887179644398	6.737121668218503	1.06612788688299e-10	IQ calmodulin-binding motif protein
ZT0	Medtr3g105080	213.69753759827844	8.79	0.9272934692413447	0.15955698654846776	5.811675748586953	3.0548608892475774e-8	ferredoxin-like protein
ZT0	Medtr5g011460	732.8466258235496	47.5	0.9272471113419832	0.1337664308892469	6.931837122197764	2.8995421619124316e-11	ycf49-like protein
ZT0	Medtr3g113270	22.820675024365055	0.51	0.9266419995052714	0.3952671842533099	2.3443433617080287	0.033248286503303214	ATRAD3-like protein
ZT0	Medtr0110s0030	58.993025503019204	0.84	0.9265172228885568	0.3496557657577965	2.6497982119086436	0.015274376442247432	glycoside hydrolase family 1 protein
ZT0	Medtr8g077360	50.62851320444223	8.79	0.9250426058739939	0.33764950470384647	2.739653377206497	0.011934587318516307	MYB family transcription factor
ZT0	Medtr3g073960	474.41544029693256	37.05	0.92461740002233	0.16383712246928098	5.643515865555398	7.837278124358841e-8	DUF581 family protein
ZT0	Medtr5g041910	2807.650225713792	139.29	0.9242668914143292	0.08489154750611108	10.887619775664874	3.2894052284233254e-26	oxygen-evolving enhancer protein
ZT0	Medtr4g005880	134.3187257281544	1.64	0.9236113206083418	0.16722631998731027	5.523121723173892	1.5105350185210677e-7	D-3-phosphoglycerate dehydrogenase family protein
ZT0	Medtr3g027870	224.87105358544179	6.99	0.9235736256688188	0.14937568333649084	6.182891385262034	3.4997167940486905e-9	tRNA/rRNA methyltransferase SpoU family protein
ZT0	Medtr4g130530	2068.6664109878207	84.22	0.9231742763222481	0.07943092510776434	11.622353322333499	1.000834467608002e-29	translation initiation factor IF-3
ZT0	Medtr1g105495	49.932560774256835	2.42	0.9229971229810593	0.30242141662352895	3.0520230124113783	0.004811012623619523	xyloglucan endotransglucosylase/hydrolase family protein
ZT0	Medtr5g016170	19.806100755080216	3.31	0.9226691826662416	0.4047401919294332	2.2796579165211983	0.03879814852369345	hypothetical protein
ZT0	Medtr1g033550	33.41904305425064	1.23	0.922455206825831	0.27090960695157135	3.4050295122635945	0.0015589329654777894	nuclear ribonuclease Z
ZT0	Medtr8g061130	1542.273029803291	102.3	0.9215619521167684	0.07320666024923769	12.588498764719494	1.0439461144308146e-34	translation initiation factor IF-1
ZT0	Medtr1g086070	215.87544811239295	3.09	0.9209203435053476	0.13560146259728723	6.791374708400609	7.45901428302057e-11	isopenicillin N epimerase-like protein
ZT0	Medtr8g024630	7.077793102280215	0.17	0.9205522975107108	1.3706877392664911	0.6715988413256943	0.5763105147808264	transmembrane protein, putative
ZT0	Medtr2g029180	1325.2937184186133	18.34	0.9200951877123152	0.1504889341473226	6.114038835650063	5.2963545666887655e-9	triose-phosphate transporter family protein
ZT0	Medtr4g094625	1287.5242247658305	37.48	0.919814666054981	0.18582006797573536	4.950028681375209	2.7806960767521323e-6	thiamine monophosphate synthase
ZT0	Medtr5g083910	54.34983936745933	0.49	0.9188262001751503	0.3086246715362082	2.977163800941794	0.006021480210076264	LRR receptor-like kinase
ZT0	Medtr1g009315	160.91042046693246	0.76	0.9184668470078939	0.2011499550291524	4.566080300016879	1.6536092934931336e-5	DNA topoisomerase I, bacterial protein
ZT0	Medtr8g056800	28.581014712166507	4.59	0.916879295752657	0.32637733134437497	2.8092615745583682	0.00982165208511377	albumin I
ZT0	Medtr2g043230	3483.540585998615	131.83	0.916608540513039	0.13476178997235785	6.801694610178838	6.961645380288622e-11	GroES chaperonin
ZT0	Medtr5g022700	699.9059980057762	12.86	0.9155658855230553	0.13786479153307638	6.641042106123185	1.9968408315438007e-10	diaminopimelate decarboxylase
ZT0	Medtr4g052500	839.8051623034276	14.75	0.9147448652867629	0.08932071228185307	10.24112819880197	2.6207354761684618e-23	transmembrane protein, putative
ZT0	Medtr4g082470	9.424079099030548	0.1	0.9143886180887705	0.5607486873427828	1.6306567250683717	0.14897274507609515	PPR containing plant-like protein
ZT0	Medtr4g016510	563.2305559890507	11.87	0.9139576421863247	0.14457570645428972	6.32165434014524	1.5079784988941831e-9	GDSL-like lipase/acylhydrolase
ZT0	Medtr3g109700	122.95164617507271	6.91	0.9135692180446396	0.16572818577280454	5.512455312200451	1.599691837472154e-7	peptidyl-tRNA hydrolase II (PTH2) family protein
ZT0	Medtr7g066730	83.51693563619061	1.12	0.9135106339404708	0.1825384239734142	5.004484064536019	2.13687846122892e-6	DUF740 family protein
ZT0	Medtr1g116120	30681.23122365558	334.76	0.913502520052908	0.07919686823957074	11.534578833212954	2.696590659339238e-29	plastid transketolase
ZT0	Medtr8g099900	94.48666402151511	0.53	0.9133802008209306	0.29034469538619806	3.1458477297338265	0.0036152984856964916	tRNA nucleotidyltransferase/poly(A) polymerase
ZT0	Medtr2g100660	154.39810055214218	1.47	0.9133417725999913	0.1522060075705281	6.000694632087854	1.0348107622278496e-8	group IIA intron splicing facilitator CRS1
ZT0	Medtr5g059410	30679.5390247513	334.65	0.9133386462257027	0.07921752228079235	11.529502816161134	2.848207716400798e-29	plastid transketolase
ZT0	Medtr3g030950	2142.5193202939877	42.82	0.912094268230922	0.07892293070547352	11.556771398095913	2.1033642059386217e-29	PsaB RNA-binding protein
ZT0	Medtr8g107270	162.54159556147732	4.54	0.9120676032661256	0.1724458889480759	5.2890075189948575	5.16382624500174e-7	ADP/ATP carrier protein
ZT0	Medtr7g089300	34.79220830091403	2.81	0.9116122244322884	0.429953169005985	2.120259344848784	0.05582486770385581	GroES chaperonin
ZT0	Medtr4g084025	18.242897658034643	8.49	0.9106694567356738	0.3484479890996749	2.6135018287483165	0.01682201628875403	hypothetical protein
ZT0	Medtr4g050760	110.56178131622785	3.69	0.9095655852566671	0.18392920952156705	4.9451937928870064	2.846125327938525e-6	NADPH-dependent quinone oxidoreductase
ZT0	Medtr8g032325	109.4717301943183	22.11	0.9095320785808837	0.1737842531745208	5.233685227323196	6.843975094687378e-7	hypothetical protein
ZT0	Medtr1g008300	65.99421875305971	2.43	0.9093899198575655	0.21137401090251318	4.302278771049961	5.207782091945153e-5	rhomboid protease YdcA-like protein, putative
ZT0	Medtr1g116170	1431.08743529501	52.99	0.9089169156427556	0.09464272393073371	9.603663946823485	1.2835285530209283e-20	DnaJ/Hsp40 cysteine-rich domain protein
ZT0	Medtr8g020590	13158.240576656408	975.03	0.9082117407370877	0.15971068546450506	5.686605990673889	6.168927659753056e-8	auxin-binding protein ABP19a
ZT0	Medtr3g079520	1131.3286326364785	53.09	0.9081024774244906	0.07955996398722012	11.414063454960347	1.0490647896856959e-28	smad/FHA domain protein
ZT0	Medtr3g067705	194.30962256035713	11.28	0.9081013462574921	0.16566786993057128	5.481457247190192	1.8902202537291692e-7	transmembrane protein, putative
ZT0	Medtr5g043580	2883.869198431964	148.84	0.9061962281636393	0.07226872910772832	12.539257841559746	1.9140147160694919e-34	hypothetical protein
ZT0	Medtr4g087980	371.24568738245296	6	0.9060409116933895	0.10641765396979973	8.514009451387784	1.9490629503329846e-16	pectinesterase/pectinesterase inhibitor
ZT0	Medtr7g077740	160.4027091440338	1.95	0.9060347437331079	0.13774832533587872	6.577464673518734	3.007769388486692e-10	phosphatidylinositol N-acetyglucosaminlytransferase subunit P-like protein
ZT0	Medtr2g029830	2118.3169846627766	66.54	0.9058718577735135	0.1415185431794318	6.401082412394224	9.177671306454944e-10	peroxidase family protein
ZT0	Medtr3g479600	1131.7552576357907	53.09	0.9058619636329032	0.07945600108484513	11.400799829651644	1.218053517204639e-28	smad/FHA domain protein
ZT0	Medtr7g051020	784.155706369498	19.77	0.9055527058651582	0.15757902423273132	5.7466576549409965	4.4047600397879556e-8	2-hydroxyisoflavanone dehydratase
ZT0	Medtr4g121070	251.84796324845877	4.19	0.9054563593567918	0.13094023153161904	6.915035575892845	3.2521217911545797e-11	tyrosyl-tRNA synthetase
ZT0	Medtr1g052515	65.23479501640607	0.62	0.9051734680383638	0.25460328011961436	3.555230975866089	9.31812599052503e-4	galactinol-raffinose galactosyltransferase
ZT0	Medtr4g088030	438.1617957409502	9.82	0.9047551364091969	0.1431492204710181	6.320363697630984	1.519387150590209e-9	trichome birefringence-like protein
ZT0	Medtr3g110640	839.673999118091	120.84	0.9046958618737032	0.15055688173991028	6.008997074186098	9.861553382088518e-9	50S ribosomal protein
ZT0	Medtr4g115120	175.889260028144	3.79	0.9038322166148921	0.1342083660944479	6.734544521455753	1.0846937051118206e-10	receptor-like kinase
ZT0	Medtr7g102930	899.3702626203288	61.62	0.9038302814516879	0.08500945873346734	10.632114295486737	4.895512863453575e-25	hypothetical protein
ZT0	Medtr3g005660	184.6448443141666	4.55	0.903644641995886	0.22836920736674102	3.9569460892541066	2.110013079626959e-4	GDSL-like lipase/acylhydrolase
ZT0	Medtr4g132280	100.20390668501908	2.06	0.9035963232307623	0.23447493154760377	3.8537011921349538	3.1357944225651616e-4	glucan endo-1,3-beta-glucosidase-like protein
ZT0	Medtr4g045997	178.08647514287088	3.61	0.9028890969171699	0.130076434080349	6.941219624451342	2.721294448386461e-11	NAD(P)H dehydrogenase B2
ZT0	Medtr8g018290	176.68869639935582	2.89	0.9014552402292889	0.1370637795016354	6.576903420487781	3.0178110286749217e-10	phospholipid-transporting ATPase-like protein
ZT0	Medtr5g008070	324.42014557400915	6.05	0.900736076900613	0.14111692907461787	6.382905883845687	1.0282884648738844e-9	eukaryotic aspartyl protease family protein
ZT0	Medtr1g079760	2681.714714416353	48.97	0.9005600647859399	0.10105693005136321	8.911413243289907	6.6378563594734e-18	ammonium transporter 1 protein
ZT0	Medtr1g010150	84.3934507044795	3.39	0.9002312611194756	0.2620787401287116	3.434964853224477	0.0014088117920986575	CHY and CTCHY and RING-type zinc finger protein
ZT0	Medtr5g093390	36080.37293356385	706.65	0.8995492991099766	0.0828519140040757	10.857314642914893	4.5303445312399705e-26	GDP-L-galactose phosphorylase
ZT0	Medtr4g093620	1078.703202956591	24.74	0.8971839267550147	0.098699679194876	9.090038935016032	1.376024675682741e-18	fructose-1,6-bisphosphatase
ZT0	Medtr8g103470	795.2630583772927	29.5	0.8943268884119935	0.13127521764793101	6.812610212618365	6.476076702657941e-11	signal peptidase I family protein
ZT0	Medtr1g073190	137.18991919272048	12.06	0.8941267806420956	0.17439287229953507	5.127083285298234	1.167735278939494e-6	hypothetical protein
ZT0	Medtr2g030000	148.19651502448542	1.32	0.8938936603270273	0.18246753481845976	4.89891892942149	3.559833352655789e-6	glycoside hydrolase family 3 protein
ZT0	Medtr8g095060	70.5078592331666	1.96	0.8936728903523313	0.20197545946755788	4.424660761798523	3.080732991688313e-5	magnesium transporter NIPA2-like protein
ZT0	Medtr5g067460	52.42023510158269	1.37	0.8936605145725304	0.28126537227053405	3.1772859465720735	0.0032739168151019187	MATE efflux family protein
ZT0	Medtr6g034310	27.333291706545662	0.27	0.8935330099001841	0.32420957341803575	2.7560352412791427	0.011401017538115572	ABC transporter-like family-protein
ZT0	Medtr1g013040	89.10240923825893	1.77	0.8934400836867434	0.2433418508569018	3.67154305985835	6.157176768936423e-4	Serine/Threonine kinase family protein
ZT0	Medtr4g045767	336.34334482432513	6.26	0.8929565419047408	0.13798131147368603	6.471575986397504	5.895986573859669e-10	phototropic-responsive NPH3 family protein
ZT0	Medtr7g096120	5339.4260387266795	74.43	0.8916074996085891	0.08814591923000786	10.115130767222809	9.14355818761343e-23	phospholipase A1
ZT0	Medtr4g064917	12.62411732925031	0.42	0.8911123581873973	0.5629747785002795	1.5828637307007791	0.1621123550219361	PPR containing plant-like protein
ZT0	Medtr3g024510	60.10079974559197	1.86	0.8909875261627778	0.3002161890290148	2.967819720330495	0.00618829240970248	GDSL-like lipase/acylhydrolase
ZT0	Medtr4g100650	47.97065969825648	1.97	0.8903063778565399	0.2516833527004422	3.537406698949206	9.918820298079822e-4	ethylene response factor
ZT0	Medtr7g035310	664.4578192380328	25.39	0.8902509294457795	0.08758388896217907	10.164551266160519	5.600378180026711e-23	peptide deformylase 1A
ZT0	Medtr5g090910	40.12451119839729	1.88	0.8900094219445843	0.2823394274372055	3.1522675739027957	0.0035418877294317733	glutathione S-transferase
ZT0	Medtr2g015580	114.28035404904247	1.08	0.8899850982135157	0.2251769126948206	3.9523816521088073	2.1496344066975403e-4	GDSL-like lipase/acylhydrolase
ZT0	Medtr6g035100	4.729416821145453	0.03	0.8890983016032818	1.1459461772519788	0.7758639273402634	0.5143683873377263	cytochrome P450 family 71 protein
ZT0	Medtr2g451510	393.42252202299335	6.46	0.8883108726531924	0.09629565309111958	9.224828371148073	4.1304487613570065e-19	glycoside hydrolase family 79 amino-terminal domain protein
ZT0	Medtr5g010330	32.80137361486695	1.21	0.888040512029639	0.26155539049742516	3.3952292489203395	0.0016098432719876222	AT hook motif DNA-binding family protein
ZT0	Medtr1g100800	498.24912189048075	18.87	0.8874298554261202	0.10689263338848892	8.302067479251436	1.1097607987798374e-15	plant/K24M7-17 protein
ZT0	Medtr8g063940	722.4863658452073	17.2	0.8873954269956161	0.0678582050858688	13.077201583400157	2.1992614329737e-37	spermidine synthase
ZT0	Medtr8g085480	12.159747220745377	0.19	0.8872180086433237	0.4810496044316767	1.8443378821431604	0.09962724903126258	S-adenosyl-L-methionine-dependent methyltransferase superfamily protein
ZT0	Medtr6g008950	223.82561475070574	2.62	0.8866206200351968	0.1721719894049036	5.14962174218767	1.0434644237011839e-6	anti-virus transcriptional factor, putative
ZT0	Medtr3g058630	1231.478191865959	54.61	0.8854832058242025	0.16962034799861228	5.2203831454905805	7.330084531482162e-7	ZIP metal ion transporter family protein
ZT0	Medtr1g105545	349.39313623477545	9.59	0.8851751988546377	0.105007356476661	8.429649393672502	3.898251330595993e-16	pyruvate, phosphate dikinase regulatory protein, putative
ZT0	Medtr4g108780	58.084901591679355	0.9	0.8847214752097508	0.26923201479491965	3.286093133774094	0.0023141697527713366	galactoside 2-alpha-L-fucosyltransferase-like protein
ZT0	Medtr3g092220	257.11048437272507	29.47	0.8842672037850683	0.11923802889673857	7.415983071565644	9.824639619662043e-13	SAUR-like auxin-responsive family protein
ZT0	Medtr8g102490	7.4778462289312335	0.26	0.8835660586121475	0.525538219442457	1.681259375482761	0.13590540359242978	nucleotide-diphospho-sugar transferase superfamily protein
ZT0	Medtr6g033510	2497.529585086979	89.3	0.8834777091661009	0.09494097584257749	9.305546960366232	2.000828064166062e-19	shikimate kinase
ZT0	Medtr4g077880	76.73542442222785	0.31	0.8826315072345821	0.36592189463458386	2.4120762386082246	0.028132912426247044	P-loop nucleoside triphosphate hydrolase superfamily protein
ZT0	Medtr1g043240	234.33105743088737	4.05	0.8824817457711617	0.16760201836247568	5.265340801938337	5.822341163518284e-7	serine/threonine-protein phosphatase PP1
ZT0	Medtr3g031360	602.4833294993892	14.85	0.8816170834099581	0.09700737925971824	9.088144532279356	1.3988458409442255e-18	protein phosphatase 2C family protein
ZT0	Medtr4g059790	186.46632075710892	4.94	0.8815609810713889	0.22659516482411837	3.8904668674446365	2.732228149700044e-4	fasciclin-like arabinogalactan protein
ZT0	Medtr4g073650	108.79689757122689	4.56	0.8811458390124451	0.19414019296301024	4.538708989438013	1.8684178383690756e-5	peptidyl-prolyl cis-trans isomerase
ZT0	Medtr1g115295	788.1688958220253	9.99	0.8795786783399165	0.1204249200721284	7.303958996303204	2.1962904090899095e-12	methionyl-tRNA synthetase
ZT0	Medtr4g129300	94.78250946958025	14.47	0.8790329347306222	0.18357592134293135	4.788389067041823	5.989823498195528e-6	hypothetical protein
ZT0	Medtr2g029850	590.6563603679539	20.96	0.878795794735481	0.14951893607383265	5.87748828216334	2.0994583799742694e-8	peroxidase family protein
ZT0	Medtr2g436470	5.059953264045378	0.07	0.8786894436482617	0.8578948536433966	1.0242390893435862	0.3808256361808051	pentatricopeptide (PPR) repeat protein
ZT0	Medtr3g094300	816.369601034201	26.47	0.8783545136374862	0.07911515972837775	11.102227647053969	3.282902241146604e-27	dual specificity phosphatase domain protein
ZT0	Medtr3g025880	49.61666721011469	0.54	0.8780668783040022	0.2976227485849593	2.950268023794389	0.0065208226051557214	RNA-binding (RRM/RBD/RNP motif) family protein
ZT0	Medtr7g077120	519.6591896615103	13.98	0.8761548239324295	0.1187422567961838	7.378627015960403	1.2908358974150558e-12	AT hook motif DNA-binding family protein
ZT0	Medtr4g019910	531.4744101600223	15.75	0.875944065265897	0.1169315558852393	7.491083639779658	5.701859328162924e-13	SnoaL-like domain protein
ZT0	Medtr7g116630	3320.307967558576	48.66	0.8750227584499709	0.06750778696538948	12.96180481962156	9.665596211111067e-37	violaxanthin de-epoxidase
ZT0	Medtr7g078070	2345.842943879634	63.05	0.8747014603818745	0.073891326496595	11.83767435034722	8.42147260139169e-31	cysteine synthase/L-3-cyanoalanine synthase
ZT0	Medtr3g064140	996.8870971306847	24.07	0.874530761180543	0.0846203767061609	10.33475381724307	1.015783713215732e-23	class I glutamine amidotransferase superfamily protein
ZT0	Medtr7g070530	99.75245800757179	0.89	0.874523010053381	0.22513130256939345	3.884502066449964	2.79376484313969e-4	methyltransferase domain protein
ZT0	Medtr6g088795	163.39244623926578	3.22	0.8743662811194625	0.1409236671594118	6.204538235088545	3.0779847382454885e-9	hexokinase
ZT0	Medtr2g018740	1028.4441873333176	10.62	0.8733387411155089	0.1116763520283318	7.820265662814153	4.904893753244001e-14	plastid transcriptionally active protein
ZT0	Medtr1g084790	440.8973974867422	3.31	0.8732478518849544	0.1562946809959716	5.587188548709868	1.0676014130959333e-7	LRR receptor-like kinase
ZT0	Medtr2g061490	75.24193303868266	8.41	0.8730119818656951	0.17863967649057932	4.886999344245532	3.7656156203107725e-6	transmembrane protein, putative
ZT0	Medtr7g117750	357.34969237521335	14.25	0.8727027031690009	0.10864306816583358	8.032750896144622	9.523766797834197e-15	lecithin retinol acyltransferase
ZT0	Medtr2g061510	74.64906318184894	8.41	0.8725111411830245	0.1800902444084417	4.844855111663815	4.606072655603729e-6	transmembrane protein, putative
ZT0	Medtr4g085570	155.84266988656657	1.81	0.8720817002269141	0.12568346319857082	6.938714752386222	2.7679398707713634e-11	filament-plant-like protein, putative
ZT0	Medtr1g096230	1688.9142152289846	42.31	0.8720687801155089	0.08359359498851783	10.432244004283985	3.797786579004689e-24	TPR protein
ZT0	Medtr1g041575	137.39064764877747	54.97	0.8716479801012142	0.18899684620507118	4.611971033397202	1.3462875941480037e-5	hypothetical protein
ZT0	Medtr3g048950	1528.3254100574927	21.44	0.8715549201477585	0.07784818919468117	11.195570881786237	1.17659579781073e-27	aspartyl/glutamyl-tRNA(Asn/Gln) amidotransferase subunit A
ZT0	Medtr7g085420	471.09028816663897	16.85	0.8712714544562788	0.10206635803997993	8.536323536840584	1.6204882403579933e-16	HNH endonuclease domain protein
ZT0	Medtr0022s0280	178.01413017470918	5.68	0.8712033834986905	0.11637631259664827	7.486088569571862	5.912629170543658e-13	hypothetical protein
ZT0	Medtr3g118070	5478.792995518812	103.78	0.871041101943799	0.08110867985585342	10.739184801081905	1.5904317694390062e-25	glutamate-1-semialdehyde 2,1-aminomutase
ZT0	Medtr4g093560	1114.1838300429097	64.37	0.8708901493378346	0.06831268248022054	12.748586612595615	1.4316776887552407e-35	magnesium-dependent phosphatase-like protein
ZT0	Medtr8g068150	11.98242332698741	0.19	0.8706304732617232	0.4946670065630353	1.7600334400931568	0.11729505312520151	SLOW growth protein, putative
ZT0	Medtr7g070740	168.96794050111185	1.94	0.8700859174470014	0.30782310819906683	2.826577648888931	0.009350058424953211	UDP-glucosyltransferase family protein
ZT0	Medtr2g074840	1079.8679808840686	9.7	0.8696418435613129	0.09127399408795935	9.527816244386681	2.603725859968826e-20	LRR receptor-like kinase
ZT0	Medtr1g023160	516.9213321319637	8.36	0.869037015148192	0.11078677244393006	7.844230822664479	4.092116803376286e-14	GTP-binding protein Obg2, putative
ZT0	Medtr3g435310	19.411073050811638	0.35	0.8690101673558543	0.4601550249369802	1.8885160875399944	0.09122470888964519	UDP-glucosyltransferase family protein
ZT0	Medtr5g031830	312.9616909256833	4.71	0.8689144372004515	0.1938118685298479	4.4832880658525545	2.3806712709050423e-5	UDP-glucosyltransferase family protein
ZT0	Medtr2g087960	356.44911486724317	3.03	0.8687463021465367	0.21810172315158022	3.9832161323308752	1.903635027127024e-4	cellulose synthase H1-like protein
ZT0	Medtr1g007600	4.9560187572452925	0.07	0.8686575810678292	0.7190054081940965	1.2081377569184206	0.2950522545702602	pentatricopeptide (PPR) repeat protein
ZT0	Medtr4g103610	221.0921596730051	2.17	0.8684097883947467	0.1357554519659807	6.396868603202497	9.424624759350599e-10	oligomeric subunit-like protein
ZT0	Medtr7g117620	367.70451527709344	6.31	0.8681155543870311	0.10249708063932063	8.469661272030402	2.8171136326527736e-16	ankyrin repeat protein
ZT0	Medtr4g132320	369.5835441615842	6.01	0.867932820052458	0.11353090199854268	7.6449037642949325	1.8356193660111967e-13	multi-copper oxidase-like protein
ZT0	Medtr7g075453	1720.991928160073	53	0.867437059125912	0.1230611055665976	7.048832002053456	1.308969861295152e-11	fasciclin-like arabinogalactan protein
ZT0	Medtr7g080960	33.62062153995111	0.81	0.8666107524434707	0.33250819237151874	2.606283912172568	0.017151390590570623	UDP-glucosyltransferase family protein
ZT0	Medtr3g465590	54.451776818015055	0.76	0.866488689948892	0.2876002630791907	3.0128230088242463	0.0054215817890097264	Serine/Threonine-kinase DDB-G0267514-like protein, putative
ZT0	Medtr1g018840	6125.9951062330165	145.72	0.8660557759496513	0.11357491082254385	7.625414536339174	2.1236518927724271e-13	papain family cysteine protease
ZT0	Medtr8g093330	1068.521037959039	31.62	0.8649896676514353	0.08593679716498222	10.065416633934129	1.4970361634353041e-22	uridylate kinase
ZT0	Medtr7g405770	781.1969350357664	36.73	0.8644117257614747	0.10224928823819715	8.453963256426439	3.198761505836578e-16	Lipid transfer protein
ZT0	Medtr4g127810	655.3601832995407	46.75	0.8637828667967246	0.11163508217073691	7.737557495372628	9.178911711739883e-14	hydroxyproline-rich glycoprotein family protein
ZT0	Medtr0049s0070	259.6058992654479	4.01	0.8632040337716247	0.1178402244938409	7.325206969685817	1.892070785118878e-12	NSP-interacting kinase-like protein
ZT0	Medtr2g069310	1097.2704293594652	4.42	0.8625613983796804	0.18330863507914175	4.705514271094091	8.794547909766532e-6	translation elongation factor EF-2 subunit
ZT0	Medtr2g101710	16.41013386971452	0.16	0.861811376128137	0.4488814765658655	1.9199085306913555	0.08554492809761617	PPR containing plant protein
ZT0	Medtr0102s0060	995.3053202312059	8.92	0.8615602519094189	0.09095832945887497	9.47203249042691	4.372219125803449e-20	indole-3-acetic acid-amido synthetase
ZT0	Medtr1g111140	571.2664614171697	12.05	0.8613920626193606	0.1281953707642562	6.719369486464612	1.199992849714841e-10	2-oxoacid dehydrogenase acyltransferase family protein
ZT0	Medtr3g033020	36.32322920368736	4.12	0.8610025040275394	0.28921368780370077	2.9770461784365176	0.006022480980913334	hypothetical protein
ZT0	Medtr4g058005	30.977294405270353	0.49	0.8609645877634929	0.34915626759081664	2.465843141537058	0.02461061917644161	arsenical pump-driving ATPase-like protein
ZT0	Medtr1g087840	77.514802359277	1.84	0.8607379098247455	0.19890979988225502	4.327277541550294	4.681924399256491e-5	substrate carrier family protein
ZT0	Medtr8g467070	47.96954424949967	1.09	0.8604789435787263	0.30563628156315886	2.815369102051161	0.009650273862748414	transmembrane amino acid transporter family protein
ZT0	Medtr5g099370	55.40998125903892	0.59	0.859419750741758	0.2788871321060625	3.081604175322494	0.0044021139706562	queuine tRNA-ribosyltransferase
ZT0	Medtr7g088590	172.27523848293447	7.33	0.8593997289385042	0.1559457656492583	5.510888515379139	1.6134876520257817e-7	peroxisomal membrane 22 kDa (Mpv17/PMP22) family protein
ZT0	Medtr3g100280	590.5933926936525	5.7	0.8589778547856874	0.0890466681173459	9.646378387271318	8.576595828785449e-21	mechanosensitive ion channel-like protein
ZT0	Medtr2g087590	1045.0504714301787	23.29	0.8587287661745585	0.08263766384878972	10.391493735179388	5.7450796628996025e-24	outer membrane OMP85 family protein
ZT0	Medtr2g016280	169.0412119711593	2.56	0.8584297909404706	0.16340742391289917	5.2533096133871995	6.19251970052081e-7	CBL-interacting kinase
ZT0	Medtr3g106250	192.87492971497352	6.62	0.8582107092758761	0.1532122865065357	5.6014483488520135	9.87373087782608e-8	DUF868 family protein
ZT0	Medtr6g093190	164.4047102929929	60.36	0.8570894865774691	0.1895511829349506	4.521678384205081	2.0150193460474493e-5	hypothetical protein
ZT0	Medtr6g088500	763.2515600172517	5.36	0.8562550402242728	0.21132780918404145	4.051785912750254	1.4514778706698522e-4	short-chain dehydrogenase/reductase
ZT0	Medtr4g105140	47.20005296247031	0.98	0.855769912645554	0.2803486735268032	3.0525199277025887	0.004804122706541434	S-adenosylmethionine-dependent methyltransferase, putative
ZT0	Medtr1g070840	617.3214819352118	17.82	0.8553989243672889	0.11725288592681443	7.295333650902222	2.3359011585933787e-12	single-stranded DNA-binding protein
ZT0	Medtr8g080080	804.8028497229463	10.79	0.8549900742160426	0.09781436793214678	8.740945653394641	2.8767922620428475e-17	ankyrin repeat protein
ZT0	Medtr5g022580	1208.7345563911001	21.72	0.8548698173739874	0.07069191307838844	12.092894082892398	4.203982766969227e-32	3-dehydroquinate synthase
ZT0	Medtr2g104640	63.67590215455535	1	0.8545571090514201	0.22628858372541286	3.776403983721831	4.1980032908718883e-4	PPR containing plant-like protein
ZT0	Medtr4g104510	1459.323323602458	25.94	0.8545346149453458	0.14430460637254366	5.921741768514571	1.6326665492502642e-8	transmembrane amino acid transporter family protein
ZT0	Medtr7g115180	451.3420460120597	29.18	0.8544363190131951	0.12396128745297863	6.892767383827813	3.781335742160009e-11	twin arginine translocase
ZT0	Medtr0004s0440	1594.154730859544	82.71	0.8530276134414784	0.07241475027527311	11.7797494322473	1.6555310870779712e-30	peroxisomal biogenesis factor 11 family protein
ZT0	Medtr8g009660	1324.7781113988979	31.42	0.8528466321293435	0.08283659416879482	10.295529900607832	1.5126965370391188e-23	ribose-phosphate pyrophosphokinase
ZT0	Medtr7g084160	1568.9774840208318	50.93	0.8527166222806758	0.09162286004277863	9.306810788077813	1.9792519336527366e-19	cofactor assembly of complex protein C, putative
ZT0	Medtr8g070840	2239.6810409035743	24.29	0.8526085056938086	0.09377668742290304	9.091902573278318	1.3546155807497107e-18	WEAK movement UNDER BLUE LIGHT-like protein
ZT0	Medtr2g075860	163.5974560404302	3.52	0.85258822850351	0.13880216677979054	6.14247059886421	4.4647175513584795e-9	NHL repeat protein
ZT0	Medtr6g032915	155.2054489714832	1.44	0.8525681550504122	0.14494893661075153	5.8818517402436274	2.0480939904984665e-8	pentatricopeptide (PPR) repeat protein
ZT0	Medtr8g032340	479.34866111931825	10.45	0.8525132361721899	0.09165960163702125	9.300861240355427	2.0855250020559167e-19	signal recognition particle receptor FtsY
ZT0	Medtr0023s0210	32.44992646743043	6.44	0.8524241636839469	0.33780330804655834	2.523433440049261	0.02125917912509611	myb transcription factor
ZT0	Medtr3g095490	1544.4145586897364	22.84	0.8520996958119662	0.08242146726293725	10.338322334078768	9.807998574854175e-24	carbamoylphosphate synthase small subunit
ZT0	Medtr3g087980	98.41841880644189	1.38	0.8519966567559122	0.22896248742655909	3.7211189760034142	5.149387266128753e-4	bacterial long-chain fatty acid CoA synthetase
ZT0	Medtr5g087440	84.19710208681248	2.14	0.8519097297134841	0.1870278911652394	4.554987624604186	1.7372418822052884e-5	hypothetical protein
ZT0	Medtr7g014610	383.7812627387142	5.58	0.8517966992337048	0.11306408361761355	7.533751408754253	4.1777992719065343e-13	HXXXD-type acyl-transferase family protein
ZT0	Medtr5g093830	3042.299657549775	41.72	0.8515172390843242	0.15153100924765234	5.619425643055411	8.953357195836952e-8	trigger factor-like protein
ZT0	Medtr0031s0060	33.01448188034238	0.45	0.8509307761261836	0.29158608411707965	2.918283218840142	0.0071704009171485944	amino acid permease
ZT0	Medtr3g462790	171.63730965256062	6.44	0.8508533001199137	0.15339822493118374	5.5466958662762655	1.329948833340016e-7	MYB transcription factor MYB51
ZT0	Medtr2g437990	100.71287793413754	2.08	0.8504303150167084	0.19292859795849168	4.408005469462217	3.3114572655892664e-5	mTERF protein
ZT0	Medtr5g017260	549.5233114426159	5.6	0.8495558895737919	0.13032403323846053	6.518796790299731	4.3803838236353123e-10	triacylglycerol lipase-like protein
ZT0	Medtr4g108710	241.60090146918444	11.21	0.8494352528211715	0.12766302777526717	6.653729491019773	1.8431563855574077e-10	HNH endonuclease domain protein
ZT0	Medtr6g007180	1787.22474487877	44.29	0.8487260373787342	0.06726894443655836	12.616907318639013	7.336449067330041e-35	calcium homeostasis regulator CHoR1, putative
ZT0	Medtr5g038520	421.992037879177	32.13	0.8486923092947933	0.1272854473620819	6.667630329181034	1.6844135024401927e-10	SecE/sec61-gamma subunit of protein translocation complex protein
ZT0	Medtr3g434800	12.359360836955169	0.13	0.8486004888024973	0.5273607294817464	1.6091461524570536	0.1547497906347737	pentatricopeptide (PPR) repeat protein
ZT0	Medtr7g094460	335.4122068353671	3.58	0.8484373985657215	0.20201282377551727	4.199918513631247	7.961804554645984e-5	GTP-binding elongation factor Tu family protein
ZT0	Medtr2g090885	74.09540528249508	2.01	0.8482646924010098	0.1971814151477544	4.301950524928415	5.2143795080351185e-5	PPR containing plant-like protein
ZT0	Medtr7g065220	278.79122792808886	3.57	0.8465531525984068	0.12374384308613379	6.841173924177792	5.350404840663432e-11	RHO guanyl-nucleotide exchange factor
ZT0	Medtr4g108080	1037.636526662025	71.41	0.8459573118361932	0.08960266578198206	9.441206960232028	5.793071244016145e-20	ubiquitin-conjugating enzyme
ZT0	Medtr0227s0030	42.74281330012165	0.71	0.8459323364540422	0.3137661035327565	2.69606030393187	0.013459678542042107	transmembrane protein, putative
ZT0	Medtr4g084630	527.2506216885675	11.18	0.8457395472108066	0.15072369421362775	5.611191734805148	9.363985275825428e-8	transcription termination factor family protein
ZT0	Medtr1g031590	133.9368637856719	2.48	0.8454707079907752	0.15253253719137183	5.542887593418987	1.356822912858087e-7	O-fucosyltransferase family protein
ZT0	Medtr6g009400	499.43021072415263	11.61	0.8452319671155939	0.096676831183639525	8.742859656933307	2.8321578144312655e-17	rRNA methyltransferase YlbH-like protein, putative
ZT0	Medtr3g087360	94.7730373664936	1.73	0.8445538973929996	0.20211147095666834	4.178653954648955	8.692140190634886e-5	transmembrane protein, putative
ZT0	Medtr1g083890	8.444238616566043	0.16	0.8445317899095822	0.6011675353266008	1.404819356139661	0.21863080808447505	PPR containing plant-like protein
ZT0	Medtr4g109520	400.9195777066115	14.09	0.8434737397788938	0.11529999517256655	7.315470729348152	2.026573651949223e-12	hypothetical protein
ZT0	Medtr0004s0220	635.9667093152415	24.49	0.8429054504217016	0.10565658785086088	7.9777841360114845	1.464091321187644e-14	riboflavin synthase alpha chain
ZT0	Medtr4g019640	23.953774116022355	0.83	0.8415137852823729	0.751145308484391	1.1203075833360674	0.3342792085368258	hypothetical protein
ZT0	Medtr4g134680	275.83223169906915	3.09	0.8413117933922193	0.13150655159017227	6.397489579181483	9.388342742097911e-10	dynamin-2B-like protein
ZT0	Medtr5g094610	295.9779855385176	3.22	0.8408418368053784	0.1834568079255198	4.58332316098482	1.5301966402075753e-5	transcription termination factor family protein
ZT0	Medtr6g021510	468.7016940404577	14.29	0.8406883188928868	0.09592934331299846	8.763620075557977	2.3716201721349636e-17	membrane protein
ZT0	Medtr2g461260	855.1760123694554	32.62	0.8398975434297468	0.09175523177758324	9.153674696890063	7.823559004499472e-19	peptidyl-prolyl cis-trans isomerase
ZT0	Medtr6g065100	8.820241762766845	0.03	0.8393712488952013	1.301752378258824	0.6448010104793611	0.5925783766003615	PPR containing plant-like protein
ZT0	Medtr4g131290	2.255236049320621	0.57	0.8381568929714157	1.1571469971792294	0.724330525866278	0.5447296261615091	MATE family efflux protein
ZT0	Medtr2g019790	923.6788739471699	12.76	0.83812375989265	0.10798365879301024	7.761579569175532	7.65766257385169e-14	Obg family GTPase CgtA
ZT0	Medtr5g022350	1146.9608697441874	24.11	0.8375403387697676	0.09873704818415535	8.482533701105421	2.537446817020799e-16	pathogenesis-related thaumatin family protein
ZT0	Medtr1g022015	158.40402588106195	5.97	0.8364834281214877	0.1926342759645953	4.34233951321948	4.392611070113751e-5	PPPDE thiol peptidase family protein, putative
ZT0	Medtr1g008380	95.60161820624434	2.34	0.8359373125217068	0.18170901721328397	4.600417333942825	1.4184693408871737e-5	indole-3-pyruvate monooxygenase
ZT0	Medtr4g015180	490.76224219128176	9.91	0.8353851721455696	0.13675234925086552	6.108744578954883	5.463559673967443e-9	anthocyanin 5-aromatic acyltransferase
ZT0	Medtr2g012380	113.4491717772212	3.54	0.8346703856141022	0.18750876171669936	4.4513673813023065	2.7433995049985954e-5	NADPH-dependent quinone oxidoreductase
ZT0	Medtr5g078140	4.173894263806606	0.08	0.8346561095854022	1.0990050818905064	0.7594651956928428	0.5238766653633485	myb transcription factor
ZT0	Medtr4g078150	2098.6161603076343	35.03	0.8345910437253224	0.10709608027191403	7.792918672712563	6.045562464447218e-14	pfkB family carbohydrate kinase
ZT0	Medtr0004s0610	46.686861901626926	1.31	0.8334422502439225	0.25119483850673296	3.3179115271573667	0.00208244965385294	PPR containing plant-like protein
ZT0	Medtr2g035620	221.90722628493666	1.87	0.8331472295772502	0.15745463557887648	5.291347736535119	5.104179523074882e-7	PPR containing plant protein
ZT0	Medtr2g093280	933.1691488780333	3.71	0.8331132295360852	0.13955181722205384	5.969920321499228	1.2365737142489699e-8	carbamoyl-phosphate synthase large chain
ZT0	Medtr2g099125	249.33433050939024	5.64	0.8330666212172282	0.11837898632605474	7.037284631942093	1.4160023088835855e-11	RNA-binding ASCH domain protein
ZT0	Medtr1g016230	71849.82024124594	520.97	0.8330127715461252	0.08472242075114368	9.832258853803824	1.472678642964296e-21	glycine dehydrogenase [decarboxylating] protein
ZT0	Medtr4g084000	6.983143950246782	1.81	0.8330052851835613	0.6838200366642853	1.2181644884917537	0.29102433362143076	hypothetical protein
ZT0	Medtr6g011530	25.148259838889523	0.2	0.8329122074040759	0.7084608017698876	1.1756644902911804	0.3091139450538193	2-aminoethanethiol dioxygenase-like protein
ZT0	Medtr8g098230	210.91478638010014	2.07	0.8328491871824393	0.13457004196395403	6.188964312023671	3.376737228010146e-9	P-loop nucleoside triphosphate hydrolase superfamily protein
ZT0	Medtr7g073990	1159.9009457527652	34.65	0.8327639858650945	0.09212430503392507	9.039568717054923	2.1546775266878797e-18	acetyltransferase NSI-like protein
ZT0	Medtr1g064560	52.274641546403004	0.72	0.8327167213266405	0.23507443329306935	3.5423534140290167	9.745534862069759e-4	Serine/Threonine-kinase CCR1-like protein
ZT0	Medtr8g015450	57.92149836755231	2.69	0.8321358654437516	0.23735393241571892	3.5058861548006224	0.0011049416903800419	transcription factor
ZT0	Medtr5g044710	15.628342072308978	0.7	0.8311678353081388	0.420465673226606	1.9767792907560107	0.07607722056680694	ureide permease-like protein
ZT0	Medtr4g015260	294.16762763850403	5.28	0.8306213472187224	0.12539839926430532	6.623859252525235	2.2284377969609375e-10	group 1 family glycosyltransferase
ZT0	Medtr1g086180	301.70214936560546	43.57	0.8305276084030163	0.14977069416804895	5.5453278961979695	1.3399603064917352e-7	MYB family transcription factor
ZT0	Medtr8g032030	135.09092428603435	3.24	0.8298337395388663	0.18996474038018643	4.36835666386339	3.933714403928539e-5	short-chain dehydrogenase/reductase
ZT0	Medtr3g064040	1100.014071377822	69.75	0.8293206456464471	0.06630257452492774	12.508121314876663	2.8007562940415e-34	transmembrane protein, putative
ZT0	Medtr3g025840	207.3954732009425	5.4	0.8292351666579136	0.13280232578789666	6.2441313564215335	2.424968223017847e-9	phosphoserine phosphatase
ZT0	Medtr4g077250	97.03028633116841	2.17	0.8290681316867081	0.22187568090706855	3.736633633291063	4.86007490171372e-4	transmembrane protein, putative
ZT0	Medtr4g015930	187.75902200885352	1.64	0.8288790380723523	0.15880114149990457	5.219603777677193	7.353316848086681e-7	leucine-rich receptor-like kinase family protein, putative
ZT0	Medtr1g072140	116.85377618562741	2.38	0.8287487414912325	0.17579834026339958	4.714201170781896	8.447520662400444e-6	transducin/WD40 repeat protein
ZT0	Medtr3g116320	153.38464768215127	2.12	0.8284253679313326	0.18215586944169304	4.547892804500084	1.794124298450171e-5	dehydration-responsive RD22-like protein
ZT0	Medtr2g021220	366.6862518320418	7.9	0.8272136133496777	0.12795901950149857	6.464676085924446	6.155648807826346e-10	cobalt ion transmembrane transporters protein
ZT0	Medtr5g007240	62.14610543239735	2.93	0.8271601035513637	0.270280373191505	3.0603779837364886	0.004692711512608974	50S ribosomal protein L14p
ZT0	Medtr7g097060	290.06182791896595	7.7	0.8266175062293916	0.11060184179567459	7.4738132096975525	6.463222605646177e-13	arabinose 5-phosphate isomerase, putative
ZT0	Medtr4g068510	166.885805310407	6.46	0.825459148320217	0.1574285960214077	5.243387600356724	6.512416554926223e-7	cold acclimation protein WCOR413
ZT0	Medtr1g084610	215.8551152231206	1.9	0.8253970786386061	0.14996936047825604	5.503771410416062	1.6771115528280865e-7	neutral/alkaline invertase
ZT0	Medtr5g013170	5.425105581110084	0.44	0.825099136156258	0.7522168675174185	1.096889968553054	0.34529783486885474	transmembrane protein, putative
ZT0	Medtr5g038560	272.8510324121549	9.82	0.8250423606474991	0.12526917500889398	6.586156255830072	2.841947784808917e-10	single-stranded DNA-binding protein WHY3
ZT0	Medtr1g104933	370.92828525970253	8.67	0.8247488630196521	0.10192197173309395	8.091963381354573	5.9667822480461926e-15	2-hydroxyisoflavanone dehydratase
ZT0	Medtr1g016360	704.9728317507776	34.64	0.8243551334813549	0.08489064630031386	9.71078875480663	4.6956180202132486e-21	DUF1230 family protein
ZT0	Medtr6g014170	764.0439651615746	6.42	0.8228980176409239	0.17143441965959927	4.800074683222149	5.67476823718751e-6	UDP-glucosyltransferase family protein
ZT0	Medtr8g099770	364.72572764444766	4.64	0.8224239682824316	0.12395382092191042	6.634922281262712	2.0749453222632412e-10	cyclin-dependent kinase C
ZT0	Medtr7g083120	80.12412958443521	3.82	0.8218480325070254	0.2143195439346484	3.8346854300773816	3.3729912554580747e-4	plant integral membrane protein
ZT0	Medtr6g018550	7.999748426822954	0.51	0.8217616520722527	0.5415172470087471	1.5175170442151749	0.18135478420216156	neoxanthin synthase
ZT0	Medtr8g061030	37.919801461944665	1.38	0.821536150968647	0.28350888240652244	2.8977439577736015	0.0076147711904576134	histone mRNA exonuclease
ZT0	Medtr4g126350	1040.325090833756	18.37	0.8211771049813846	0.14572958376482908	5.634937558777071	8.217252617442125e-8	GATA type zinc finger transcription factor family protein
ZT0	Medtr0038s0080	21.109917659950302	0.19	0.8211735319820763	0.3526319198165311	2.328698809822208	0.03450451697347329	disease resistance protein (TIR-NBS-LRR class)
ZT0	Medtr8g087440	267.74249834475535	10.13	0.8203074936587831	0.14781089130023045	5.549709405327861	1.309112568655689e-7	39S ribosomal protein L46
ZT0	Medtr7g099970	54.47194335468261	1.51	0.8195904427326989	0.31621717169613756	2.5918593804901513	0.017825466239800913	hypothetical protein
ZT0	Medtr5g075440	43.588538792911486	1.72	0.8189356431827168	0.36318910563913037	2.254846388471857	0.04116547667950776	UDP-glucosyltransferase family protein
ZT0	Medtr1g100753	376.67943959507323	19.09	0.8184278120528847	0.1089538424297842	7.511692968334955	4.916721520814314e-13	3-hexulose-6-phosphate isomerase, putative
ZT0	Medtr4g055030	627.8479414386893	32.99	0.8181968732145325	0.08546037194046473	9.573991484433542	1.6933905920975726e-20	Low molecular weight tyrosine-phosphatase, putative
ZT0	Medtr5g041290	53.12669552658563	3.04	0.8177956851085761	0.24013072815914785	3.405626974014662	0.0015557825312486403	50S ribosomal L18-like protein
ZT0	Medtr4g065040	166.57874573884575	3.11	0.8172055950283617	0.145458144308575	5.618149460883683	9.016772330204561e-8	NAD-dependent aldehyde dehydrogenase family protein
ZT0	Medtr3g096330	108.84761323266898	1.13	0.8168885145529758	0.1643620740352821	4.9700547972984435	2.5228826576110658e-6	glycoside hydrolase family 28 protein
ZT0	Medtr7g100590	45.53219784287297	0.88	0.8167664539225999	0.2741411736503968	2.979364402095233	0.005985107356480171	AP2 domain transcription factor
ZT0	Medtr2g058580	278.43027575323686	2.79	0.8162604359734633	0.11584408986563918	7.046198359538206	1.3326175229518665e-11	PPR containing plant-like protein
ZT0	Medtr8g006090	709.6449221691532	18.19	0.816202129400675	0.07299201259886805	11.18207459062901	1.3608539803505581e-27	nodulin MtN21/EamA-like transporter family protein
ZT0	Medtr1g092860	198.36486963358567	7.04	0.8156324928560843	0.15536643653992688	5.249734183396031	6.30751151395233e-7	RNA-binding (RRM/RBD/RNP motif) family protein, putative
ZT0	Medtr7g090640	350.1807069984241	3.87	0.815568006584047	0.12271699117721498	6.645925708904397	1.9356444679605354e-10	P-loop nucleoside triphosphate hydrolase superfamily protein
ZT0	Medtr7g094890	1036.3443113683143	21.97	0.8140498342988082	0.07435060811942298	10.948798602847605	1.7178484867787795e-26	ribosome biogenesis GTPase A
ZT0	Medtr1g073580	8.717326986421003	0.36	0.813867200684373	0.61284381599659	1.3280173176927375	0.2465303734558525	serine transhydroxymethyltransferase
ZT0	Medtr6g092560	74.3519436931426	1.88	0.8135984495656491	0.1985645384267523	4.0974005530487725	1.2088576941683575e-4	F-box protein interaction domain protein
ZT0	Medtr5g090130	60.00394995098624	1.85	0.8135779459839979	0.22022551246819835	3.694294711206462	5.679155048716612e-4	N-acetyl-D-glucosamine kinase-like protein
ZT0	Medtr2g010330	962.8035074556333	12.92	0.8135595084798556	0.10175196284528659	7.995516604597292	1.2737194200254972e-14	cytochrome P450 family protein
ZT0	Medtr3g030975	400.8691369187607	14.71	0.8133543227063892	0.16460309064418824	4.941306505991216	2.8996698469218476e-6	PsaB RNA-binding protein
ZT0	Medtr2g026685	1400.3557582250103	75.45	0.8132986772973936	0.10376455409503572	7.8379238882722015	4.2990089164630997e-14	heavy metal transport/detoxification superfamily protein
ZT0	Medtr4g094942	202.6477289455653	5.73	0.8131695659408457	0.16765226899967617	4.850334390299342	4.488062643993153e-6	carboxy-terminal domain cyclin
ZT0	Medtr8g077125	764.0218972459791	13.98	0.8129856968717012	0.09431461604572104	8.619933271822777	8.042557551656403e-17	GTP-binding protein Era protein
ZT0	Medtr8g017080	125.88807348998802	0.69	0.8128692042314347	0.23495783997894223	3.4596385645368843	0.0012945706564784366	TCP-1/cpn60 chaperonin family protein
ZT0	Medtr3g083820	310.09253107342187	3.98	0.8127653387599014	0.14969537241919362	5.429462017596013	2.491742299316679e-7	purple acid phosphatase superfamily protein
ZT0	Medtr4g106970	856.4636007457175	31.12	0.8120731954353765	0.09081318563172197	8.942238836644346	5.0708837098401756e-18	phosphoglycerate mutase
ZT0	Medtr4g055520	865.7544669776253	9.35	0.8118240046644727	0.10699061506007354	7.587805754819208	2.813025647643391e-13	cellulose synthase-like protein A1
ZT0	Medtr3g103070	234.4718395558135	2.33	0.8115258902198194	0.1350234295817883	6.010259795158368	9.78866959298755e-9	calcium-transporting ATPase 2, plasma membrane-type protein
ZT0	Medtr6g453040	476.8584663621409	11.88	0.8114654731369996	0.14084816239895143	5.761278381740824	4.060597761416988e-8	rossmann-fold NAD(P)-binding domain protein
ZT0	Medtr2g019810	60.04226828719166	1.01	0.8111871147196689	0.26262701632280094	3.088742072607717	0.004306751281359498	transcription termination factor family protein
ZT0	Medtr1g115475	34.95818487512198	0.41	0.8111785886925515	0.5419534909337721	1.49676790031357	0.18774189905879823	glycoside hydrolase family 20 domain protein
ZT0	Medtr6g069630	464.6287331780695	13.91	0.8103044404636897	0.11515096868008699	7.036887746162879	1.4193214748276368e-11	aldose 1-epimerase family protein
ZT0	Medtr1g067280	5.660857603624109	0.08	0.810039113803954	0.660187378002446	1.2269836425151297	0.287255496906468	PPR containing plant-like protein
ZT0	Medtr0007s0080	85.63931368567263	2.27	0.8098900982948233	0.25220950600238695	3.2111799080529435	0.002939091025603514	disease resistance protein (TIR-NBS-LRR class), putative
ZT0	Medtr1g083380	179.4835572892156	8.73	0.8088744591570239	0.17577667233461752	4.601716760328747	1.4103114942097836e-5	translationally-controlled tumor-like protein
ZT0	Medtr3g078700	315.3394838123154	2.9	0.8080171978135297	0.1814432623314448	4.453277500806362	2.721241544608116e-5	L-ascorbate oxidase
ZT0	Medtr8g083210	1696.9281139910083	13.57	0.8079061031755026	0.07999422554104342	10.099555283037052	1.0689755809963545e-22	aspartokinase-homoserine dehydrogenase
ZT0	Medtr2g089140	338.1652872310766	7.48	0.8073280485398349	0.23477405791610365	3.438744705040337	0.001390678290764034	xyloglucan endotransglucosylase/hydrolase family protein
ZT0	Medtr5g064035	30.672003848243914	0.63	0.8065383016334379	0.32872083003682157	2.45356615077631	0.025369377518306688	alpha/beta-hydrolase superfamily protein
ZT0	Medtr5g091560	432.60514790393205	10.98	0.8061320068826878	0.11148226945705547	7.2310333365900945	3.697376041802176e-12	hypothetical protein
ZT0	Medtr4g023510	17.71304073877916	0.24	0.8059332936195533	0.40051157055422626	2.0122597020213577	0.07060719898783563	PPR containing plant-like protein
ZT0	Medtr2g094430	6.491902613305801	0.08	0.8058578751110437	0.6378677911344192	1.2633619165467842	0.27210173318889586	pentatricopeptide (PPR) repeat protein
ZT0	Medtr7g079440	5767.088043117289	73.11	0.8058049631718831	0.06035932515279074	13.350132082028859	6.392972397341963e-39	cytochrome P450 family monooxygenase
ZT0	Medtr0199s0040	333.1479085056254	12.95	0.8051406015927642	0.13324561222854991	6.042529942462529	8.10174627301664e-9	60S ribosomal protein L37a-2
ZT0	Medtr7g102450	1328.1224264071618	10.34	0.8051202167865501	0.19141542860665206	4.2061406577681195	7.755767584888149e-5	UDP-glucosyltransferase family protein
ZT0	Medtr6g048440	4297.234765762446	75.35	0.8046627864091092	0.08313596801174153	9.678876732336409	6.3199133436686764e-21	beta-carotene hydroxylase
ZT0	Medtr0154s0010	2.4109425812737166	0.06	0.8043951295210342	1.6959370790571864	0.47430717769801783	0.6996912957539682	late embryogenesis abundant protein
ZT0	Medtr8g104120	235.2525821069414	3.13	0.804091508796298	0.16642820060344105	4.831461890958357	4.899619231021627e-6	aluminum activated malate transporter family protein
ZT0	Medtr6g075180	6.163347511058827	0.08	0.8030603282042312	0.6954250203400305	1.1547762946630422	0.3184028885871721	PPR containing plant-like protein
ZT0	Medtr3g112480	469.86936483796114	11.53	0.8028592631166545	0.09845591695590002	8.154504959577675	3.645047615913279e-15	auxin-induced 5NG4-like protein
ZT0	Medtr4g053785	48.0132100826838	0.79	0.8028496480232461	0.3509988820199695	2.287328219972989	0.03808347251073615	gland-specific fatty acyl-CoA reductase
ZT0	Medtr8g076250	105.39147774744099	3.1	0.8022967882018911	0.16842667373647843	4.76347819738559	6.728889810589022e-6	transmembrane and coiled-coil protein
ZT0	Medtr5g005710	179.3494442694804	7.29	0.8019607994463228	0.15969201534386285	5.0219217142414445	1.9653223647575853e-6	glycoprotein membrane precursor GPI-anchored protein
ZT0	Medtr5g094300	675.2357882137817	30.36	0.8018776839099422	0.09533705737437753	8.410975815637585	4.541472676460288e-16	import inner membrane translocase subunit TIM22
ZT0	Medtr3g105100	2543.899236611589	57.4	0.8015734199989143	0.10683143917698928	7.503160363410768	5.229233149355247e-13	YGGT family protein
ZT0	Medtr5g092610	514.7840487783482	4.89	0.8009448752311749	0.09382165332660385	8.536887241189351	1.6132661403487924e-16	hypothetical protein
ZT0	Medtr1g061940	143.39490255267594	1.96	0.8003954140036499	0.15202258782573505	5.264976905413232	5.833035425969541e-7	eukaryotic aspartyl protease family protein
ZT0	Medtr1g094190	616.7034459195164	9.94	0.8003423112559919	0.11835992108080089	6.761936844395337	9.067107164641756e-11	RNA pseudouridine synthase
ZT0	Medtr5g015790	944.063836692441	11.54	0.8001246743571229	0.10294383117298887	7.772439253912917	7.053530039291276e-14	phototropic-responsive NPH3 family protein
ZT0	Medtr7g113970	125.2050303513636	1.95	0.799820911088512	0.2230347986746069	3.5860812565639058	8.359314594967327e-4	sugar porter (SP) family MFS transporter
ZT0	Medtr4g131910	9.11970953191623	0.3	0.7992570595073906	0.5945313629994134	1.3443480180341287	0.24039450906431095	SCF ubiquitin ligase, SKP1 component
ZT0	Medtr3g005290	191.86995062106288	5.76	0.798649867629261	0.12988309565867107	6.148990086655228	4.2958543442264604e-9	transmembrane protein, putative
ZT0	Medtr3g081310	277.3349019630446	2.79	0.7981813063604464	0.14634713381557224	5.454027595554557	2.188275090960011e-7	PPR containing plant protein
ZT0	Medtr5g035590	950.1847306158334	10.85	0.7974323165858213	0.09939929551700492	8.022514771741003	1.0319707173735611e-14	LRR ribonuclease inhibitor domain protein
ZT0	Medtr7g007760	656.9932686742319	19.14	0.7972489316012086	0.09492965814379448	8.398312468307614	5.031341718664456e-16	palmitoyl protein thioesterase family protein
ZT0	Medtr2g081930	113.28850803286345	2.62	0.7962606212163876	0.20019208924335502	3.977482947632597	1.9478141499572945e-4	organic cation/carnitine transporter
ZT0	Medtr4g088320	283.4232930827107	2.43	0.7958748186542985	0.11904047797527208	6.6857495214327285	1.4981224613791131e-10	LRR receptor-like kinase
ZT0	Medtr7g063390	1103.921127892768	38.84	0.7951969142442192	0.1678897810775422	4.736422366748734	7.626965729024304e-6	enoyl-(acyl carrier) reductase
ZT0	Medtr3g466380	362.51048993925133	7.08	0.7951100501156457	0.10498152106708471	7.573809581283919	3.1183876283077133e-13	phosphatidate cytidylyltransferase family protein
ZT0	Medtr5g006420	31.188030396468783	0.33	0.7947762286041411	0.3494974645721881	2.274054347080911	0.03931036849729409	organelle transcript processing protein, putative
ZT0	Medtr6g014290	592.987561067534	0.88	0.7944431200393693	0.2087301668709564	3.806077156688708	3.7592287946127295e-4	UDP-glucosyltransferase family protein
ZT0	Medtr8g067530	752.186058121283	13.13	0.7936818161240723	0.08831355144276451	8.987089785857528	3.421759808111e-18	auxin-responsive AUX/IAA family protein
ZT0	Medtr5g035330	569.344259397235	8.44	0.792971161088187	0.1254526156930211	6.320881846167037	1.5146095902472104e-9	RNA recognition motif
ZT0	Medtr4g122960	129.77859722727575	3.73	0.7929584218283655	0.22423186867401385	3.536332397876775	9.957534821078335e-4	serine carboxypeptidase-like protein
ZT0	Medtr1g063360	642.90042575039	92.07	0.7924975740401715	0.09200044673720768	8.614062237152835	8.447761839504607e-17	hypothetical protein
ZT0	Medtr3g074490	259.4511701097161	2.87	0.7916245811611806	0.14222880654005565	5.565852659659608	1.1988763225031185e-7	substrate carrier family protein
ZT0	Medtr3g096830	528.130909919694	9.09	0.791382318667649	0.10128761914895963	7.813218686716239	5.166979536786374e-14	transmembrane amino acid transporter family protein
ZT0	Medtr4g006220	25.093860199008187	1	0.7911644509522648	0.31444675641085135	2.5160521926915393	0.02165968747765154	UBX domain protein
ZT0	Medtr4g086480	2713.3140660114736	48.43	0.790485757940826	0.08565210566454075	9.229028893192528	3.9858689999973215e-19	CXE carboxylesterase
ZT0	Medtr6g465530	18.086494616591125	0.03	0.7903069160259881	1.7004510504678816	0.4647631084755624	0.7056784134903478	dehydration-responsive element-binding protein
ZT0	Medtr4g057230	507.4325108433683	18.59	0.7901142176020939	0.09290486979112439	8.504551154083604	2.1104161215338808e-16	C2H2-type zinc finger protein, putative
ZT0	Medtr8g009650	195.61295149629845	43.29	0.7897166081839042	0.141846114970022	5.567417961012215	1.1885425818341533e-7	hypothetical protein
ZT0	Medtr3g073450	681.3896983489042	18.67	0.7895119124407091	0.09196870465086557	8.584571408696888	1.0818303803124473e-16	co-chaperone GrpE family protein
ZT0	Medtr6g075970	22.50930044597724	0.19	0.7894447776599074	0.3430428763745523	2.30130060126347	0.03683246141922041	disease resistance protein (TIR-NBS-LRR class)
ZT0	Medtr2g031620	341.98279632418445	2.06	0.7894289275783442	0.18580097432964174	4.248787878678001	6.506023378572144e-5	toprim domain protein
ZT0	Medtr2g023320	7351.39431161322	38.27	0.789374075569135	0.0665805074517108	11.855933602513446	6.813361423802118e-31	soluble starch synthase III-1
ZT0	Medtr6g038650	434.9071318591094	11.63	0.788874929017609	0.2665072627925476	2.960050396944261	0.006333243995207213	oxidoreductase family, NAD-binding rossmann fold protein
ZT0	Medtr8g088800	16.12160320871748	0.28	0.7887958758128658	0.48303079016247596	1.6330136543625724	0.14832934105562948	kinetochore Nuf2-like protein
ZT0	Medtr8g039270	7.601414506926797	0.08	0.7886749199130149	0.5968252713920319	1.321450276516465	0.2490732759726294	PPR containing plant-like protein
ZT0	Medtr4g105610	1110.0716409176575	14.39	0.7885488686117067	0.11048329894108984	7.137267588580644	7.116772014218962e-12	CO2+/MG2+ efflux protein ApaG
ZT0	Medtr5g069430	818.3261111486619	5.24	0.7872645279586141	0.08131341695817103	9.681852729957173	6.148911821339694e-21	ribonuclease E/G family protein
ZT0	Medtr1g031730	59.84673031000432	1.43	0.7869072314874221	0.3375676274925083	2.3311098796192655	0.03431871478782741	DNA-directed RNA polymerase III subunit Rpc31
ZT0	Medtr0168s0080	400.190497498672	9.74	0.786611281737375	0.10201009815803111	7.711111899125707	1.1193601738725367e-13	5-formyltetrahydrofolate cyclo-ligase
ZT0	Medtr8g039090	448.417490386962	19.04	0.7864968357404145	0.14751557210272656	5.331619059123573	4.150694515634613e-7	NADPH:quinone oxidoreductase-like protein
ZT0	Medtr6g075290	1940.4372591816154	19.09	0.7852184985831024	0.11366621593457327	6.908108026003763	3.4099303323425825e-11	cyclic nucleotide-gated cation channel protein
ZT0	Medtr1g039490	514.1873685907171	10.92	0.7851561769706475	0.11879797575060645	6.609171343280564	2.4501546828299616e-10	transmembrane protein, putative
ZT0	Medtr1g054525	699.7827449398454	22.81	0.7843720795426743	0.13876486653047132	5.652526458276341	7.450681699144672e-8	disease resistance response protein
ZT0	Medtr3g070470	67.25754992501453	4.21	0.7840831683779479	0.20985664221084424	3.736279967684677	4.866023760277818e-4	DNA replication complex GINS protein
ZT0	Medtr2g437150	109.77521948515877	2.2	0.7834833683117466	0.1883220327932845	4.160338313529958	9.358246399774382e-5	mTERF protein
ZT0	Medtr6g093210	574.1676060666232	9.71	0.7829660682796673	0.1140054594728414	6.867794506509463	4.475566520994469e-11	CemA-like proton extrusion protein
ZT0	Medtr8g013650	90.57191231073774	3.62	0.7825835553472261	0.2010358350154022	3.892756509242589	2.7091520623177503e-4	zinc finger, C3HC4 type (RING finger) protein
ZT0	Medtr4g078200	346.5893031936254	6.62	0.7825581378337713	0.20911031043860906	3.742322108328159	4.7622033595332323e-4	prohibitin complex protein
ZT0	Medtr7g027020	223.56611285986273	8.99	0.7820128192937824	0.23390846558004716	3.3432429106597055	0.0019144217901512616	RALF-like protein
ZT0	Medtr1g011520	103.46390880479376	1.31	0.7818042865610971	0.18668979274471104	4.187718434237995	8.371369959824276e-5	PPR containing plant-like protein
ZT0	Medtr4g057970	7236.76794820911	67.39	0.7810321728807147	0.1831007854801563	4.265586140619586	6.0725969196206146e-5	ruBisCO large subunit-binding protein protein
ZT0	Medtr8g067490	314.79481724178504	2.07	0.7807508542011162	0.1903216064392715	4.102271249219625	1.1854845401954908e-4	zinc finger (C3HC4-type RING finger) family protein, putative
ZT0	Medtr5g080010	431.5607729200812	6.37	0.7805161652237588	0.11683107318734601	6.680724091031431	1.547583449049057e-10	double-strand telomere-binding protein, putative
ZT0	Medtr4g085480	3789.329353373095	107.75	0.7795839617538214	0.12853494048130049	6.0651520810968655	7.090146974695951e-9	Serine/Threonine kinase, plant-type protein, putative
ZT0	Medtr5g014290	1809.0236334901488	24.77	0.7795550574767537	0.09376355289534592	8.314052031996411	1.0058528284022922e-15	FeS assembly protein SufD
ZT0	Medtr8g102820	109.76993756257448	1.89	0.7794269488474733	0.15547854790727214	5.0130835368511795	2.0500911546733255e-6	alpha/beta-hydrolase domain protein
ZT0	Medtr8g083530	44.09057888930307	0.71	0.7791648232037469	0.3346944027069208	2.3279888068102292	0.034557307196234135	cytosolic aldehyde dehydrogenase RF2C
ZT0	Medtr1g092920	1172.9366370968694	17.4	0.7788071502711005	0.07703233613875346	10.110132826145692	9.615732776927733e-23	aspartyl aminopeptidase-like protein, putative
ZT0	Medtr7g081665	497.19054309754927	5.19	0.7787916590831938	0.08171214674839038	9.530916639373876	2.5287770849481863e-20	Serine/Threonine kinase family protein
ZT0	Medtr5g056550	1757.7530464815366	27.42	0.7782327640970338	0.10743500448498881	7.243754191919554	3.3792415909059224e-12	alpha/beta-hydrolase superfamily protein
ZT0	Medtr8g023680	209.08025104488692	3	0.778034119027123	0.14169691560122818	5.4908331329999625	1.7973566256264188e-7	ethylene-responsive transcription factor ERF118-like protein
ZT0	Medtr5g062310	57.13072220812922	1.21	0.7775286878652586	0.2528999704835465	3.0744514773118334	0.004498272859808695	Sec14p-like phosphatidylinositol transfer family protein
ZT0	Medtr5g057040	62.68339255128163	0.37	0.777230162863095	0.2789454291442826	2.7863161810802715	0.010469029131811776	F-box protein interaction domain protein
ZT0	Medtr2g081820	70.30854211217738	1.14	0.7766089972150306	0.2500914095508452	3.1053005723378955	0.004095832230335009	BHLH transcription factor-like protein
ZT0	Medtr4g107620	59.92401399969267	0.52	0.7762602979952453	0.2530546584357592	3.0675598022721555	0.00459232697423648	LRR receptor-like kinase
ZT0	Medtr5g042100	561.6828825520394	9.96	0.7760559136305648	0.10405591055529775	7.458066624847326	7.248556219832876e-13	arabinanase/levansucrase/invertase, putative
ZT0	Medtr4g123860	476.65039024009747	7.54	0.7756636520930382	0.14430286992863395	5.375247578074147	3.3085018160727254e-7	PPR containing plant-like protein
ZT0	Medtr7g050870	15.216251463548772	0.21	0.774591925702248	0.42868187985644485	1.8069154823190567	0.10727357469835727	pectinesterase/pectinesterase inhibitor
ZT0	Medtr7g090510	1805.4108898019715	27.82	0.7744314996602709	0.09604009717851267	8.063626781018467	7.471268120768365e-15	UDP-sulfoquinovose synthase
ZT0	Medtr6g015020	242.22302940877393	7.36	0.7743952867684623	0.11598679661849218	6.676581381203503	1.5892219543983474e-10	biotin carboxyl carrier acetyl-CoA carboxylase
ZT0	Medtr3g491830	2694.211130531703	61.85	0.7739534081361694	0.07302412554319351	10.598598783334676	6.919187281292403e-25	protein phosphatase 2C-like protein
ZT0	Medtr0022s0430	439.9683073477024	4.3	0.7729406030745455	0.10908285987738219	7.085811684286535	1.0131547933054472e-11	plant regulator RWP-RK family protein
ZT0	Medtr1g090120	10.156920638734995	0.07	0.7724379967738734	0.561979735981977	1.3744943942225096	0.2294142667603911	PPR containing plant-like protein
ZT0	Medtr1g086940	2658.9952472778464	68.09	0.7724263944480472	0.09523905478603997	8.11039542741523	5.166419435923805e-15	ATP-dependent Clp protease proteolytic protein
ZT0	Medtr3g088645	4044.835345898727	195.76	0.7723103900113433	0.055810583216378516	13.838063419210002	9.181744116605929e-42	NAD(P)H-quinone oxidoreductase subunit M
ZT0	Medtr5g059050	164.56736732197132	22.08	0.7722327210191836	0.14774717748517502	5.226717248772279	7.0926490739791e-7	transmembrane protein, putative
ZT0	Medtr1g046690	11.86424062871379	1.87	0.7721594671863804	0.5480051684378213	1.4090368333341594	0.21715112360695715	hypothetical protein
ZT0	Medtr4g087895	52.332438969826285	0.94	0.7717261562146228	0.25673501981225366	3.005924773250545	0.00553163307354585	magnesium-chelatase subunit ChlI
ZT0	Medtr2g013500	9.79136850333536	0.12	0.7698985933397176	0.5738902188031899	1.3415433267799721	0.24137235629064527	PPR containing plant-like protein
ZT0	Medtr8g087590	48.52606056033677	2.01	0.7696704064539124	0.2447062656544019	3.1452827919858666	0.0036211800352110015	NB-ARC domain disease resistance protein
ZT0	Medtr1g103530	311.796335857005	3.57	0.7696220850843656	0.1053259580590164	7.307050410622705	2.148733784712131e-12	folate/biopterin transporter
ZT0	Medtr7g111760	349.1099938312143	5.47	0.7694976874926721	0.12746732987627402	6.036822833267034	8.38087622028173e-9	glucose-6-phosphate 1-dehydrogenase
ZT0	Medtr8g079030	15.355432894106192	0.08	0.7690755895979512	0.5615579731550062	1.3695390794240654	0.2312412741089328	prolyl oligopeptidase family protein
ZT0	Medtr3g009510	212.20999308519433	2.72	0.768857380037313	0.12986578045332872	5.920400103502444	1.644861221264156e-8	UDP-glucosyltransferase family protein
ZT0	Medtr1g054630	316.83856513902464	5.1	0.7688225383154799	0.1000596719023581	7.683640408752541	1.376484628040606e-13	DEAD-box ATP-dependent RNA helicase-like protein
ZT0	Medtr6g038230	221.27466380603317	4.46	0.7686311642119619	0.14092724302838971	5.454099205340458	2.1880747628926944e-7	UDP-glucosyltransferase family protein
ZT0	Medtr2g035460	845.5024879607064	22.5	0.7684580275208425	0.06390895742074024	12.024261676837439	9.454591132873608e-32	Mo-molybdopterin cofactor sulfurase
ZT0	Medtr5g035665	13.399418580927202	0.56	0.7683845718071142	0.43516511518316714	1.7657310868856992	0.11600298812841767	DUF1262 family protein
ZT0	Medtr4g094130	973.3211750532575	12.25	0.7681464221353685	0.10163892824687551	7.557600570812613	3.506484011634847e-13	3,4-dihydroxy-2-butanone 4-phosphate synthase
ZT0	Medtr3g067510	92.36689473795214	7.3	0.7679937437460481	0.362518161358857	2.1184972936729936	0.056040265591378036	albumin I
ZT0	Medtr3g017580	575.5764328805376	6.81	0.7674473952419302	0.09504826464575064	8.074291499189835	6.860978421783779e-15	uridine 5-monophosphate synthase-like protein
ZT0	Medtr4g108210	10.651878291786973	0.18	0.7674429809871175	0.5084473813980918	1.5093852561042962	0.18386470175523237	ABC transporter A family protein
ZT0	Medtr7g087250	2326.1066942627212	49.13	0.7671794811751433	0.09902556044535138	7.747287445028114	8.54585555727811e-14	co-chaperone GrpE family protein
ZT0	Medtr6g015695	397.1581037802283	3.05	0.7667399873304841	0.13732772112163025	5.583286324626239	1.0902550644515174e-7	disease resistance protein (TIR-NBS-LRR class)
ZT0	Medtr3g061090	168.93709952282205	6.24	0.7662913098065106	0.13670460489094838	5.605453528195297	9.660663185491238e-8	BTB/POZ domain plant protein
ZT0	Medtr3g096900	200.59649249248633	1.85	0.764356542567571	0.14958911330808672	5.109707021214426	1.2731530734788195e-6	beta-galactosidase
ZT0	Medtr3g072190	365.2770566090563	8.55	0.7641801966185336	0.14265793556320738	5.356731075643168	3.644454682186841e-7	peroxidase family protein
ZT0	Medtr5g077080	29.943248998789567	0.44	0.7641539715213151	0.3058212487051548	2.4986948250219307	0.022651521204982986	aarF domain kinase
ZT0	Medtr1g007870	181.03165843068697	26.23	0.7632861202954588	0.13740841152232272	5.554871873120074	1.2724331614971085e-7	transcription factor Pcc1
ZT0	Medtr5g006530	37.72529381695756	0.43	0.7630210049861821	0.3393725718433508	2.2483284398669112	0.04177363721712989	tesmin/TSO1-like CXC domain protein
ZT0	Medtr8g005870	24.319725282988774	0.18	0.7628569992638892	0.46080894022685553	1.6554735220378665	0.14242478120521102	PPR containing plant-like protein
ZT0	Medtr1g484940	1750.020519282716	14.82	0.7628022050040668	0.12045028191523399	6.332921707405245	1.4052698959226262e-9	fungal proteinase A, aspartic proteinase superfamily protein
ZT0	Medtr4g007190	2884.6834475404366	61.62	0.7627317111547938	0.06936267123488599	10.996285142651448	1.031562465192777e-26	Low PSII accumulation protein
ZT0	Medtr4g059530	93.48076455403374	2.01	0.7613007657682077	0.17331144923783262	4.392674396966622	3.537763915591646e-5	telomere recombination domain protein
ZT0	Medtr8g068220	121.93429368720759	3.31	0.7612167368555028	0.18482707258819553	4.118534834729185	1.110831371613978e-4	tRNA/rRNA methyltransferase SpoU family protein
ZT0	Medtr4g065003	83.7567819740372	1.42	0.7611958977389808	0.17177261536855046	4.431415893073412	2.990443034694783e-5	LRR receptor-like kinase
ZT0	Medtr3g071560	222.4181039669535	6.25	0.7611696644294319	0.19397861218534518	3.923987577053803	2.400921769207341e-4	eukaryotic translation initiation factor 2 alpha
ZT0	Medtr4g114180	3099.6129422071176	203.76	0.7607309902159028	0.11728882570628286	6.485963054323191	5.381622797756729e-10	chaperon protein P13.9, putative
ZT0	Medtr3g014680	675.7940308821529	11.18	0.7597724822235955	0.09037935523713678	8.406482655581126	4.715104775194193e-16	transglutaminase family protein
ZT0	Medtr4g033315	133.42425387865464	1.98	0.7590511235148979	0.14930372719157367	5.083939549218011	1.4463184421088653e-6	proton-dependent oligopeptide transport family protein
ZT0	Medtr5g023760	230.50555968407886	3.66	0.7581993345389041	0.15517136670018572	4.886206461040319	3.7793434829212757e-6	serine acetyltransferase
ZT0	Medtr2g099940	274.6832107644568	7.04	0.758170743773834	0.117578048124468	6.44823379761531	6.83998160795173e-10	nucleosome assembly protein
ZT0	Medtr1g054715	142.61806770522088	3.02	0.7577394591078562	0.13654744903430072	5.549275833908197	1.3121526885953771e-7	TRAF-type zinc finger protein
ZT0	Medtr8g041600	305.3738650900127	6.34	0.7575020591916366	0.12705208079760144	5.9621381596918885	1.2941127816941055e-8	2OG-Fe(II) oxygenase family oxidoreductase
ZT0	Medtr2g098560	103.78403683053797	4.69	0.7571155736455061	0.2055653575532776	3.6830893233033195	5.909230132454544e-4	hypothetical protein
ZT0	Medtr6g021740	126.56482297945337	1.32	0.7567013334469569	0.21795954826019928	3.4717512469038967	0.0012421292063519319	PPR containing plant-like protein
ZT0	Medtr5g042880	80.79633248476226	1.25	0.7557210933366967	0.2522703726328529	2.9956791415873143	0.005704067506639951	argininosuccinate synthase
ZT0	Medtr3g101320	180.07451035985287	8.52	0.7556136987564083	0.14349823318458788	5.265665520664845	5.81290552215429e-7	pheromone receptor-like protein
ZT0	Medtr3g109950	830.8737395987254	15.26	0.755005543143823	0.22558982194557467	3.346806769172299	0.0018916647670251163	sulfite exporter TauE/SafE family protein
ZT0	Medtr2g017960	139.78590753783263	3.86	0.75471479693999	0.24674786029860174	3.0586477873675273	0.0047163888784096854	fasciclin domain protein
ZT0	Medtr1g072640	374.9708766346593	8.25	0.7535667771699286	0.11943133108401036	6.309623867792739	1.622696057045882e-9	PALE CRESS protein (PAC)
ZT0	Medtr2g097680	547.4668051279086	29.36	0.7534701827036091	0.1532767423930933	4.915750236727113	3.2799084837324773e-6	transmembrane protein, putative
ZT0	Medtr6g471070	22.893929989464652	2.17	0.753409319246756	0.4135662333660156	1.8217379913121956	0.10419289907195046	chaperone DnaJ domain protein
ZT0	Medtr3g014390	150.0363430650817	0.76	0.7533368498569993	0.16138282326733738	4.668011344733172	1.0426657689486144e-5	LRR and NB-ARC domain disease resistance protein
ZT0	Medtr7g099610	57.250737759311704	6.41	0.7530990411474047	0.23938261045710246	3.1460056338652076	0.003613899885812289	histone H4 domain protein
ZT0	Medtr7g080430	542.9679642492	8.16	0.7519767312020802	0.09716786089347618	7.738944999792289	9.082189851856495e-14	peptide chain release factor 2
ZT0	Medtr1g066970	602.4188240295159	3.97	0.7517842326807368	0.11917587673671352	6.3081913325596775	1.6361207865201597e-9	RNA-binding (RRM/RBD/RNP motif) family protein, putative
ZT0	Medtr7g066990	10.581289333389666	0.11	0.7516302447354588	0.5109067560791337	1.4711691238998603	0.1961317793262607	pentatricopeptide (PPR) repeat protein
ZT0	Medtr4g064807	402.96879340661144	75.87	0.7512000371499569	0.1309190269944953	5.7378981069080375	4.628849355764069e-8	monosaccharide-H+ symporter
ZT0	Medtr1g089865	1087.5127499893135	15.51	0.7511045129506434	0.07697452395871637	9.757832518113164	3.003709739947628e-21	2OG-Fe(II) oxygenase family oxidoreductase
ZT0	Medtr3g033040	364.5935899399475	4.92	0.750161655316659	0.09768098882585707	7.679709883506873	1.4176138134239036e-13	PPR containing plant-like protein
ZT0	Medtr1g027040	8.652451951112909	0.16	0.7501305349437943	0.5182564836289693	1.4474117712742955	0.2039480807110221	receptor-like kinase
ZT0	Medtr1g073010	15.170050811828077	0.19	0.7497338615371453	0.48697857962263613	1.5395622988553632	0.1747400433505964	Obg family GTPase CgtA
ZT0	Medtr4g098890	829.6827024088111	3.41	0.7494318506325139	0.08405585801633503	8.915878896707863	6.381595049340955e-18	methyltransferase PMT14-like protein, putative
ZT0	Medtr8g011430	1560.5755419918062	25.52	0.7490939834806493	0.10422588639849338	7.187216241237721	5.017955227623509e-12	lectin kinase family protein
ZT0	Medtr1g043450	70.54227034360564	3.25	0.7490877065426363	0.25503030507686025	2.9372497763231653	0.00677802181953702	CASP-like protein
ZT0	Medtr7g082220	149.33289394324507	1.32	0.7488607739947852	0.13395183777044298	5.590522582289084	1.0483216397998699e-7	DUF4378 domain protein
ZT0	Medtr2g095750	804.8510573544507	14.63	0.7484344648779532	0.1108097244527648	6.754230899626419	9.537802670536893e-11	serine carboxypeptidase-like protein
ZT0	Medtr7g056233	592.3793494163525	12.05	0.7483485571832308	0.09555923070155083	7.831253471686706	4.5171720779883224e-14	oleoyl-[acyl-carrier] hydrolase (acyl-ACP thioesterase)
ZT0	Medtr3g110360	493.84383736038507	8.63	0.7481323992948028	0.14454247097565737	5.175865572554083	9.171939861537153e-7	tryptophan-tRNA ligase
ZT0	Medtr1g112280	419.31789219429436	4.07	0.7479113502651903	0.11082670810851407	6.7484757332400935	9.893883980439391e-11	protein accumulation AND replication OFs protein
ZT0	Medtr1g079270	15.65299397318579	0.42	0.7475772893234736	0.42905648442109656	1.742374993661127	0.12129117025388328	glycoside hydrolase family 81 protein
ZT0	Medtr7g089080	15.28245205824868	0.07	0.7470648811491769	0.4788413439226153	1.560151166207379	0.1687328816900274	cyclin
ZT0	Medtr1g029000	146.6391114133861	3.42	0.7468282691096824	0.1479633866658308	5.047385613012246	1.7340055431819087e-6	transmembrane protein, putative
ZT0	Medtr4g085110	2.883276643132535	0.03	0.7466550716637157	0.9588286801833518	0.7787158301532415	0.5126452666765956	pentatricopeptide (PPR) repeat protein
ZT0	Medtr8g012570	539.2654478676267	6.62	0.7466336238392169	0.08054384200895752	9.26990326282401	2.7544876582461667e-19	GTP cyclohydrolase I 1
ZT0	Medtr4g007560	123.43124692359811	10.36	0.7466004480200209	0.17510687741795478	4.26368432256372	6.123233188829469e-5	transmembrane protein, putative
ZT0	Medtr8g089665	101.46431778530204	1.65	0.7464053243652241	0.1747715813981352	4.270747671870573	5.942606220569716e-5	cellulase (glycosyl hydrolase family 5)
ZT0	Medtr3g078637	166.0190334003911	2	0.746336672838873	0.17307437118563226	4.3122310237278505	4.9927468957767135e-5	glycine cleavage T-protein aminomethyltransferase
ZT0	Medtr2g025580	508.9581742688545	18.32	0.7463332776076579	0.10610585573091914	7.033855695017754	1.4494253791345752e-11	blue copper-like protein
ZT0	Medtr4g459430	93.82398162064827	2.01	0.7456584002130802	0.1722083873466972	4.329977254312761	4.629921912349727e-5	telomere recombination domain protein
ZT0	Medtr4g077000	143.99827283383783	2.34	0.7456041167731695	0.20589121047801606	3.621349911159909	7.371415832833546e-4	DUF3411 domain protein
ZT0	Medtr7g038690	694.4570503249872	5.77	0.7454302447924444	0.09741399622978797	7.6521883265528245	1.7404289081658825e-13	LRR receptor-like kinase
ZT0	Medtr8g071180	63.77520073714277	2.57	0.7449634206529852	0.25023156270307234	2.9770961448894733	0.006021936013384347	cadmium-induced protein AS8, putative
ZT0	Medtr1g112320	467.2448378761051	11.86	0.7449202849531857	0.10451793971372815	7.1272002394373875	7.619074977485082e-12	DUF615 family protein
ZT0	Medtr7g112650	287.47730159369326	8.97	0.7447840032247356	0.10901761230459742	6.831776879719159	5.6993541138596015e-11	hypothetical protein
ZT0	Medtr4g031650	941.396588040065	71.62	0.7445805162453187	0.1000258036844054	7.443884366023875	8.022577633649813e-13	hypothetical protein
ZT0	Medtr4g029020	373.59971423180576	8.2	0.7445669558817561	0.17942717064769803	4.149688997457914	9.768148666011978e-5	CBL-interacting kinase
ZT0	Medtr2g090330	122.35505626674475	4.53	0.7445114456206351	0.18923696456487177	3.934281271804121	2.3108128362372596e-4	zinc finger, C3HC4 type (RING finger) protein
ZT0	Medtr4g117530	60.76011975212953	0.87	0.7444090825867149	0.313384831310124	2.375383261131907	0.030805581307226517	galactose oxidase
ZT0	Medtr7g085800	112.26683986560955	0.82	0.7443600517447833	0.23627084589222136	3.1504523926085013	0.0035631519713665923	tubulin beta-1 chain
ZT0	Medtr7g091410	1243.228665902464	13.63	0.7437822111343505	0.08300770355561787	8.960399809591072	4.3216525381026365e-18	PPR containing plant-like protein
ZT0	Medtr2g017950	147.5214967132932	3.55	0.7437360327069515	0.22223469326819262	3.3466243356045746	0.0018926031871046235	fasciclin domain protein
ZT0	Medtr4g072020	2946.642470638365	24.58	0.743699991318228	0.08577836481634207	8.670018283870828	5.262027318408731e-17	arginine decarboxylase
ZT0	Medtr1g107085	43.450561710330646	4.24	0.7436528572488915	0.30528634684472966	2.435919145860517	0.026521490753422305	hypothetical protein
ZT0	Medtr7g013730	554.4120483057269	11.63	0.7428615647840303	0.1253980302324074	5.924028977227491	1.6118438003136358e-8	RNA-binding (RRM/RBD/RNP motif) family protein
ZT0	Medtr2g085340	263.2075534712271	6.07	0.7426216111203067	0.1049115209753275	7.078551566276046	1.0660231677779817e-11	RNA-binding S4 domain protein
ZT0	Medtr4g010180	123.73347385968371	0.85	0.7423206051831251	0.34016240892201466	2.182253493369718	0.04864317895996023	LURP-one-like protein
ZT0	Medtr8g012580	104.136814705854	5.92	0.7422845432318129	0.1929436364940031	3.8471574223433067	3.2164598688426324e-4	hypothetical protein
ZT0	Medtr6g034205	470.30701677534114	21.9	0.7422253326843182	0.1407741731263399	5.272453861392578	5.616624342271783e-7	DUF3143 family protein
ZT0	Medtr4g032660	339.5767428131455	14.02	0.7418165583777712	0.12773331981254865	5.807541520618134	3.126365162639804e-8	50S ribosomal protein L18 family protein
ZT0	Medtr6g046960	131.11400073654963	3.7	0.7412848251885433	0.2092977969841473	3.5417707967785725	9.765402857845097e-4	nucleotide-diphospho-sugar transferase superfamily protein
ZT0	Medtr2g095510	322.0063991476977	4.3	0.7410112541418163	0.10989422084111027	6.74295016125736	1.026220538333359e-10	4-coumarate:CoA ligase-like protein
ZT0	Medtr1g442840	405.0750136924215	4.2	0.7409779967570335	0.12358539296251256	5.995676179803838	1.0647855699858715e-8	S-adenosylmethionine-dependent methyltransferase, putative
ZT0	Medtr3g103460	15.251786905300891	0.15	0.7404410690377955	0.5144832812008545	1.4391936455340848	0.20678785268849253	AP2-like ethylene-responsive transcription factor
ZT0	Medtr3g084630	122.712432091003	1.74	0.7400213301857159	0.3991825513039164	1.8538418770270924	0.0977536892511185	xyloglucan endotransglucosylase/hydrolase family protein
ZT0	Medtr4g123070	12951.592402093904	111.77	0.7387563486446778	0.06428440465192634	11.491999539308797	4.3673849208711346e-29	dihydrolipoyl dehydrogenase
ZT0	Medtr4g058930	123.35077574451721	1.11	0.7384100388341295	0.16578280011885801	4.4540811127856825	2.7116817094045727e-5	auxin response factor, putative
ZT0	Medtr4g081220	28.763722330355357	0.27	0.7383320996192061	0.31603518914820317	2.3362338276607826	0.03389128184459079	PPR containing plant-like protein
ZT0	Medtr5g072860	128.15090481492976	1.82	0.7383097705749062	0.19427734940098093	3.80028743881544	3.8377780798684884e-4	UDP-glucosyltransferase family protein
ZT0	Medtr4g132110	5393.922464880189	199.14	0.7381927694336953	0.09976823003471698	7.399076531445147	1.1112473486770684e-12	cationic peroxidase
ZT0	Medtr3g498725	19470.455834458706	158.18	0.738186313921069	0.06548084014961526	11.273317694678454	5.028965574480487e-28	ATP-dependent Clp protease ATP-binding subunit
ZT0	Medtr1g050458	409.2349177442854	9.47	0.7380896772233836	0.10726012145419554	6.881305626141567	4.085619513690279e-11	alpha/beta fold hydrolase
ZT0	Medtr5g080400	9.064219895777763	0.42	0.7377693091869458	0.7747309346744	0.9522910163604242	0.4176718087713422	leghemoglobin Lb120-1
ZT0	Medtr2g087760	123.81238897681897	3.86	0.7377381352638616	0.17354724682759404	4.250935400875291	6.448732883598142e-5	hypothetical protein
ZT0	Medtr2g020160	2373.8643328370654	34.86	0.7377155764111751	0.0825149816472001	8.940383451399669	5.1532849041595235e-18	3,8-divinyl protochlorophyllide A 8-vinyl reductase
ZT0	Medtr7g103600	6.819993443373956	0.06	0.7374816117376406	0.7172107851715029	1.0282634157004351	0.37879390324314804	pentatricopeptide (PPR) repeat protein
ZT0	Medtr1g039410	441.7024985521144	12.63	0.7369947612322328	0.10261921789635636	7.181839584633989	5.206894507798078e-12	inosine-uridine preferring nucleoside hydrolase
ZT0	Medtr8g102270	6.269078656352031	0.07	0.7367571568204008	0.7866858433191085	0.9365328778664003	0.425869647129411	DUF1005 family protein
ZT0	Medtr7g110380	131.1551766174172	2.09	0.736455903682751	0.17657629505276043	4.170751818428971	8.973979032260481e-5	triose-phosphate transporter family protein
ZT0	Medtr3g013570	13.552899618464485	6.36	0.7361254828152488	0.4716906473344201	1.5606107243702654	0.168612205111555	hypothetical protein
ZT0	Medtr6g078300	99.05771191611828	7.16	0.7359049261775457	0.19494459909550402	3.774943905047728	4.2211075367548054e-4	ribosomal protein L37
ZT0	Medtr8g468600	537.6014714549342	11.66	0.7358255103211125	0.08107258809183514	9.076131990354183	1.5590798411081083e-18	zinc knuckle (CCHC-type) family protein
ZT0	Medtr3g013710	265.4918184688884	2.89	0.7357857902655497	0.16255860425094232	4.52628019080254	1.975748591152926e-5	aicarft/IMPCHase bienzyme family protein
ZT0	Medtr2g058330	204.62955488976795	4.96	0.7352769686297048	0.1438707919792562	5.11067575645041	1.2671811491439465e-6	2-aminoethanethiol dioxygenase-like protein
ZT0	Medtr4g099130	335.9383450309664	6.68	0.7352488339955606	0.11655194589797359	6.308335981272912	1.6349246344992567e-9	receptor-like kinase plant
ZT0	Medtr2g093510	25.924444971622872	0.23	0.7349237067628599	0.31616413351916917	2.3245005642561325	0.03484617730099714	pre-mRNA-processing-splicing factor
ZT0	Medtr4g059680	100.31265872833237	0.79	0.7348326891005157	0.1932611437088322	3.802278487017632	3.809892759758581e-4	beta-galactosidase
ZT0	Medtr4g133070	550.5011364359092	19.63	0.7346882712569898	0.10001286582857571	7.34593759683141	1.6297780595635006e-12	hypothetical protein
ZT0	Medtr3g040090	562.3307078896562	11.76	0.7346234692396322	0.084294643100972	8.714948450041677	3.596516299736217e-17	ABC-type transport system protein
ZT0	Medtr2g078120	347.76591398824064	2.64	0.7343275765279448	0.14482895419869157	5.070309183621647	1.5493861219338183e-6	tRNA dimethylallyltransferase
ZT0	Medtr8g093250	151.99742437743998	1.94	0.73431359755223	0.22051449239985593	3.330001532147416	0.002000052848498954	cystathionine beta-lyase family protein
ZT0	Medtr6g004400	610.2846427768206	8.18	0.7340001609016882	0.08522026837251356	8.612976407129318	8.524613404268401e-17	tRNA pseudouridine synthase B
ZT0	Medtr4g072030	134.33146742779823	2.35	0.7336867314674148	0.19163863192911618	3.8284907593099122	3.452199993754851e-4	polyol/monosaccharide transporter 1
ZT0	Medtr5g009130	40.26633962604003	2.64	0.7333301169731126	0.27883530899203146	2.6299758076695716	0.016104516652652973	late embryogenesis abundant hydroxyproline-rich glycoprotein
ZT0	Medtr5g067640	256.83335665082825	2.37	0.7331536908393099	0.1366745311546437	5.364230516435907	3.506285709662074e-7	glycerol-3-phosphate dehydrogenase [NAD(+)] protein
ZT0	Medtr4g019450	75.14600820705033	0.91	0.7331397649764132	0.2257311288271825	3.247845207639473	0.002616356526235477	BEL1-like homeodomain protein
ZT0	Medtr6g053090	429.1163939358274	10.12	0.7329916249576705	0.10139456871412393	7.229101462271589	3.744278487200322e-12	PPR containing plant protein
ZT0	Medtr1g022295	213.9211674189138	8.91	0.7329145331165284	0.14934506379792753	4.9075243230549885	3.414255657856391e-6	Maf DDB-G0281937-like protein
ZT0	Medtr8g071280	170.26090493057677	2.55	0.7325194467911712	0.1425844633201501	5.13744225516646	1.109039445386083e-6	methyltransferase PMT16, putative
ZT0	Medtr8g005710	61.1501214394501	0.41	0.7320008206980444	0.2667605298521008	2.744037212341291	0.01179079765176126	subtilisin-like serine protease
ZT0	Medtr2g014170	22.222601322602014	0.6	0.731777627975906	0.3424491077979454	2.1368945379401465	0.05378784068510091	Dof-type zinc finger DNA-binding family protein
ZT0	Medtr4g100720	15.054176415369106	0.15	0.7315428068597634	0.8521459653546187	0.8584712438969694	0.468129081221844	myb transcription factor
ZT0	Medtr4g084180	843.1834439787416	75.18	0.7314139489548267	0.11003203900728338	6.647281605918545	1.9200635834669191e-10	sulfiredoxin
ZT0	Medtr6g016880	1062.2778182670327	19.24	0.7314050225930863	0.09022605329714357	8.106361697816183	5.327396496778141e-15	Pmr5/Cas1p GDSL/SGNH-like acyl-esterase family protein
ZT0	Medtr2g006210	225.34806589294297	1.57	0.7311207963301065	0.22118079815760427	3.30553466856169	0.002168444224304303	plastid developmental protein DAG, putative
ZT0	Medtr4g088385	412.7245184598076	13.4	0.7306838956497933	0.21167789701833425	3.45186675577425	0.0013288828035180878	hypothetical protein
ZT0	Medtr5g021810	303.64117914317825	1.77	0.73049074714247475	0.19397095278287357	3.7659800947627895	4.3654049476986697e-4	filament-plant-like protein
ZT0	Medtr3g116050	574.2530131499628	14.53	0.7302964565608381	0.08975012674787607	8.136996381212581	4.183648219759596e-15	multiple division site protein, putative
ZT0	Medtr7g009710	173.35866248983865	3.09	0.7297682550081066	0.1741352438175336	4.1908130658075695	8.269179867537366e-5	2-aminoethanethiol dioxygenase-like protein
ZT0	Medtr4g070640	13.78755656577397	0.63	0.7292630505912537	0.4875839624244105	1.4956666067627489	0.18812409671645777	transmembrane protein, putative
ZT0	Medtr4g010270	162.12791960214633	12.22	0.729166410710424	0.1536464847207739	4.745740926227884	7.304179528964991e-6	transmembrane protein, putative
ZT0	Medtr2g088400	2040.919825143094	26.96	0.7289197589830868	0.07724583821537435	9.436362862044895	6.050480918698349e-20	MATE efflux family protein
ZT0	Medtr4g074050	632.7123299446907	17.55	0.7287930422703963	0.0863801085222449	8.437047078757896	3.673823902528791e-16	magnesium transporter NIPA2-like protein
ZT0	Medtr1g080110	308.8985305371196	5.06	0.7280740074232569	0.1323877417864833	5.499557569291455	1.7157883549223863e-7	pentatricopeptide (PPR) repeat protein
ZT0	Medtr2g093980	142.04942763263534	4.32	0.7276216615920575	0.17900498023732844	4.064812390288594	1.377983893859403e-4	fasciclin domain protein
ZT0	Medtr5g006670	20.93824878683991	0.49	0.7276038358826559	0.3675346083096687	1.9796879516434773	0.075616803253587	12-oxophytodienoate reductase-like protein
ZT0	Medtr1g107485	1047.9885505462485	15.16	0.7270917365093644	0.06839571906013486	10.630661487308746	4.9643217676732e-25	Na+/H+ antiporter
ZT0	Medtr5g009770	370.8473207682042	4.08	0.7270708621410117	0.09238926137476841	7.869646875860568	3.369703011014982e-14	cation/H+ exchanger 3
ZT0	Medtr7g091520	148.90984057539424	4.98	0.7270332876254303	0.15167876560619684	4.79324369973464	5.856125294228785e-6	S-adenosylmethionine-dependent methyltransferase
ZT0	Medtr7g019160	415.16252681948663	73.9	0.7254474751449117	0.10626302467341867	6.8269040654023465	5.889108880048545e-11	hypothetical protein
ZT0	Medtr6g092630	2273.200174834871	38.17	0.7253640487020019	0.10352939039701888	7.006358734658296	1.7492106358031257e-11	S-adenosyl-L-methionine-dependent methyltransferase
ZT0	Medtr8g091410	2934.101754582908	97.4	0.725262806159181	0.10727029299438771	6.7610778894500285	9.116780118862239e-11	FKBP-type peptidyl-prolyl cis-trans isomerase
ZT0	Medtr3g005360	176.7444053115988	1.33	0.7247361934037272	0.17699929126857294	4.094571160197677	1.222846958883064e-4	deoxyribonucleoside kinase
ZT0	Medtr5g058430	302.42569812481355	6.7	0.7242559116220567	0.1256899150983213	5.762243621976396	4.039501588607959e-8	N-acyl-L-amino-acid amidohydrolase
ZT0	Medtr4g110040	322.37430637971505	3.48	0.7241923701120092	0.13636841777347108	5.31055783982919	4.625672922560139e-7	transcription factor BIM2-like protein
ZT0	Medtr4g114030	503.43366762493275	11.35	0.7241580842249707	0.13574273429926467	5.334783389794246	4.0838403328760297e-7	NADH-cytochrome b5 reductase-like protein
ZT0	Medtr7g100830	63.80449803529105	1.7	0.7238464185125737	0.252751232618975	2.863868994869669	0.008394190065354204	protamine P1 family protein
ZT0	Medtr7g073550	358.29203095752575	6.44	0.7237388562184487	0.14821860409456164	4.882915074255538	3.837565582456949e-6	mannan endo-1,4-beta-mannosidase
ZT0	Medtr4g021750	902.8498840666448	7.74	0.7234826199278119	0.07385828528166805	9.795551266438398	2.0926994268350867e-21	ribonuclease II
ZT0	Medtr5g006320	1320.245534994189	75.75	0.7227278195740476	0.08487399729062997	8.51530318643112	1.9297775867975836e-16	2Fe-2S ferredoxin superfamily protein
ZT0	Medtr2g088820	104.59134087508573	1.64	0.7223088720420693	0.1710029717241184	4.223955085455361	7.216724871021748e-5	histone-lysine N-methyltransferase
ZT0	Medtr4g094100	335.89280677449767	5.8	0.7222678971469059	0.11575480206587364	6.239636578842563	2.4907159772512554e-9	1,4-dihydroxy-2-naphthoate octaprenyltransferase
ZT0	Medtr7g083030	1223.7582914804564	22.71	0.7218204968828731	0.10734552574735169	6.724271848849565	1.1610837521221233e-10	phenylalanyl-tRNA synthetase
ZT0	Medtr6g012850	10.90578002639324	0.12	0.7215582425213762	0.5332386497277717	1.3531619339478584	0.23720892403453295	pentatricopeptide (PPR) repeat protein
ZT0	Medtr3g026110	1114.250989410014	9.43	0.720262443019665	0.11498308340886242	6.264073128553362	2.1473950448019428e-9	longifolia protein
ZT0	Medtr4g074350	1134.4731228505252	11.93	0.7202390182590919	0.11166385298982663	6.450064179002589	6.759310051595106e-10	delta(24)-sterol reductase-like protein
ZT0	Medtr3g023160	222.4550014381942	18.41	0.7196899934741389	0.1371739375318877	5.246550521354236	6.408139694764444e-7	high chlorophyll fluorescence 153 protein
ZT0	Medtr5g096750	11.362384445984699	0.12	0.7188742812372068	0.4945800014307139	1.453504547611423	0.2019074306754702	subtilisin-like serine protease
ZT0	Medtr2g449830	323.60273502666615	6.17	0.7186153911151331	0.10667633373878178	6.736408779053147	1.0711215982936533e-10	FAD-dependent oxidoreductase family protein
ZT0	Medtr2g090760	329.5129115640965	6.83	0.7183261542250527	0.1592497277809152	4.510689997619816	2.1123197401072767e-5	prohibitin complex protein
ZT0	Medtr8g101470	301.88095705868	3.36	0.7176944934374386	0.14746638191289263	4.866834624459531	4.147775403776544e-6	ethanolamine-phosphate cytidylyltransferase
ZT0	Medtr1g041815	79.05901036995834	0.69	0.7175238344082169	0.2443071629171158	2.9369742001860404	0.0067835614273773414	peptide transporter 1
ZT0	Medtr4g109600	3747.336574645465	91.88	0.7167397988245743	0.07646790932138454	9.37307957266376	1.0818214600723156e-19	glycerophosphoryl diester phosphodiesterase family protein
ZT0	Medtr8g076240	95.06366895249556	2	0.7166403549305492	0.16844159785086635	4.25453310865077	6.354012647039495e-5	transmembrane protein, putative
ZT0	Medtr4g113100	820.3235462348185	7.33	0.7152512949168413	0.10697598846394792	6.68609194630521	1.4949645609802653e-10	LRR receptor-like kinase
ZT0	Medtr2g010250	1692.000948316401	21.41	0.71394964004708	0.19466935774163663	3.6674988212301356	6.250465028825737e-4	cytochrome P450 family 87 protein
ZT0	Medtr5g031360	5324.720988102717	98.17	0.7139141835401964	0.11240970259033974	6.351001444616835	1.255535053951976e-9	cinnamyl alcohol dehydrogenase family protein
ZT0	Medtr3g079530	448.907530075209	8.86	0.7137837468626841	0.16618618465219284	4.295084747005567	5.362780348724413e-5	haloacid dehalogenase superfamily protein
ZT0	Medtr7g100430	191.0273937431302	3.27	0.7137089502684961	0.17081476272838086	4.178262691518017	8.706199537049441e-5	ankyrin repeat plant-like protein
ZT0	Medtr3g453010	14.442237758085852	1.67	0.713582966465925	0.6086593027372144	1.1723848847078426	0.31049179400681276	hypothetical protein
ZT0	Medtr7g107050	667.5015070260348	10.03	0.7134386592862237	0.06774280169821384	10.53157887482287	1.3748716189534662e-24	D-lactate dehydrogenase (cytochrome)
ZT0	Medtr1g013120	58.59804237876078	0.88	0.7124818576355564	0.29348116493336024	2.427691936541608	0.027079956956103355	glycoprotein family protein
ZT0	Medtr5g096850	196.87311459919343	3.51	0.7118690746221465	0.11863937373572475	6.00027673955757	1.0369589619673448e-8	transmembrane amino acid transporter family protein
ZT0	Medtr3g103010	1153.991208248819	71.26	0.7118235692153445	0.06886120468806667	10.33707691347869	9.921845107026098e-24	adenine phosphoribosyltransferase-like protein
ZT0	Medtr6g027670	103.95553649673799	1.47	0.7117874604370426	0.3876266116455952	1.8362708829904222	0.10122475189983478	cationic amino acid transporter 2, vacuolar protein
ZT0	Medtr2g096100	675.4428593064574	94.85	0.7116478410794008	0.07563192065291363	9.409358309770564	7.753236213388685e-20	histone H4 domain protein
ZT0	Medtr1g021985	47.61534407688167	0.77	0.7114960304897416	0.271226241204419	2.6232566116399414	0.016394233489601333	methyltransferase-like protein
ZT0	Medtr8g463270	6.939688761509825	0.07	0.7114312774254546	0.5806476329030442	1.2252375401386482	0.28796901526705226	dynamin 5A-like protein
ZT0	Medtr7g031470	135.3930576761343	2.02	0.7107772363740489	0.18578655798750074	3.8257732102549005	3.487893078371928e-4	inactive LRR receptor-like kinase
ZT0	Medtr8g089560	153.1932088077888	39.24	0.7105450754560635	0.1382964772634168	5.137839296532986	1.106853844585586e-6	RPM1-interacting protein 4 (RIN4) family protein
ZT0	Medtr1g023260	187.81364928859466	8.35	0.7102240734524765	0.12718157794777665	5.584331354530835	1.0842464835816824e-7	salt tolerance-like protein
ZT0	Medtr8g075810	98.55561769912715	1.12	0.7094625570571899	0.18270808903279687	3.883038571597333	2.808763697126963e-4	apurinic/apyrimidinic endonuclease
ZT0	Medtr8g075960	2227.5055222225387	96.36	0.708810198745515	0.06015077768537846	11.783890849308397	1.577988152201725e-30	transmembrane protein, putative
ZT0	Medtr1g066900	1281.673024868567	8.78	0.7087589514550439	0.07998437336003839	8.861217781436698	1.0293548448522318e-17	PPR containing plant-like protein
ZT0	Medtr3g040370	2234.459904911261	16.43	0.708288356609041	0.06550963008986846	10.811973073842513	7.32121355520106e-26	methyltransferase PMT2-like protein
ZT0	Medtr7g068530	456.2630999554968	21.78	0.7082116401103136	0.12017234561021571	5.893299631576046	1.921262955287296e-8	GDSL-like lipase/acylhydrolase
ZT0	Medtr1g023310	1108.5840445519025	10.09	0.7076360935815261	0.09206607811835403	7.6861761470042875	1.3511747234615697e-13	protein accumulation AND replication OFs protein
ZT0	Medtr4g020535	93.0278054541269	0.66	0.7074662738073362	0.2592213531970579	2.729197518190279	0.012288238740727448	disease resistance protein (TIR-NBS-LRR class)
ZT0	Medtr1g112270	390.1093025859298	4.28	0.7062903527746427	0.10869017762815829	6.4981985326304645	4.985166950380168e-10	C2H2 zinc finger protein, putative
ZT0	Medtr5g007050	201.1830894098948	3.5	0.7061195342764878	0.16235370032639948	4.3492666496475865	4.266848099815895e-5	nucleotide-diphospho-sugar transferase superfamily protein
ZT0	Medtr3g083910	86.83322002612259	0.64	0.7060897063249045	0.26724355024127155	2.64212066366966	0.01559599861773544	chalcone and stilbene synthase family protein
ZT0	Medtr7g074120	229.45814100666183	6.75	0.7054226958283779	0.11985161006917619	5.885800744948029	2.003322821394663e-8	plant/F17O14-7 protein
ZT0	Medtr3g026400	11154.212820126055	171.37	0.7054215928557415	0.12131217158184379	5.814928408727938	2.999163750744494e-8	glycoside hydrolase family 1 protein
ZT0	Medtr1g046740	162.93561262534155	1.87	0.7053925894635349	0.1714063421808881	4.115323741750009	1.1250325863349693e-4	core-2/I-branching enzyme
ZT0	Medtr8g066975	4548.58704861608	113.3	0.7052576771173198	0.08181472171952481	8.62018060191009	8.031959863789821e-17	carnitine/acylcarnitine carrier-like protein
ZT0	Medtr5g027220	1645.745743742291	39.58	0.7049724339343135	0.07362382170235482	9.57533061492467	1.6735182876200874e-20	plant/K24G6-12 protein
ZT0	Medtr5g093570	111.87010920268692	1.49	0.7049207078482573	0.19625090542608914	3.59193607957004	8.185830833277835e-4	aspartate carbamoyltransferase, catalytic chain
ZT0	Medtr5g022300	66203.40154885236	1455.75	0.704705604009817	0.051376574318551436	13.7164770784524	4.811638537146927e-41	leaf ferredoxin-NADP reductase
ZT0	Medtr8g442660	370.3659813017922	13.08	0.7039609850313143	0.090620389605908	7.768240548211233	7.279586183774202e-14	ATP-binding ABC transporter
ZT0	Medtr4g065030	776.0295050252223	8.16	0.7039027774931162	0.08928463056303937	7.883806799157062	3.0248796628880336e-14	GTPase Der protein
ZT0	Medtr1g069465	5293.180333248349	141.93	0.7034736025573706	0.11731031906280276	5.996689875003766	1.058942640083238e-8	photosystem II reaction center Psb28 protein
ZT0	Medtr3g118120	1384.2685447044992	13.92	0.7033558295680319	0.06510862657953627	10.80280550394988	8.076766225058613e-26	DEAD-box ATP-dependent RNA helicase
ZT0	Medtr3g115270	2318.2386112282825	23.25	0.7033137972646962	0.049014950828327374	14.34896466035477	7.263925110487146e-45	PPR containing plant-like protein
ZT0	Medtr1g026910	1044.131147541405	11.18	0.7025681030306933	0.13970161111760962	5.029062280743686	1.897877093497555e-6	sulfite exporter TauE/SafE family protein
ZT0	Medtr2g436460	29.599267571604035	0.54	0.7025224873170086	0.32300121022790645	2.1749840714878923	0.04941378814007321	mTERF protein
ZT0	Medtr5g066180	119.8868447292882	4.25	0.7024452579488035	0.2156157114012001	3.2578574788631744	0.002534176747681255	MADS-box transcription factor
ZT0	Medtr8g098835	375.63896762068913	4.95	0.7024025289527728	0.09605759512826946	7.312305997405278	2.0731742238310574e-12	transferring glycosyl group transferase
ZT0	Medtr1g115520	21.566678898044003	2.81	0.7021675432636851	0.40052162358361787	1.7531326697947731	0.11879460653932439	hypothetical protein
ZT0	Medtr7g029105	394.1086053135275	21.55	0.7017995521966389	0.11841183014804532	5.9267688990129495	1.586616026756786e-8	plant/MOJ10-14 protein
ZT0	Medtr3g096300	371.0505698860778	13.07	0.7016724038959236	0.09063258456566668	7.74194410606856	8.881723945329453e-14	ATP-binding ABC transporter
ZT0	Medtr0536s0020	1035.0064895870362	15.36	0.7012242940949261	0.07804203752758496	8.985212538140992	3.477398293226218e-18	UDP-glucosyltransferase family protein
ZT0	Medtr8g063210	117.78305706742003	3.18	0.7011293602070974	0.16074139100901771	4.361847037691515	4.043134051448671e-5	C-4 methylsterol oxidase
ZT0	Medtr2g035660	719.135336294834	10.32	0.7010431325628754	0.12554562788146686	5.583970898809483	1.0863214514855478e-7	plastid transcriptionally active 14 protein
ZT0	Medtr4g037255	8.667193542124439	0.75	0.7010293253138671	0.718148389648194	0.9761622185872849	0.40527477309817933	hypothetical protein
ZT0	Medtr3g077490	1049.5264745847196	16.4	0.6996847180811624	0.1409182742725414	4.965180858856852	2.585148265366672e-6	embryo defective 2759 protein
ZT0	Medtr7g105540	34.83375410219702	0.42	0.6995378239104666	0.288449592343616	2.4251648900829132	0.027247091449053858	PPR containing plant-like protein
ZT0	Medtr8g095330	458.1293937085438	11.04	0.6994038812920725	0.10131469449085301	6.903281748090518	3.5201605035183986e-11	sucrose non-fermenting-like kinase 2 family protein
ZT0	Medtr5g068170	72.45436644453038	1.75	0.6990131315936087	0.21590176097525024	3.237644419554964	0.0027042610059761977	PPR containing plant-like protein
ZT0	Medtr1g052100	9.562934466503263	0.1	0.6987492136127771	0.5804834457529039	1.2037366762569415	0.296974221290852	PPR containing plant-like protein
ZT0	Medtr3g070330	438.7240020793269	27.86	0.6983770089534965	0.09964555647281438	7.008611659909089	1.723870140573219e-11	yippee family zinc-binding protein, putative
ZT0	Medtr1g115850	6.368064091659368	0.35	0.6983499827318951	0.5683717647017804	1.2286852129227657	0.28651244998989633	chalcone-flavanone isomerase family protein
ZT0	Medtr6g012280	544.3621788702188	11.54	0.6981935345030484	0.11181297372557851	6.2442980562937	2.4228665812441892e-9	transcription factor HB29-like protein
ZT0	Medtr4g086260	145.50392805780118	5.09	0.6972134838195682	0.152501383629659	4.571850216865649	1.6109658288087402e-5	EF hand calcium-binding family protein
ZT0	Medtr4g021220	69.10474163105951	0.65	0.6969172822272632	0.2728071629489197	2.554615042706022	0.019640198914948864	PPR containing plant-like protein
ZT0	Medtr3g010820	67.12383225296131	0.75	0.6965352160868327	0.25762764692080015	2.7036508868978704	0.013180877720445192	zinc induced facilitator-like protein
ZT0	Medtr7g017440	156.13986470058884	0.66	0.6959900675684666	0.25721094756722346	2.7059115257392605	0.013099424546976558	leguminosin group485 secreted peptide
ZT0	Medtr1g108270	15.823844564078806	0.23	0.695772123999117	0.41971676991304924	1.6577181896812387	0.14184813753732128	PPR containing plant-like protein
ZT0	Medtr6g088605	126.7696581354005	7.64	0.6955180679514184	0.1620315170566519	4.292486305045461	5.4212802728558716e-5	ribosomal protein S6 family protein
ZT0	Medtr1g055315	263.97534194906353	4.02	0.6953213187762725	0.1119506096375435	6.2109650052597045	2.961086119115228e-9	START-2 domain protein
ZT0	Medtr3g070850	438.10962391341116	2.18	0.6950269440739738	0.10891908459322222	6.3811309713965745	1.0394173322575246e-9	double Clp-N motif P-loop nucleoside triphosphate hydrolase superfamily protein
ZT0	Medtr4g105500	362.78344171279247	6.25	0.6948644809661695	0.13596338385085538	5.11067363348649	1.2671811491439465e-6	embryo defective 2759 protein, putative
ZT0	Medtr2g438210	146.67015242460863	2.96	0.6944046325699059	0.14792470855990414	4.694311311005201	9.255572113479892e-6	phospholipid/glycerol acyltransferase family protein
ZT0	Medtr1g099360	242.3392699636167	2.46	0.694303435730286	0.12166834158309645	5.706525022830972	5.5156746213414524e-8	pyruvate kinase family protein
ZT0	Medtr5g036290	10076.644970179697	304.53	0.6940922163382562	0.08492648473059634	8.172859368194203	3.1470195699176655e-15	matrixin family protein
ZT0	Medtr7g114590	3311.6528424238163	153.5	0.6938989170748555	0.06400777147485093	10.840854182019022	5.405565386011506e-26	rubredoxin-like protein
ZT0	Medtr3g088555	250.4149803913741	1.73	0.6938316378216961	0.1516417597295184	4.575465485623982	1.585429333169253e-5	preprotein translocase subunit SecA
ZT0	Medtr1g085040	29.119984767967615	0.44	0.6938254561490564	0.42508111959825806	1.6322189440095276	0.14855638018192482	myb transcription factor
ZT0	Medtr4g064983	477.8123464787332	19.3	0.693590090718898	0.07751677814633268	8.947612469258848	4.8368324060889826e-18	core histone H2A/H2B/H3/H4
ZT0	Medtr0015s0130	101.60766178071421	1.45	0.6931683832660797	0.23421688820714975	2.9595149545878043	0.006341515912908425	actin-97
ZT0	Medtr5g092960	54.58507916847702	0.57	0.6930331835474074	0.2821133536623322	2.4565770267539846	0.025178339459810767	F-box/RNI/FBD-like domain protein
ZT0	Medtr5g043480	1444.7890936947551	38.6	0.6926553876836177	0.06046155587581552	11.456129066646765	6.528777785683439e-29	UvrB/uvrC domain protein
ZT0	Medtr5g092010	55.56114452393293	0.98	0.6925321821314712	0.3047142271363121	2.272726773015659	0.039437744513228866	snRNP Sm family protein
ZT0	Medtr8g063270	188.4049872005104	1.28	0.6911488425694872	0.20885408812846845	3.3092425853994003	0.002142502655896384	cellulose synthase-like protein
ZT0	Medtr4g104800	6.261595713153197	0.02	0.6903926736730351	1.0063780172425663	0.6860172438629792	0.5675987002942124	PPR containing plant protein
ZT0	Medtr4g093600	363.6897101910669	14.5	0.6902217636478648	0.2069540443044925	3.3351450848302253	0.001966435364080585	isochorismatase hydrolase family protein
ZT0	Medtr1g086390	10.111285981814397	0.03	0.6899172323887175	0.9934512588955905	0.6944651045645575	0.5625238002993944	polygalacturonase/glycoside hydrolase family protein
ZT0	Medtr4g081120	112.74002497860967	4.35	0.6898793531449545	0.1762333014702465	3.9145799765966878	2.491669140288312e-4	ribosomal protein S13P/S18e
ZT0	Medtr5g045630	44.51755352287191	2.48	0.6898534455092898	0.2815733461862534	2.4499955512584983	0.02559662088511635	cytochrome b5-like heme/steroid-binding domain protein
ZT0	Medtr2g087950	845.3412079450524	2.65	0.6888323905171335	0.17732678178201877	3.884536693187663	2.7936333479186706e-4	cellulose synthase-like protein
ZT0	Medtr3g005730	457.0355907325745	11.01	0.6886718650578945	0.08759538166805081	7.861965459179886	3.5734831126793226e-14	methyltransferase domain protein
ZT0	Medtr6g042090	56.39364789195512	1.17	0.6881545230138938	0.23845458456959964	2.885893446989008	0.007880061089851117	hypothetical protein
ZT0	Medtr6g463260	551.2431782899519	5.86	0.6871503779524831	0.09857787540239944	6.970634892946348	2.227872568497857e-11	1-aminocyclopropane-1-carboxylate synthase
ZT0	Medtr1g031620	267.1115907704854	13.11	0.6869500549547656	0.10576520308554956	6.495047850464743	5.084739323254025e-10	hypothetical protein
ZT0	Medtr1g039790	178.06055528115618	19.69	0.6857483970742035	0.16655518149293327	4.11724445272391	1.1167251606933917e-4	hypothetical protein
ZT0	Medtr2g101640	409.3350135029332	2.36	0.6851124529886321	0.11548632393402078	5.9324119917441305	1.536334321163371e-8	peptide/nitrate transporter plant
ZT0	Medtr1g047250	808.7481969858687	17.75	0.6845861344566305	0.08012415480588615	8.544066843702154	1.5191877116111945e-16	voltage-gated potassium channel subunit beta
ZT0	Medtr1g080310	85.61452939526065	0.78	0.6845630316686218	0.2921088868449055	2.34352004508541	0.03330757341483199	ankyrin repeat 13B-like protein
ZT0	Medtr7g074610	493.99362009804554	8.74	0.6845164669840673	0.0926277543807008	7.389971521610027	1.1880325413673333e-12	Serine/Threonine kinase family protein
ZT0	Medtr8g095160	224.14190400826544	0.5	0.6843555980028818	0.20404820813584243	3.353891731052502	0.0018474827839994748	transmembrane protein, putative
ZT0	Medtr1g113720	188.28101746258847	2.56	0.6839519270424321	0.14074895958103473	4.859374655971464	4.2977881481208356e-6	pentatricopeptide (PPR) repeat protein
ZT0	Medtr7g105430	174.5778272805571	2.77	0.6837675318478662	0.1171374930040884	5.837307204653944	2.6412738135221014e-8	plant/F24K9-26 protein
ZT0	Medtr4g019080	913.0293339882883	30.4	0.683721682561058	0.0715772615220098	9.552219071007846	2.0780369296419983e-20	legume lectin beta domain protein
ZT0	Medtr8g090295	66.06815935883412	1.77	0.6831558547727629	0.2211161390581902	3.0895793390865043	0.004295597772941393	electron transport SCO1/SenC family protein, putative
ZT0	Medtr4g031180	9.336015621233653	0.09	0.6829996461070104	0.7032338379096936	0.9712269366007361	0.40781923699098577	queuine tRNA-ribosyltransferase
ZT0	Medtr8g446930	282.9529187382522	4.75	0.6829669808996923	0.1283288448311483	5.322006769392511	4.357295684949258e-7	zinc finger CCCH domain protein
ZT0	Medtr5g080770	3555.108443783239	90.2	0.682109387645317	0.08186702462523851	8.331918629848822	8.693654399847861e-16	mannose-1-phosphate guanylyltransferase-like protein
ZT0	Medtr1g031880	47.676358573224526	5.23	0.6818108586477462	0.24798320433649138	2.749423536452851	0.011609025432510441	dynein light chain type 1 family protein
ZT0	Medtr8g012755	16.00586914398692	2.34	0.6817817637376113	0.3880405395665113	1.7569859182735001	0.11795885547189643	hypothetical protein
ZT0	Medtr8g086060	104.67265298719016	2.09	0.6817566259308876	0.18289377146947827	3.727609860375484	5.025911968589042e-4	thioredoxin family protein, putative
ZT0	Medtr7g108300	2182.050502258386	39.33	0.6814180841689018	0.05483677014422743	12.426298674715683	7.640385943122899e-34	peptide chain release factor 1
ZT0	Medtr7g012875	40.282207225914554	7.5	0.681062658966203	0.270963115973682	2.5134884374165263	0.021803817079573802	hypothetical protein
ZT0	Medtr7g108790	48.25453899505867	2.52	0.6809376307078772	0.2542245751975991	2.6784886165258026	0.014135473764010474	plant invertase/pectin methylesterase inhibitor
ZT0	Medtr8g106010	367.45346000351526	5.75	0.680660896490045	0.16352488841898394	4.1624299705745935	9.281525916154639e-5	import receptor subunit TOM40-like protein
ZT0	Medtr4g048000	790.0069462051845	8.23	0.6806489119250764	0.19925670774071277	3.415939767562485	0.001503003952686915	MATE efflux family protein
ZT0	Medtr4g116420	410.5876452553906	3.08	0.6802551719313857	0.19122367897352832	3.5573793767745445	9.246269096989372e-4	phosphatase 2C family protein
ZT0	Medtr7g092100	11.7694575632658	0.11	0.6789860586969709	0.5520509575026291	1.2299336672987065	0.2859827034727027	RNAediting factor 1
ZT0	Medtr4g068880	646.3435213706076	9.71	0.6782585519269849	0.08333979585895195	8.13847148215842	4.135991535146573e-15	plastid division protein PDV2, putative
ZT0	Medtr4g010150	612.6875714399017	6.34	0.677673188223916	0.13161873227619555	5.148759424318504	1.0479787196233262e-6	fatty-acid desaturase
ZT0	Medtr8g089995	518.3793240560684	12.72	0.6772331900307207	0.08939437978145026	7.575791584285365	3.0739215664408285e-13	transmembrane protein, putative
ZT0	Medtr8g097290	2207.356666730395	16.37	0.6766144711617321	0.05955703285040253	11.360782073567641	1.9057715306542683e-28	heat shock transcription factor 8, putative
ZT0	Medtr4g124360	872.0785648935242	43.12	0.6763784636724318	0.1202690997647983	5.6238756671096475	8.73849898053562e-8	divergent CCT motif protein
ZT0	Medtr5g028010	68.38135615023042	2.73	0.6762540504245901	0.2314917298393315	2.921288163918206	0.007107176542953587	MIP18 family plant protein
ZT0	Medtr2g069680	750.4071588690108	5.57	0.6761304965648955	0.12312450220033928	5.491437402644235	1.7917808297862237e-7	PPR containing plant-like protein
ZT0	Medtr6g082620	293.561112332014	6.34	0.6761100262481861	0.1165257142638222	5.802238849336093	3.222991370034406e-8	zinc finger, C3HC4 type (RING finger) protein
ZT0	Medtr3g111500	8.563170408409619	0.11	0.6761048879212816	0.6203737902510744	1.0898347069879468	0.34866204578997567	PPR containing plant-like protein
ZT0	Medtr4g086835	392.63215202435333	5.5	0.675939482212409	0.144382246602886	4.681596928405863	9.803537837745375e-6	myb-like transcription factor family protein
ZT0	Medtr3g077590	1124.8388139631265	19.35	0.6754014455605047	0.0879766789017755	7.677050941131561	1.4459882451460479e-13	anthranilate phosphoribosyltransferase
ZT0	Medtr2g014370	91.5217782674059	11.37	0.6746657896144745	0.19839981714693813	3.400536347847569	0.0015816470139434426	hypothetical protein
ZT0	Medtr6g027770	50.93806483783668	3.5	0.6745637472254602	0.24974148060972648	2.7010480821149923	0.013271977062314725	HSP20-like chaperone superfamily protein
ZT0	Medtr4g070060	162.83061889174525	1.15	0.6740614963547825	0.18440444394452718	3.65534301634051	6.531463381332969e-4	transcription termination factor family protein
ZT0	Medtr6g048070	88.22547055963632	7.92	0.6738137564453628	0.18759660011968246	3.591822858279332	8.188673476153348e-4	hypothetical protein
ZT0	Medtr3g101740	964.1799188825624	32.18	0.67367547245218	0.09140979897804302	7.369838682327694	1.3745735642296568e-12	thioredoxin
ZT0	Medtr1g034340	283.8357390762048	9.89	0.6730825277638626	0.1255791434946055	5.3598273489799375	3.5874066768977967e-7	cold acclimation protein WCOR413
ZT0	Medtr4g087730	368.2225221398922	8.81	0.6716877185889684	0.12391417211185814	5.420588356775135	2.611801390541619e-7	Pmr5/Cas1p GDSL/SGNH-like acyl-esterase family protein
ZT0	Medtr1g017350	46.43202768953778	1.02	0.6713829813041707	0.22947520580628564	2.9257321240662795	0.0070144615936129345	transcription factor
ZT0	Medtr2g006350	304.5133899002766	4.38	0.6711293018117782	0.10778022578796081	6.226831470293173	2.6922490379738194e-9	thiamine-phosphate pyrophosphorylase
ZT0	Medtr0380s0040	927.6806619259321	31.23	0.671116785481244	0.08057364513096643	8.32923450826128	8.886220144975302e-16	YbaB/EbfC DNA-binding family protein
ZT0	Medtr6g005540	632.9589279216644	12.85	0.6708954717245412	0.08280622096649155	8.101993592921316	5.5104256585644695e-15	hypothetical protein
ZT0	Medtr1g100315	266.54142852064876	9.24	0.6707302484559613	0.20636450133565434	3.250221060864584	0.0025966415049869063	short-chain dehydrogenase TIC 32
ZT0	Medtr1g007320	446.58479008449564	5.21	0.670389622012726	0.11211382893234009	5.9795444361935175	1.170172624442653e-8	haloacid dehalogenase-like hydrolase
ZT0	Medtr8g036160	113.33211094158742	2.55	0.6701340417243516	0.16932262628688566	3.9577347482724154	2.1032652331650148e-4	AT hook motif DNA-binding family protein
ZT0	Medtr8g075400	84.74533837566877	1.61	0.67010451367033	0.249313478043981	2.6877989867524046	0.013777150772748973	rRNA-processing EBP2-like protein
ZT0	Medtr1g031930	1656.0576368215814	36.17	0.6700914736951746	0.07571541368334242	8.850132900252468	1.1302207147437217e-17	jasmonate zim-domain protein
ZT0	Medtr3g097280	242.30170893570593	3.51	0.6693558701627667	0.1230568182410897	5.4394049816189955	2.3628148932022107e-7	ENTH/VHS/GAT family protein
ZT0	Medtr4g035170	779.2569144385716	16.89	0.6692891736463602	0.09200641081972895	7.27437542322697	2.712386343270269e-12	adenylate kinase
ZT0	Medtr7g076350	8.711666366255885	0.08	0.668790771388244	0.5942217538042873	1.1254902182670963	0.33194285608439345	pentatricopeptide (PPR) repeat protein
ZT0	Medtr8g085630	342.98591591613456	3.08	0.6683360067362851	0.1717503729713719	3.891322010972787	2.7233964986535356e-4	neutral amino acid transporter
ZT0	Medtr2g058990	16.476661428312145	0.1	0.6682987534020464	0.4508193034178418	1.482409356332805	0.19230780288778315	pentatricopeptide (PPR) repeat protein
ZT0	Medtr3g070920	122.78743995690509	10.32	0.6681766867770551	0.17358138272513474	3.849356862395258	3.188318505194335e-4	histone H4 domain protein
ZT0	Medtr7g089090	168.10392244783714	2.82	0.6681703104665635	0.21863619069339985	3.056082839476283	0.004752686505731419	myosin heavy chain-like protein
ZT0	Medtr7g083900	795.2546102664829	12	0.6674666891568501	0.15593601335287224	4.280388313162912	5.7025844093902485e-5	basic helix loop helix protein BHLH23
ZT0	Medtr2g019150	61.93658800096075	12.1	0.667191548906518	0.23724256586696071	2.8122758935285717	0.00973681951892676	transmembrane protein, putative
ZT0	Medtr1g073350	30.748160804609856	0.91	0.6671440930898307	0.3939742068112406	1.6933699758915186	0.1329099035449487	CCT motif protein
ZT0	Medtr4g063200	97.32735862752534	7.76	0.6669063024995774	0.15860702058928222	4.204771642653523	7.798580955727346e-5	core histone H2A/H2B/H3/H4
ZT0	Medtr7g084220	54.117070300591394	0.33	0.6661142445891038	0.27274788320610327	2.4422343328903175	0.02609629842173717	LRR receptor-like kinase family protein
ZT0	Medtr3g107510	303.02046265857825	3.51	0.6660315366728108	0.12078659882014965	5.514117817528142	1.5853987559068762e-7	substrate carrier family protein
ZT0	Medtr3g009130	26.28147375400157	1.1	0.6657481982488794	0.39822473141943754	1.6717901871033416	0.1382669231875518	DUF842 domain protein
ZT0	Medtr5g006740	1422.1008608881332	34.6	0.6650211521817118	0.08049923280581316	8.261211057575297	1.5447183724834111e-15	12-oxophytodienoate reductase-like protein
ZT0	Medtr4g050400	1428.3856291802922	77.15	0.6638041511819817	0.13882098891100264	4.781727578727614	6.17947752518515e-6	leguminosin group578 secreted peptide
ZT0	Medtr2g013490	32.699707844747564	0.71	0.6635016215478166	0.29795256593927044	2.2268699699100876	0.043948746856756496	ribosomal RNA large subunit methyltransferase
ZT0	Medtr8g074720	265.8184205748483	9.3	0.6630968124768946	0.110923381118007	5.977971513250684	1.1808754738751204e-8	UPF0548 plant-like protein
ZT0	Medtr7g024560	36.47979334340003	0.75	0.662922420860836	0.29679294134419487	2.233619229144792	0.043260637555696625	hypothetical protein
ZT0	Medtr5g098800	1948.6107926608456	33.96	0.6628298493714305	0.1238779238215079	5.350669666747748	3.761868741604229e-7	coproporphyrinogen III oxidase
ZT0	Medtr6g008690	363.4745030608798	2.99	0.6626594436542795	0.2985707050900107	2.219438921358699	0.044702353181159456	peptide/nitrate transporter plant-like protein
ZT0	Medtr3g102220	782.223458481159	10.43	0.6620195042872132	0.0760888884883833	8.700606848637111	4.062110496217271e-17	papain family cysteine protease
ZT0	Medtr6g090535	119.96378099359049	43.15	0.6615650385429315	0.19896999734980317	3.3249487226953813	0.0020340288571961177	arabinogalactan protein
ZT0	Medtr1g033340	238.6764200525307	5.2	0.6613757113084824	0.16055336918353466	4.1193511831722365	1.1071294735757702e-4	zinc finger-like protein
ZT0	Medtr3g109170	198.39433575755683	16.82	0.6613426331629979	0.13175739826499916	5.0193965718180165	1.9883879260808903e-6	hypothetical protein
ZT0	Medtr5g042870	640.978439452627	7.39	0.6612450716446489	0.07827599149098308	8.447610295946495	3.365606842627864e-16	DHHC-type zinc finger protein
ZT0	Medtr7g092050	94.34525754575725	0.76	0.6612040908168314	0.16907843725211416	3.9106352150091435	2.530524129172486e-4	G-type lectin S-receptor-like Serine/Threonine-kinase
ZT0	Medtr7g095090	311.00717786030714	14.4	0.6611809842688594	0.14474396749896612	4.56793464828565	1.6403894645185027e-5	transmembrane protein, putative
ZT0	Medtr2g078520	277.36732164725817	2.93	0.6611147706473967	0.13925197557755586	4.747615018784357	7.241824104632997e-6	zinc-binding dehydrogenase family oxidoreductase
ZT0	Medtr5g013770	67.91478864099285	2.91	0.6605907436096442	0.22928212923675928	2.881126173281088	0.00798396944437899	ethphon-induced protein
ZT0	Medtr1g115870	552.7274692000257	7.25	0.6598863138768991	0.16913308095546636	3.9015804013565547	2.6182710160746036e-4	chalcone-flavanone isomerase family protein
ZT0	Medtr5g021650	966.0467827247413	5.39	0.6596274918825066	0.09422976234295745	7.000203284836215	1.8241556995351617e-11	ATP-binding microtubule motor family protein
ZT0	Medtr5g067730	256.46928991959345	3.26	0.6595517404900113	0.13919746691015292	4.738245279389522	7.5614768817160484e-6	rhodanese-related sulfurtransferase
ZT0	Medtr3g465120	340.34796114792823	8.63	0.6592466886770626	0.0989535804989176	6.662181250574088	1.744914065758284e-10	phytol kinase
ZT0	Medtr4g081550	1680.5305074129749	44.25	0.6592373769667473	0.08431774024471228	7.818489620967864	4.969721803187592e-14	transmembrane protein, putative
ZT0	Medtr8g081040	699.2750971087107	23.81	0.659137430557951	0.19077512456439968	3.455049142612128	0.0013148247395293215	xyloglucan endotransglucosylase/hydrolase family protein
ZT0	Medtr4g070340	591.4142439357595	7.26	0.658590219506241	0.15346227429852144	4.291544762494024	5.441398604548274e-5	allergenic isoflavone reductase-like protein Bet protein
ZT0	Medtr2g039910	325.1157336391497	4.7	0.6584007456679268	0.14444077774130706	4.558274719671756	1.7116701990074916e-5	calmodulin-binding family protein
ZT0	Medtr8g073250	523.4933719983342	8.36	0.6583733397592405	0.09667628937012121	6.8100807762561635	6.581623696617974e-11	Serine/Threonine kinase family protein
ZT0	Medtr7g076250	104.39272869138729	4.34	0.6581059732254356	0.1599324318975479	4.114900057588168	1.126756481689541e-4	zinc finger, C3HC4 type (RING finger) protein
ZT0	Medtr1g090690	373.0317085188049	1.68	0.6579908099603856	0.22119327965903435	2.9747323742143847	0.006066331265914248	NB-ARC domain disease resistance protein
ZT0	Medtr3g104850	841.8815490571807	18.64	0.6570417736580321	0.07562617583081419	8.688020601860417	4.5129691642451465e-17	carbon-nitrogen family hydrolase
ZT0	Medtr4g127800	439.9688570571077	6.13	0.6568759294359058	0.09334532625844985	7.037052156389498	1.4180070642885087e-11	homogentisate phytyltransferase
ZT0	Medtr3g008630	725.0480276934477	50.61	0.6568051852421475	0.12405771419859561	5.294351822335791	5.028349583235159e-7	photosystem I reaction center subunit N
ZT0	Medtr4g032670	1308.107980524563	29.57	0.6566844581709693	0.05743638862076176	11.433247701329101	8.455812672396249e-29	SNARE associated family protein
ZT0	Medtr5g080780	69.12025546339787	0.7	0.6563467783869067	0.22993433779651837	2.8544965692237945	0.008625853897136415	histone acetyltransferase type B catalytic subunit, putative
ZT0	Medtr7g067120	90.31117654892951	1.59	0.6562652947269428	0.2104308995475925	3.118673617505101	0.0039319421507739635	UDP-glucosyltransferase family protein
ZT0	Medtr4g087140	3.4650709492059897	0.04	0.656023052974575	1.0985483204867161	0.597172687573653	0.6214932936066676	senescence-associated nodulin
ZT0	Medtr5g095660	134.8723899648715	15.85	0.6553409531247151	0.1610350841355181	4.0695538903386845	1.3520042247859782e-4	transmembrane protein, putative
ZT0	Medtr3g091840	75.60223952183782	6.54	0.6551739199904155	0.24203193935154235	2.7069729794578885	0.013063177284743792	yippee family zinc-binding protein, putative
ZT0	Medtr1g094180	357.085131610635	7.74	0.6549801582677801	0.1331047735597096	4.920786390684643	3.199111726835242e-6	hypothetical protein
ZT0	Medtr0003s0620	63.36762433793267	3.31	0.6546203625966273	0.20695716845225282	3.1630716997737385	0.003423257525242048	S-adenosylmethionine-dependent methyltransferase, putative
ZT0	Medtr8g028040	896.7363646336063	19.84	0.6544143555748116	0.09108548950230119	7.184616991691947	5.1102702124122166e-12	serine acetyltransferase
ZT0	Medtr4g116920	21.199321976761162	0.49	0.654392085005655	0.35249924104348945	1.8564354438565152	0.09731668189881125	glycoside hydrolase family 18 protein
ZT0	Medtr1g087920	153.52379459018172	2.68	0.654097550853939	0.2039366853903565	3.207355996798353	0.0029740428825310574	ethylene response factor
ZT0	Medtr1g102010	5935.875466401831	65.59	0.65392235770356	0.08202727209853537	7.972011514878062	1.5320359849008523e-14	phosphogluco-mutase
[truncated: 26,549 more rows]
